# Supplementary material for: Microbiome and Exudates of the Root and Rhizosphere of Brachypodium distachyon, a Model for Wheat
Source: PubMed Central journal article supplement (PMC5058512; doi:10.1371/journal.pone.0164533), 2016-10-11
Supplement: pone.0164533.s001.pdf [file pone.0164533.s001.pdf]

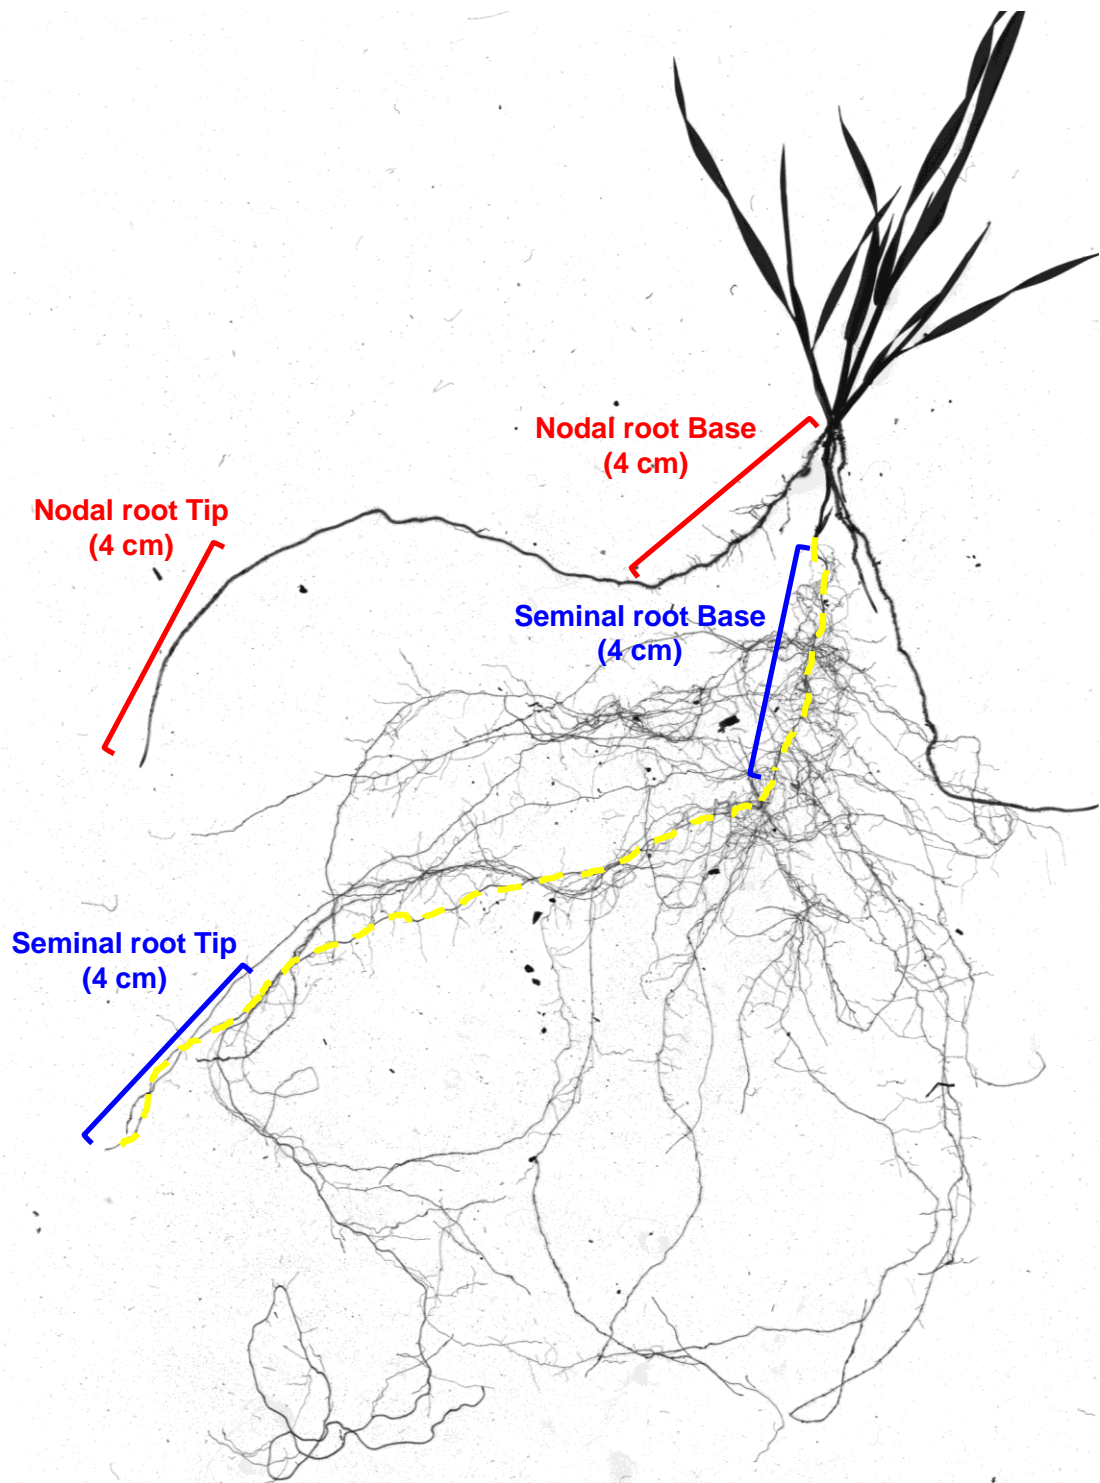

**S1 Fig.** A scanned image of a *B. distachyon* Bd21-3 root system 30 days after sowing. The axile root of the seminal root system is indicated by a yellow broken line. Tips and bases of the nodal root and the seminal root were sampled (4 cm each), and these includes the lateral roots branched from the axile root.
