# Supplementary material for: Microbiome and Exudates of the Root and Rhizosphere of Brachypodium distachyon, a Model for Wheat
Source: PubMed Central journal article supplement (PMC5058512; doi:10.1371/journal.pone.0164533), 2016-10-11
Supplement: pone.0164533.s003.pdf [file pone.0164533.s003.pdf]

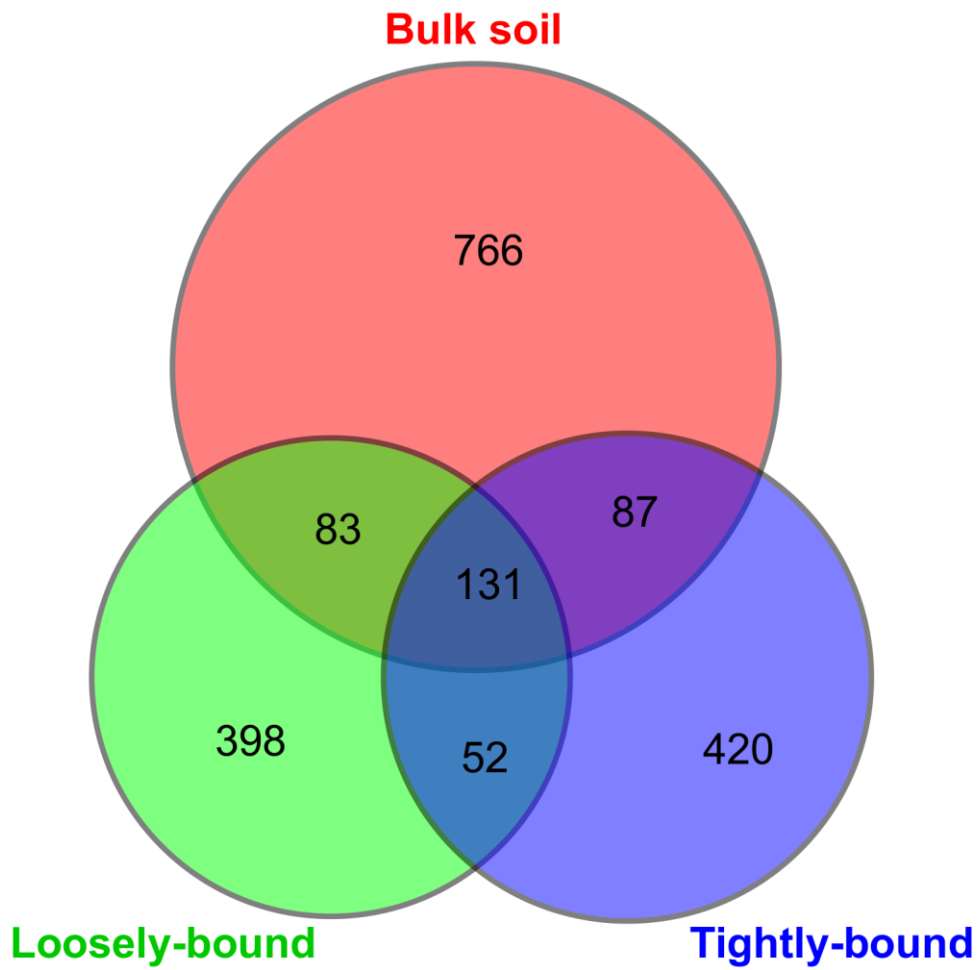

**S3 Fig.** Venn diagram showing the number of shared and unique bacterial OTUs identified in bulk soil and *Brachypodium* rhizospheres. An OTU was considered unique if it was present in at least one replicate of one group, and absent in the other groups (n=4-5).
