# Supplementary material for: Microbiome and Exudates of the Root and Rhizosphere of Brachypodium distachyon, a Model for Wheat
Source: PubMed Central journal article supplement (PMC5058512; doi:10.1371/journal.pone.0164533), 2016-10-11
Supplement: pone.0164533.s007.pdf [file pone.0164533.s007.pdf]

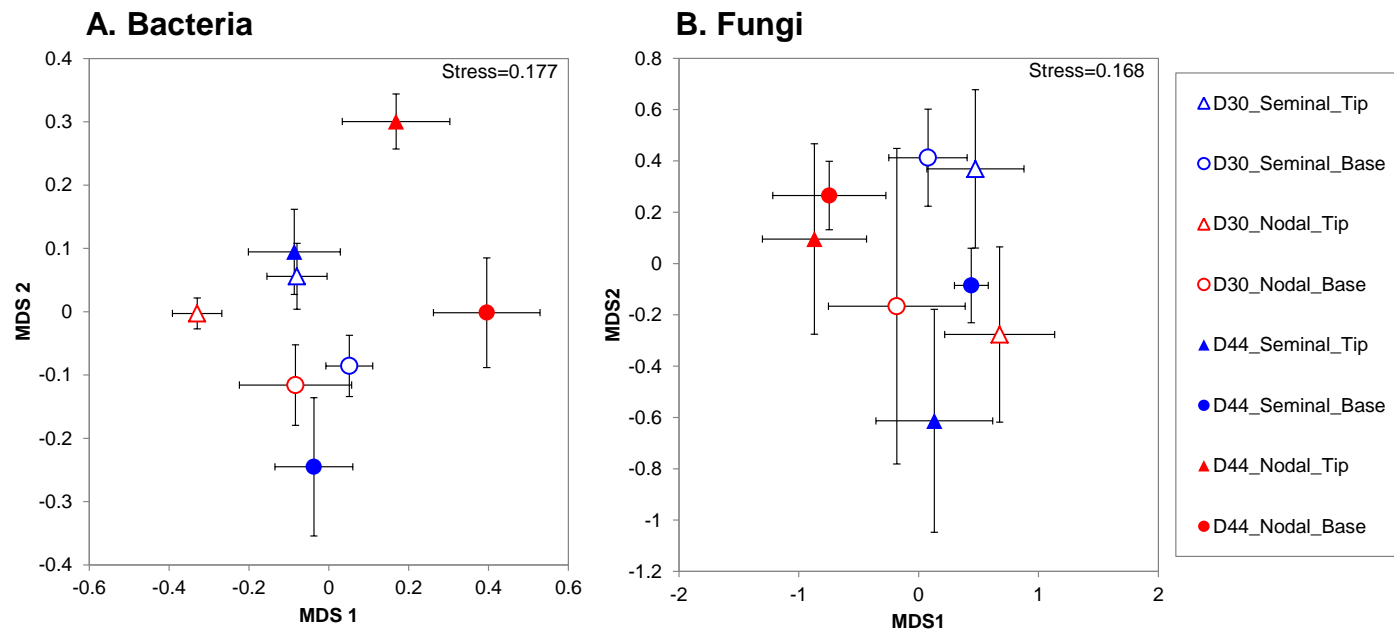

**S7 Fig. Microbial community structures of *Brachypodium* roots.** NMDS ordination plots (Bray-Curtis similarity) of (A) bacterial and (B) fungal community structures colonizing *Brachypodium* seminal and nodal root tips and bases at day 30 and day 44 after sowing. Bacterial 16S rRNA and fungal ITS gene diversities were analyzed with T-RFLP. Data are mean NMDS scores for axes 1 and 2  $\pm$  SE (n=9).
