# Supplementary material for: Microbiome and Exudates of the Root and Rhizosphere of Brachypodium distachyon, a Model for Wheat
Source: PubMed Central journal article supplement (PMC5058512; doi:10.1371/journal.pone.0164533), 2016-10-11
Supplement: pone.0164533.s010.pdf [file pone.0164533.s010.pdf]

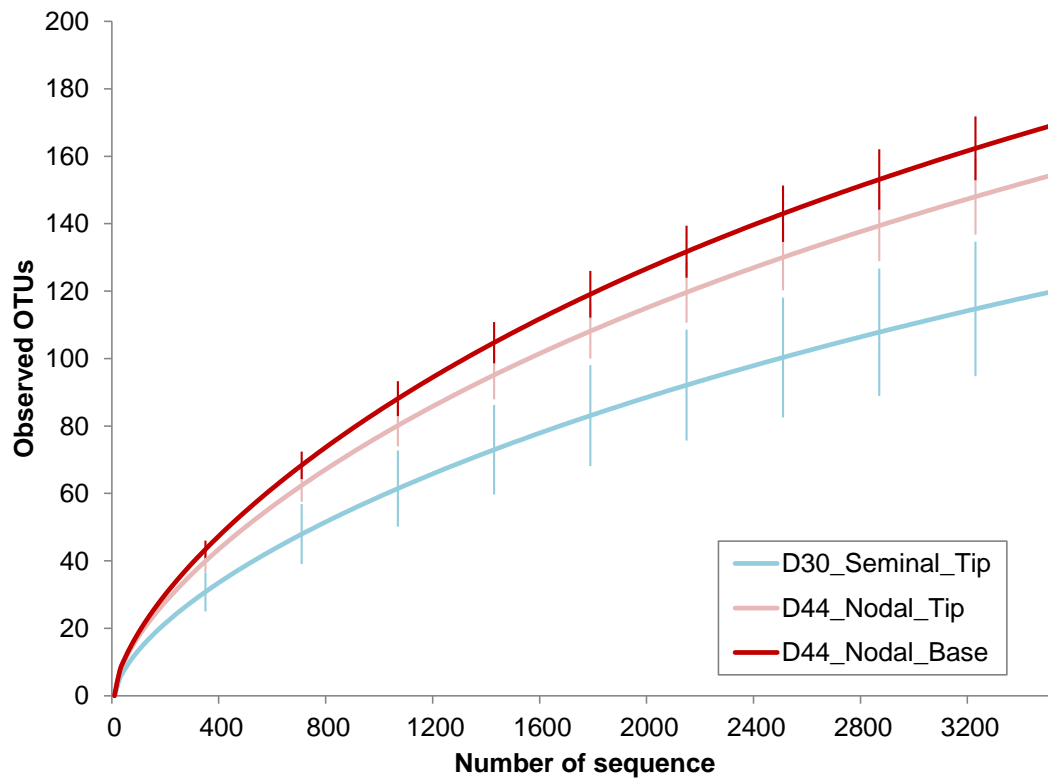

**S10 Fig. Rarefaction curves of bacterial OTUs identified in *Brachypodium* seminal and nodal root systems.** Bacterial community was analyzed with 16S pyrosequencing, and 3534 sequences were randomly subsampled from each sample to achieve even sequencing depth. Means are shown  $\pm$  SE (n=8-9).
