# Supplementary material for: Microbiome and Exudates of the Root and Rhizosphere of Brachypodium distachyon, a Model for Wheat
Source: PLoS One. 2016 Oct 11;11(10):e0164533. doi: 10.1371/journal.pone.0164533 (PMC5058512; doi:10.1371/journal.pone.0164533)
Supplement: S1 Table — Bacterial communities were analyzed with 16S pyrosequencing, and the taxonomy was assigned according to the RDP database. (XLSX) [file pone.0164533.s011.xlsx]

## Sheet: S1 Table
S1 Table. Bacterial OTU counts in the bulk soil and Brachypodium rhizospheres (16S pyrosequencing)
BS: Bulk soil, LB: Loosely_bound rhizosphere, TB: Tightly_bound rhizosphere
1015 sequences were randomly subsampled from each sample to achieve even sequencing depth
	BS_1	BS_2	BS_3	BS_4	BS_5	LB_2	LB_3	LB_4	LB_5	TB_1	TB_2	TB_3	TB_4	TB_5	Phylum	Class	Order	Family	Genus
Otu0001	4	8	7	8	0	248	72	425	125	36	81	35	180	97	Proteobacteria(100)	Betaproteobacteria(100)	Burkholderiales(100)	Oxalobacteraceae(100)	unclassified(58)
Otu0002	3	0	13	8	3	41	101	26	54	82	127	96	74	79	Bacteroidetes(100)	Sphingobacteria(100)	Sphingobacteriales(100)	Chitinophagaceae(100)	unclassified(67)
Otu0003	28	36	20	38	51	79	95	27	99	11	12	9	7	5	Proteobacteria(100)	Alphaproteobacteria(100)	Sphingomonadales(98)	Sphingomonadaceae(98)	unclassified(92)
Otu0004	12	25	17	18	15	56	19	3	57	47	55	72	39	69	Proteobacteria(100)	Gammaproteobacteria(100)	Xanthomonadales(100)	Xanthomonadaceae(100)	unclassified(77)
Otu0005	0	0	2	4	0	0	2	0	18	282	3	1	4	14	Proteobacteria(100)	Betaproteobacteria(100)	Burkholderiales(100)	Alcaligenaceae(100)	unclassified(97)
Otu0006	63	70	92	42	88	1	4	0	9	5	3	17	2	8	Firmicutes(100)	Bacilli(100)	Bacillales(100)	Bacillaceae_1(93)	Bacillus(89)
Otu0007	16	0	9	8	12	28	50	7	17	22	45	73	58	38	Proteobacteria(100)	Gammaproteobacteria(100)	Xanthomonadales(100)	Xanthomonadaceae(100)	Lysobacter(54)
Otu0008	11	7	3	1	6	68	29	52	21	5	39	14	63	32	Proteobacteria(100)	Betaproteobacteria(100)	Burkholderiales(100)	Oxalobacteraceae(100)	Massilia(74)
Otu0009	0	0	0	0	0	10	3	3	6	0	79	37	19	120	Deinococcus-Thermus(100)	Deinococci(100)	Deinococcales(100)	Deinococcaceae(100)	Deinococcus(100)
Otu0010	6	4	0	1	2	10	14	21	1	10	24	70	59	2	Proteobacteria(100)	Betaproteobacteria(100)	Burkholderiales(100)	Comamonadaceae(72)	Pelomonas(71)
Otu0011	29	13	20	35	10	9	16	2	23	8	4	8	3	4	Proteobacteria(100)	Gammaproteobacteria(100)	Xanthomonadales(100)	Xanthomonadaceae(100)	Lysobacter(68)
Otu0012	0	1	0	0	0	1	0	0	0	104	0	3	6	0	Proteobacteria(100)	Gammaproteobacteria(100)	Xanthomonadales(100)	Xanthomonadaceae(100)	Stenotrophomonas(94)
Otu0013	2	0	1	7	1	5	21	9	0	12	15	24	6	33	Bacteroidetes(100)	Sphingobacteria(100)	Sphingobacteriales(100)	Chitinophagaceae(100)	unclassified(98)
Otu0014	0	83	4	2	3	4	2	0	0	0	0	2	0	6	Proteobacteria(100)	Betaproteobacteria(95)	Burkholderiales(95)	Burkholderiales_incertae_sedis(91)	Aquabacterium(82)
Otu0015	21	20	30	21	3	1	2	0	0	8	0	4	0	0	Deinococcus-Thermus(100)	Deinococci(100)	Deinococcales(100)	Deinococcaceae(100)	Deinococcus(69)
Otu0016	22	19	10	5	10	1	0	4	5	0	7	0	2	0	unclassified(100)	unclassified(100)	unclassified(100)	unclassified(100)	unclassified(100)
Otu0017	0	0	0	0	0	4	1	40	0	0	1	0	5	2	Proteobacteria(100)	Betaproteobacteria(100)	Burkholderiales(97)	unclassified(97)	unclassified(97)
Otu0018	2	10	4	0	2	44	0	2	7	1	0	2	16	4	Proteobacteria(100)	Alphaproteobacteria(100)	Sphingomonadales(98)	Sphingomonadaceae(98)	Sphingomonas(90)
Otu0019	0	1	9	2	9	13	28	5	6	0	0	4	0	0	Proteobacteria(100)	Betaproteobacteria(100)	unclassified(100)	unclassified(100)	unclassified(100)
Otu0020	0	0	0	0	1	3	0	1	1	5	5	14	40	7	Proteobacteria(100)	Deltaproteobacteria(100)	Myxococcales(100)	Polyangiaceae(100)	unclassified(68)
Otu0021	1	0	0	0	0	2	12	7	11	3	21	3	0	11	Bacteroidetes(100)	Sphingobacteria(100)	Sphingobacteriales(100)	Chitinophagaceae(100)	Chitinophaga(100)
Otu0022	1	5	5	7	1	0	4	0	0	7	7	0	17	10	Proteobacteria(100)	Alphaproteobacteria(100)	Rhizobiales(100)	Bradyrhizobiaceae(100)	Bradyrhizobium(82)
Otu0023	5	10	4	3	9	1	5	0	6	4	8	9	1	4	unclassified(100)	unclassified(100)	unclassified(100)	unclassified(100)	unclassified(100)
Otu0024	6	4	9	5	25	0	2	3	0	0	0	0	0	2	Proteobacteria(100)	Betaproteobacteria(100)	unclassified(100)	unclassified(100)	unclassified(100)
Otu0025	7	36	8	12	1	3	0	0	0	0	0	0	0	0	unclassified(100)	unclassified(100)	unclassified(100)	unclassified(100)	unclassified(100)
Otu0026	0	1	4	0	0	3	0	5	17	5	6	3	9	10	Proteobacteria(100)	Betaproteobacteria(100)	Burkholderiales(100)	Comamonadaceae(100)	Acidovorax(92)
Otu0027	0	0	0	0	0	0	0	0	8	7	0	1	0	47	Deinococcus-Thermus(100)	Deinococci(100)	Deinococcales(100)	Deinococcaceae(100)	Deinococcus(100)
Otu0028	7	10	7	10	13	0	3	3	1	1	0	6	0	5	Firmicutes(100)	Bacilli(100)	Bacillales(100)	Bacillaceae_1(96)	Bacillus(80)
Otu0029	11	3	4	6	12	1	15	0	1	2	1	0	0	1	Proteobacteria(100)	Alphaproteobacteria(100)	Sphingomonadales(100)	unclassified(95)	unclassified(95)
Otu0030	21	8	1	4	3	0	1	1	0	5	14	2	0	0	unclassified(100)	unclassified(100)	unclassified(100)	unclassified(100)	unclassified(100)
Otu0031	0	0	0	0	2	3	9	6	3	8	0	10	1	5	Proteobacteria(100)	Betaproteobacteria(100)	Burkholderiales(100)	Comamonadaceae(100)	unclassified
Otu0032	0	0	0	0	0	1	1	0	0	0	27	12	18	7	Proteobacteria(100)	Alphaproteobacteria(100)	Rhizobiales(100)	Rhizobiaceae(100)	Rhizobium(100)
Otu0033	9	4	1	21	9	0	3	3	1	0	0	2	2	0	unclassified(100)	unclassified(100)	unclassified(100)	unclassified(100)	unclassified(100)
Otu0034	0	6	0	0	1	0	1	1	0	0	8	9	7	15	Proteobacteria(100)	Alphaproteobacteria(100)	Rhizobiales(100)	Hyphomicrobiaceae(98)	Devosia(95)
Otu0035	12	0	0	1	3	8	0	4	19	0	0	1	2	8	Proteobacteria(100)	Betaproteobacteria(100)	Burkholderiales(100)	Oxalobacteraceae(57)	unclassified(57)
Otu0036	5	7	7	7	6	0	0	0	0	8	0	2	0	5	Proteobacteria(100)	Alphaproteobacteria(100)	Rhizobiales(100)	Bradyrhizobiaceae(100)	Bradyrhizobium(99)
Otu0037	1	1	13	2	9	0	5	1	5	0	0	2	0	0	Proteobacteria(100)	Betaproteobacteria(100)	unclassified(100)	unclassified(100)	unclassified(100)
Otu0038	4	6	15	6	8	0	3	0	1	0	0	0	0	3	Firmicutes(100)	Bacilli(100)	Bacillales(100)	Alicyclobacillaceae(70)	unclassified(70)
Otu0039	0	2	1	11	3	3	2	1	1	0	10	3	2	8	Proteobacteria(100)	Alphaproteobacteria(100)	Caulobacterales(100)	Caulobacteraceae(100)	Phenylobacterium(60)
Otu0040	3	5	5	9	7	0	13	0	3	0	0	0	1	0	Proteobacteria(100)	Alphaproteobacteria(100)	Sphingomonadales(92)	Sphingomonadaceae(92)	unclassified(92)
Otu0041	0	0	1	2	19	3	3	0	6	0	1	2	2	4	Proteobacteria(100)	Betaproteobacteria(100)	Burkholderiales(100)	unclassified(100)	unclassified(100)
Otu0042	7	10	5	3	9	0	0	4	0	1	0	0	0	1	Acidobacteria(100)	Acidobacteria_Gp3(100)	Acidobacteria_Gp3_order_incertae_sedis(100)	Acidobacteria_Gp3_family_incertae_sedis(100)	Gp3(100)
Otu0043	0	0	0	15	0	0	0	0	0	1	9	17	0	1	Actinobacteria(100)	Actinobacteria(100)	Actinomycetales(100)	Streptomycetaceae(100)	Streptomyces(92)
Otu0044	2	7	8	8	8	0	1	0	0	1	0	0	1	0	Firmicutes(100)	Bacilli(100)	Bacillales(100)	Planococcaceae(100)	Sporosarcina(78)
Otu0045	6	3	10	4	4	0	0	0	2	0	0	3	0	0	Acidobacteria(100)	Acidobacteria_Gp10(100)	Acidobacteria_Gp10_order_incertae_sedis(100)	Acidobacteria_Gp10_family_incertae_sedis(100)	Gp10(100)
Otu0046	2	0	15	0	4	1	0	0	0	0	0	8	0	0	unclassified(100)	unclassified(100)	unclassified(100)	unclassified(100)	unclassified(100)
Otu0047	0	0	0	0	1	0	2	4	2	0	5	9	10	0	Proteobacteria(100)	Alphaproteobacteria(100)	Caulobacterales(100)	Caulobacteraceae(100)	Brevundimonas(100)
Otu0048	2	0	4	0	4	0	7	0	10	0	0	3	0	0	Proteobacteria(100)	Betaproteobacteria(100)	unclassified(99)	unclassified(99)	unclassified(99)
Otu0049	1	0	0	0	0	5	0	5	16	0	0	5	3	2	Proteobacteria(100)	Betaproteobacteria(100)	Burkholderiales(100)	Oxalobacteraceae(95)	unclassified(95)
Otu0050	1	0	0	4	2	3	7	2	0	6	3	1	2	3	Bacteroidetes(100)	Sphingobacteria(100)	Sphingobacteriales(100)	Chitinophagaceae(100)	unclassified(92)
Otu0051	4	3	6	4	6	0	2	0	0	4	0	1	2	0	Proteobacteria(100)	Betaproteobacteria(100)	Burkholderiales(100)	Oxalobacteraceae(100)	unclassified(86)
Otu0052	0	1	2	1	2	0	2	0	2	1	1	7	1	5	Proteobacteria(100)	Alphaproteobacteria(100)	Sphingomonadales(100)	Sphingomonadaceae(100)	unclassified(59)
Otu0053	4	6	0	0	7	3	5	1	0	0	0	0	0	0	unclassified(100)	unclassified(100)	unclassified(100)	unclassified(100)	unclassified(100)
Otu0054	12	2	3	2	6	0	1	1	0	1	2	1	4	1	unclassified(100)	unclassified(100)	unclassified(100)	unclassified(100)	unclassified(100)
Otu0055	0	0	0	0	0	21	0	0	2	4	3	0	1	3	Bacteroidetes(100)	Sphingobacteria(100)	Sphingobacteriales(100)	Chitinophagaceae(100)	unclassified(96)
Otu0056	0	0	4	2	1	5	2	2	6	0	0	4	0	4	Proteobacteria(100)	Betaproteobacteria(100)	Burkholderiales(100)	Comamonadaceae(89)	Ramlibacter(86)
Otu0057	5	0	0	0	3	2	4	0	5	0	0	7	2	3	Proteobacteria(100)	Alphaproteobacteria(100)	Caulobacterales(100)	Caulobacteraceae(100)	Brevundimonas(100)
Otu0058	11	0	0	0	0	0	0	0	0	0	1	7	7	4	Proteobacteria(100)	Betaproteobacteria(100)	Burkholderiales(100)	Burkholderiaceae(100)	Burkholderia(100)
Otu0059	11	5	9	0	0	3	0	1	0	0	0	0	0	0	unclassified(100)	unclassified(100)	unclassified(100)	unclassified(100)	unclassified(100)
Otu0060	0	9	0	1	0	0	2	1	0	1	0	7	4	0	Proteobacteria(100)	Gammaproteobacteria(100)	Pseudomonadales(100)	Pseudomonadaceae(100)	Rhizobacter(100)
Otu0061	0	0	0	9	0	0	0	0	0	0	10	4	6	0	Proteobacteria(100)	Alphaproteobacteria(100)	Rhizobiales(100)	Phyllobacteriaceae(100)	Mesorhizobium(98)
Otu0062	8	1	0	5	8	0	0	0	0	0	0	0	0	0	Proteobacteria(100)	Alphaproteobacteria(100)	unclassified(100)	unclassified(100)	unclassified(100)
Otu0063	0	0	0	9	0	0	0	0	0	2	10	2	1	1	Proteobacteria(100)	Gammaproteobacteria(100)	Xanthomonadales(100)	Sinobacteraceae(100)	Steroidobacter(100)
Otu0064	2	2	2	1	10	0	1	0	0	3	0	1	1	0	unclassified(100)	unclassified(100)	unclassified(100)	unclassified(100)	unclassified(100)
Otu0065	5	3	0	0	1	1	4	6	0	0	0	0	0	1	Acidobacteria(100)	Acidobacteria_Gp3(100)	unclassified(58)	unclassified(58)	unclassified(58)
Otu0066	0	5	2	7	0	4	0	0	1	0	0	1	0	0	Proteobacteria(100)	Alphaproteobacteria(100)	Rhizobiales(100)	unclassified(100)	unclassified(100)
Otu0067	0	0	0	0	5	0	0	1	0	3	2	6	0	0	Bacteroidetes(100)	Sphingobacteria(100)	Sphingobacteriales(100)	Chitinophagaceae(100)	unclassified(100)
Otu0068	0	0	0	0	15	0	0	0	0	0	0	0	0	0	Proteobacteria(100)	unclassified(100)	unclassified(100)	unclassified(100)	unclassified(100)
Otu0069	0	0	0	32	0	0	0	0	0	0	0	0	0	0	Actinobacteria(100)	Actinobacteria(100)	unclassified(100)	unclassified(100)	unclassified(100)
Otu0070	8	6	5	0	1	0	0	0	0	0	2	0	1	0	unclassified(100)	unclassified(100)	unclassified(100)	unclassified(100)	unclassified(100)
Otu0071	10	4	2	4	4	0	0	0	0	2	0	0	0	0	unclassified(100)	unclassified(100)	unclassified(100)	unclassified(100)	unclassified(100)
Otu0072	1	4	5	4	3	2	0	1	0	0	0	0	0	0	Firmicutes(100)	Bacilli(100)	Bacillales(100)	Planococcaceae(97)	Sporosarcina(94)
Otu0073	7	13	0	0	0	0	3	0	0	0	0	0	0	0	Proteobacteria(100)	Betaproteobacteria(100)	unclassified(100)	unclassified(100)	unclassified(100)
Otu0074	0	0	0	4	2	6	2	0	0	1	3	0	4	3	Proteobacteria(100)	Gammaproteobacteria(100)	Xanthomonadales(100)	Xanthomonadaceae(100)	Aquimonas(57)
Otu0075	0	0	0	0	7	0	0	0	9	0	0	0	0	0	Proteobacteria(100)	Alphaproteobacteria(100)	Rhizobiales(100)	unclassified(100)	unclassified(100)
Otu0076	3	2	4	3	6	2	0	1	0	0	1	0	0	0	Proteobacteria(100)	Betaproteobacteria(100)	unclassified(100)	unclassified(100)	unclassified(100)
Otu0077	0	0	0	0	0	0	0	0	0	0	0	14	0	0	Deinococcus-Thermus(100)	Deinococci(100)	Deinococcales(100)	Deinococcaceae(100)	Deinococcus(100)
Otu0078	7	4	2	2	3	0	2	2	0	0	0	0	0	0	Proteobacteria(100)	Betaproteobacteria(100)	unclassified(54)	unclassified(54)	unclassified(54)
Otu0079	0	0	0	1	0	7	7	2	0	0	0	2	0	0	Proteobacteria(100)	Betaproteobacteria(100)	Burkholderiales(100)	Oxalobacteraceae(100)	unclassified(97)
Otu0080	0	0	2	10	3	0	0	0	0	0	0	3	1	0	Proteobacteria(100)	Betaproteobacteria(100)	Burkholderiales(100)	Oxalobacteraceae(100)	unclassified(100)
Otu0081	9	0	0	1	1	0	1	0	3	2	0	2	0	0	unclassified(100)	unclassified(100)	unclassified(100)	unclassified(100)	unclassified(100)
Otu0082	5	0	6	15	0	0	0	0	0	0	0	0	0	0	unclassified(100)	unclassified(100)	unclassified(100)	unclassified(100)	unclassified(100)
Otu0083	5	2	5	4	0	0	0	0	0	0	0	4	3	4	unclassified(100)	unclassified(100)	unclassified(100)	unclassified(100)	unclassified(100)
Otu0084	5	5	7	0	2	0	0	0	0	0	0	0	0	0	Proteobacteria(100)	Alphaproteobacteria(100)	Sphingomonadales(100)	Sphingomonadaceae(100)	unclassified(100)
Otu0085	0	1	0	4	0	2	4	1	8	0	0	0	1	5	Proteobacteria(100)	Alphaproteobacteria(100)	Sphingomonadales(100)	Sphingomonadaceae(100)	Sphingomonas(100)
Otu0086	0	1	0	0	0	0	0	0	0	4	0	4	1	7	Proteobacteria(100)	Alphaproteobacteria(100)	Rhizobiales(100)	Bradyrhizobiaceae(100)	Bosea(100)
Otu0087	0	0	0	0	0	0	4	1	0	0	0	1	9	2	Proteobacteria(100)	Alphaproteobacteria(100)	Rhizobiales(100)	Hyphomicrobiaceae(100)	Devosia(100)
Otu0088	2	1	2	1	1	0	1	6	0	0	0	0	2	5	Proteobacteria(100)	Gammaproteobacteria(100)	Xanthomonadales(100)	Xanthomonadaceae(100)	unclassified(100)
Otu0089	3	3	2	2	2	0	1	0	6	0	0	0	1	0	Proteobacteria(100)	Deltaproteobacteria(100)	Myxococcales(100)	Cystobacteraceae(77)	unclassified
Otu0090	0	0	0	0	0	2	0	4	0	7	1	0	5	0	Proteobacteria(100)	Betaproteobacteria(100)	Burkholderiales(100)	Oxalobacteraceae(100)	unclassified(100)
Otu0091	3	1	2	3	5	0	0	0	2	0	0	3	0	0	Proteobacteria(100)	Alphaproteobacteria(100)	Alphaproteobacteria_order_incertae_sedis(97)	Alphaproteobacteria_family_incertae_sedis(97)	Rhizomicrobium(97)
Otu0092	4	2	4	1	1	1	0	0	1	0	0	0	0	0	Proteobacteria(100)	Betaproteobacteria(100)	unclassified(100)	unclassified(100)	unclassified(100)
Otu0093	1	0	0	2	1	1	0	0	1	1	3	4	1	4	Proteobacteria(100)	Alphaproteobacteria(97)	unclassified(94)	unclassified(94)	unclassified(94)
Otu0094	10	2	1	0	2	0	3	0	0	0	0	1	0	0	Firmicutes(100)	Bacilli(100)	Bacillales(100)	unclassified(68)	unclassified(68)
Otu0095	6	0	1	3	4	1	2	0	0	0	3	0	1	0	unclassified(100)	unclassified(100)	unclassified(100)	unclassified(100)	unclassified(100)
Otu0096	0	13	1	1	0	0	0	0	0	0	0	0	0	1	unclassified(100)	unclassified(100)	unclassified(100)	unclassified(100)	unclassified(100)
Otu0097	4	3	0	9	3	1	1	0	1	0	0	0	0	0	Proteobacteria(100)	Betaproteobacteria(100)	Rhodocyclales(72)	Rhodocyclaceae(72)	unclassified(72)
Otu0098	0	1	1	2	0	5	1	1	0	3	1	2	0	1	Proteobacteria(100)	Betaproteobacteria(100)	Burkholderiales(100)	Oxalobacteraceae(54)	unclassified
Otu0099	0	0	0	3	0	0	0	1	0	0	5	2	5	6	Proteobacteria(100)	Betaproteobacteria(100)	Burkholderiales(100)	Oxalobacteraceae(100)	unclassified(100)
Otu0100	1	0	3	0	0	0	4	1	3	1	0	0	0	4	unclassified(100)	unclassified(100)	unclassified(100)	unclassified(100)	unclassified(100)
Otu0101	1	2	0	0	2	0	0	3	0	0	1	1	1	7	Proteobacteria(100)	Betaproteobacteria(100)	Burkholderiales(100)	Burkholderiaceae(79)	Burkholderia(79)
Otu0102	1	1	14	0	1	0	0	0	0	0	0	0	2	0	unclassified(100)	unclassified(100)	unclassified(100)	unclassified(100)	unclassified(100)
Otu0103	1	4	4	2	3	0	0	0	3	0	2	0	0	0	Proteobacteria(100)	Betaproteobacteria(100)	unclassified(100)	unclassified(100)	unclassified(100)
Otu0104	0	0	0	0	1	0	14	0	0	0	0	0	0	0	Proteobacteria(100)	Alphaproteobacteria(100)	Rhizobiales(100)	unclassified(100)	unclassified(100)
Otu0105	0	0	0	0	0	0	0	0	0	14	0	0	0	0	Proteobacteria(100)	Betaproteobacteria(100)	Rhodocyclales(100)	Rhodocyclaceae(100)	Shinella(100)
Otu0106	0	0	0	0	0	0	0	0	26	0	0	0	0	0	Proteobacteria(100)	Gammaproteobacteria(100)	Xanthomonadales(100)	Xanthomonadaceae(100)	Arenimonas(100)
Otu0107	0	2	0	3	5	0	0	0	0	0	1	1	3	0	Proteobacteria(100)	Alphaproteobacteria(100)	Rhizobiales(100)	Methylobacteriaceae(100)	Methylobacterium(100)
Otu0108	0	0	0	0	14	0	0	0	0	0	0	0	0	0	unclassified(100)	unclassified(100)	unclassified(100)	unclassified(100)	unclassified(100)
Otu0109	0	0	1	3	4	0	5	3	3	1	0	1	0	0	Gemmatimonadetes(92)	Gemmatimonadetes(92)	Gemmatimonadales(92)	Gemmatimonadaceae(92)	Gemmatimonas(92)
Otu0110	0	0	0	0	0	0	0	0	2	1	0	6	0	4	Bacteroidetes(100)	Sphingobacteria(100)	Sphingobacteriales(100)	Chitinophagaceae(100)	Chitinophaga(100)
Otu0111	0	1	0	5	0	0	2	1	0	0	2	4	0	0	Proteobacteria(100)	Alphaproteobacteria(100)	Rhizobiales(100)	Xanthobacteraceae(100)	Pseudolabrys(96)
Otu0112	0	0	0	0	0	0	0	0	0	10	0	0	0	2	Proteobacteria(100)	Gammaproteobacteria(100)	Enterobacteriales(100)	Enterobacteriaceae(100)	unclassified(100)
Otu0113	3	1	8	8	2	0	0	0	0	0	0	0	0	0	Actinobacteria(100)	Actinobacteria(100)	Actinomycetales(100)	unclassified(100)	unclassified(100)
Otu0114	6	0	1	2	1	0	8	0	0	0	0	0	0	0	Bacteroidetes(100)	Sphingobacteria(100)	Sphingobacteriales(100)	Chitinophagaceae(100)	unclassified(92)
Otu0115	0	4	0	3	0	2	0	0	0	3	0	2	0	0	Proteobacteria(100)	Betaproteobacteria(100)	Burkholderiales(100)	Oxalobacteraceae(100)	Massilia(100)
Otu0116	0	9	1	1	3	0	0	3	1	0	0	0	0	0	Proteobacteria(100)	Alphaproteobacteria(100)	unclassified(100)	unclassified(100)	unclassified(100)
Otu0117	3	0	0	0	0	0	5	0	0	0	0	2	1	1	Proteobacteria(100)	Deltaproteobacteria(100)	Myxococcales(100)	unclassified(100)	unclassified(100)
Otu0118	3	0	1	0	0	0	0	0	5	0	0	4	5	0	Actinobacteria(100)	Actinobacteria(100)	Actinomycetales(100)	Micromonosporaceae(100)	unclassified
Otu0119	1	2	7	1	3	0	0	0	0	0	0	0	0	4	unclassified(100)	unclassified(100)	unclassified(100)	unclassified(100)	unclassified(100)
Otu0120	0	1	2	0	0	0	0	0	0	1	3	5	2	1	Proteobacteria(100)	Alphaproteobacteria(100)	Caulobacterales(100)	Caulobacteraceae(100)	Phenylobacterium(80)
Otu0121	9	0	1	1	1	0	0	0	0	0	0	2	0	0	Proteobacteria(100)	Alphaproteobacteria(100)	Rhodospirillales(100)	Acetobacteraceae(100)	Belnapia(100)
Otu0122	0	0	0	0	0	0	4	0	0	0	9	7	0	0	Bacteroidetes(100)	Sphingobacteria(100)	Sphingobacteriales(100)	Chitinophagaceae(100)	unclassified(61)
Otu0123	0	0	0	0	1	10	3	1	3	0	1	0	0	0	unclassified(100)	unclassified(100)	unclassified(100)	unclassified(100)	unclassified(100)
Otu0124	0	0	0	0	0	0	0	3	0	3	0	0	2	4	Proteobacteria(100)	Betaproteobacteria(100)	Burkholderiales(100)	Oxalobacteraceae(100)	Oxalicibacterium(74)
Otu0125	1	2	8	0	3	0	0	1	1	0	0	0	0	0	unclassified(100)	unclassified(100)	unclassified(100)	unclassified(100)	unclassified(100)
Otu0126	0	3	1	3	0	0	1	2	0	0	0	0	1	0	Proteobacteria(100)	Betaproteobacteria(100)	unclassified(100)	unclassified(100)	unclassified(100)
Otu0127	0	0	0	0	0	0	0	4	0	0	0	0	7	3	Proteobacteria(100)	Alphaproteobacteria(100)	Rhizobiales(100)	Hyphomicrobiaceae(100)	Devosia(100)
Otu0128	0	0	3	0	2	0	0	0	6	0	0	2	1	0	Proteobacteria(100)	Alphaproteobacteria(100)	Sphingomonadales(100)	Sphingomonadaceae(100)	Sphingomonas(100)
Otu0129	3	2	0	2	8	0	0	0	0	0	0	0	0	0	Acidobacteria(100)	Acidobacteria_Gp1(100)	Acidobacteria_Gp1_order_incertae_sedis(100)	Acidobacteria_Gp1_family_incertae_sedis(100)	Gp1(100)
Otu0130	0	4	3	1	3	0	0	1	0	0	0	0	0	0	Actinobacteria(100)	Actinobacteria(100)	Actinomycetales(100)	Geodermatophilaceae(100)	unclassified(100)
Otu0131	0	2	0	0	2	0	1	2	0	2	6	3	0	0	unclassified(100)	unclassified(100)	unclassified(100)	unclassified(100)	unclassified(100)
Otu0132	0	0	0	6	6	0	0	1	0	1	0	1	0	0	Acidobacteria(100)	Acidobacteria_Gp1(78)	Acidobacteria_Gp1_order_incertae_sedis(78)	Acidobacteria_Gp1_family_incertae_sedis(78)	Gp1(78)
Otu0133	2	0	0	0	6	0	1	1	0	1	0	0	0	0	Proteobacteria(100)	Betaproteobacteria(100)	Burkholderiales(100)	Oxalobacteraceae(100)	unclassified(77)
Otu0134	0	0	0	0	0	1	3	1	0	2	0	0	4	4	Proteobacteria(100)	Betaproteobacteria(100)	unclassified(100)	unclassified(100)	unclassified(100)
Otu0135	0	0	0	0	0	0	2	0	5	0	1	7	0	0	Bacteroidetes(100)	Sphingobacteria(100)	Sphingobacteriales(100)	unclassified(100)	unclassified(100)
Otu0136	0	1	0	3	1	0	0	0	0	0	0	6	0	4	Proteobacteria(100)	Alphaproteobacteria(100)	Rhodospirillales(100)	Rhodospirillaceae(100)	Dongia(81)
Otu0137	0	1	0	5	3	0	0	2	0	1	0	2	0	0	Proteobacteria(100)	Alphaproteobacteria(100)	Sphingomonadales(100)	Sphingomonadaceae(100)	Sphingomonas(100)
Otu0138	1	0	0	0	0	0	0	11	0	0	0	0	1	0	Proteobacteria(100)	Betaproteobacteria(100)	Burkholderiales(100)	Oxalobacteraceae(96)	unclassified(96)
Otu0139	4	2	3	2	1	0	0	1	0	0	0	1	0	0	Actinobacteria(100)	Actinobacteria(100)	Actinomycetales(100)	Geodermatophilaceae(100)	unclassified(65)
Otu0140	5	1	0	3	5	0	0	0	0	0	0	0	0	0	Acidobacteria(100)	Acidobacteria_Gp1(100)	Acidobacteria_Gp1_order_incertae_sedis(100)	Acidobacteria_Gp1_family_incertae_sedis(100)	Gp1(100)
Otu0141	0	0	4	0	3	0	0	0	0	1	3	0	2	0	Bacteroidetes(100)	Sphingobacteria(100)	Sphingobacteriales(100)	Chitinophagaceae(100)	Ferruginibacter(65)
Otu0142	2	0	0	0	0	0	0	1	0	0	5	1	5	0	Proteobacteria(100)	Alphaproteobacteria(100)	Rhizobiales(100)	Hyphomicrobiaceae(100)	Devosia(100)
Otu0143	0	1	5	0	4	0	0	0	0	0	0	0	0	0	unclassified(85)	unclassified(85)	unclassified(85)	unclassified(85)	unclassified(85)
Otu0144	0	0	0	0	0	9	0	1	0	0	0	0	0	0	Firmicutes(100)	Bacilli(100)	Bacillales(100)	Paenibacillaceae_1(100)	Paenibacillus(100)
Otu0145	4	0	4	1	4	0	0	0	0	0	0	0	0	0	Firmicutes(100)	Bacilli(100)	Bacillales(100)	Planococcaceae(100)	unclassified(100)
Otu0146	0	0	0	0	0	0	0	0	0	0	2	3	9	0	Proteobacteria(100)	Alphaproteobacteria(100)	Rhizobiales(100)	Rhizobiaceae(85)	Rhizobium(85)
Otu0147	0	0	0	0	0	4	0	2	3	0	0	0	3	5	Proteobacteria(100)	Betaproteobacteria(100)	Burkholderiales(100)	Comamonadaceae(95)	unclassified
Otu0148	0	1	2	7	4	0	1	0	0	0	0	0	1	0	Proteobacteria(100)	Betaproteobacteria(100)	Burkholderiales(100)	unclassified(64)	unclassified(64)
Otu0149	0	0	0	5	0	0	0	0	0	1	4	4	0	1	Actinobacteria(100)	Actinobacteria(100)	Actinomycetales(100)	Streptosporangiaceae(100)	Nonomuraea(100)
Otu0150	0	0	0	1	7	1	2	2	0	0	1	0	0	0	unclassified(100)	unclassified(100)	unclassified(100)	unclassified(100)	unclassified(100)
Otu0151	0	2	0	2	8	0	1	0	0	0	0	0	0	0	Proteobacteria(100)	Alphaproteobacteria(100)	Rhodospirillales(100)	Rhodospirillaceae(100)	Skermanella(100)
Otu0152	0	1	0	0	0	0	0	0	0	4	0	4	1	5	Proteobacteria(100)	unclassified(100)	unclassified(100)	unclassified(100)	unclassified(100)
Otu0153	7	0	0	3	2	0	2	0	0	0	0	1	0	1	Proteobacteria(100)	Alphaproteobacteria(100)	Rhizobiales(100)	unclassified(100)	unclassified(100)
Otu0154	0	1	0	2	8	0	0	0	0	0	0	0	0	0	Proteobacteria(100)	Alphaproteobacteria(100)	Rhodospirillales(100)	Acetobacteraceae(100)	unclassified(100)
Otu0155	0	1	0	0	0	0	0	0	1	1	4	4	4	0	Proteobacteria(100)	Alphaproteobacteria(100)	Rhizobiales(100)	Hyphomicrobiaceae(100)	Devosia(89)
Otu0156	0	2	2	0	1	1	1	1	0	0	0	0	3	1	Acidobacteria(100)	Acidobacteria_Gp1(100)	Acidobacteria_Gp1_order_incertae_sedis(100)	Acidobacteria_Gp1_family_incertae_sedis(100)	Gp1(100)
Otu0157	0	7	0	0	0	0	0	0	0	0	0	0	0	0	Proteobacteria(100)	unclassified(100)	unclassified(100)	unclassified(100)	unclassified(100)
Otu0158	0	0	2	0	2	5	0	1	1	0	0	0	1	0	Proteobacteria(100)	Betaproteobacteria(100)	unclassified(100)	unclassified(100)	unclassified(100)
Otu0159	0	0	1	0	1	0	8	1	0	0	0	1	0	1	Proteobacteria(100)	Betaproteobacteria(100)	unclassified(100)	unclassified(100)	unclassified(100)
Otu0160	7	0	0	0	3	0	0	0	0	0	0	0	0	0	unclassified(100)	unclassified(100)	unclassified(100)	unclassified(100)	unclassified(100)
Otu0161	0	0	0	0	1	1	3	0	0	0	0	2	2	0	unclassified(100)	unclassified(100)	unclassified(100)	unclassified(100)	unclassified(100)
Otu0162	0	1	0	1	0	1	1	0	3	3	0	1	0	2	Proteobacteria(100)	Alphaproteobacteria(100)	Sphingomonadales(100)	Sphingomonadaceae(100)	unclassified(56)
Otu0163	0	0	0	0	0	0	0	0	16	0	0	0	0	0	unclassified(100)	unclassified(100)	unclassified(100)	unclassified(100)	unclassified(100)
Otu0164	0	0	5	0	0	0	0	0	0	0	7	0	0	4	Proteobacteria(100)	Alphaproteobacteria(100)	Rhizobiales(100)	unclassified(100)	unclassified(100)
Otu0165	0	0	0	1	0	1	2	0	13	0	0	0	0	0	Proteobacteria(100)	Betaproteobacteria(100)	Burkholderiales(100)	unclassified(100)	unclassified(100)
Otu0166	0	0	0	0	0	0	10	0	0	0	0	0	1	0	Bacteroidetes(100)	Sphingobacteria(100)	Sphingobacteriales(100)	Chitinophagaceae(100)	unclassified(100)
Otu0167	7	2	0	1	1	1	1	0	0	0	0	0	0	0	Acidobacteria(100)	Acidobacteria_Gp3(100)	Acidobacteria_Gp3_order_incertae_sedis(100)	Acidobacteria_Gp3_family_incertae_sedis(100)	Gp3(100)
Otu0168	0	0	0	0	0	0	0	11	0	0	0	0	0	0	unclassified(100)	unclassified(100)	unclassified(100)	unclassified(100)	unclassified(100)
Otu0169	4	0	0	8	1	0	0	0	0	0	0	0	0	0	unclassified(100)	unclassified(100)	unclassified(100)	unclassified(100)	unclassified(100)
Otu0170	0	0	0	0	0	0	1	0	0	3	0	2	0	3	Proteobacteria(100)	Gammaproteobacteria(100)	unclassified(100)	unclassified(100)	unclassified(100)
Otu0171	0	2	4	0	6	2	0	1	0	0	0	0	0	0	Proteobacteria(100)	Alphaproteobacteria(100)	Caulobacterales(100)	Caulobacteraceae(100)	Phenylobacterium(71)
Otu0172	0	4	7	0	0	0	0	0	2	0	0	0	0	0	unclassified(100)	unclassified(100)	unclassified(100)	unclassified(100)	unclassified(100)
Otu0173	0	1	0	0	6	0	1	0	0	0	0	0	0	1	Firmicutes(100)	Bacilli(100)	Bacillales(100)	unclassified(95)	unclassified(95)
Otu0174	0	9	0	0	0	0	0	0	0	0	0	0	0	0	Proteobacteria(100)	unclassified(100)	unclassified(100)	unclassified(100)	unclassified(100)
Otu0175	6	3	0	0	0	0	1	0	0	0	2	0	0	0	Proteobacteria(100)	Alphaproteobacteria(100)	unclassified(100)	unclassified(100)	unclassified(100)
Otu0176	2	0	12	0	0	0	0	0	0	0	0	1	0	0	unclassified(100)	unclassified(100)	unclassified(100)	unclassified(100)	unclassified(100)
Otu0177	0	0	4	0	1	1	4	0	0	0	0	2	0	2	Acidobacteria(100)	Acidobacteria_Gp1(100)	Acidobacteria_Gp1_order_incertae_sedis(100)	Acidobacteria_Gp1_family_incertae_sedis(100)	Gp1(100)
Otu0178	0	0	0	4	0	0	4	1	0	0	0	0	1	0	Proteobacteria(100)	Alphaproteobacteria(100)	Rhodospirillales(100)	Rhodospirillaceae(100)	Inquilinus(100)
Otu0179	5	0	0	0	0	1	0	1	0	0	3	0	2	0	Proteobacteria(100)	Alphaproteobacteria(100)	Rhizobiales(100)	Xanthobacteraceae(100)	Pseudolabrys(63)
Otu0180	0	0	0	0	1	1	0	0	0	0	2	5	1	0	Bacteroidetes(100)	Sphingobacteria(100)	Sphingobacteriales(100)	Chitinophagaceae(100)	unclassified(100)
Otu0181	3	4	0	0	4	0	0	1	1	0	0	0	1	0	Proteobacteria(100)	Alphaproteobacteria(100)	Rhizobiales(100)	unclassified(82)	unclassified(82)
Otu0182	0	3	0	1	1	3	1	0	0	0	4	0	0	0	Proteobacteria(100)	Betaproteobacteria(100)	Burkholderiales(100)	Burkholderiaceae(88)	Burkholderia(88)
Otu0183	0	0	0	0	0	0	0	0	0	6	5	0	0	0	Bacteroidetes(100)	Sphingobacteria(100)	Sphingobacteriales(100)	Chitinophagaceae(100)	unclassified(100)
Otu0184	0	0	0	0	0	0	0	3	2	0	0	0	3	0	Proteobacteria(100)	Betaproteobacteria(100)	Burkholderiales(100)	Oxalobacteraceae(100)	unclassified(88)
Otu0185	1	0	3	0	1	0	2	0	0	0	0	0	0	0	Proteobacteria(100)	Betaproteobacteria(100)	unclassified(100)	unclassified(100)	unclassified(100)
Otu0186	0	0	1	0	0	1	2	3	0	0	1	0	1	0	Proteobacteria(100)	Betaproteobacteria(100)	Burkholderiales(100)	Oxalobacteraceae(100)	unclassified(100)
Otu0187	0	0	0	0	0	0	0	0	0	7	0	0	0	0	Proteobacteria(100)	Betaproteobacteria(100)	Burkholderiales(100)	unclassified(100)	unclassified(100)
Otu0188	13	0	2	0	0	0	0	0	0	0	0	0	0	0	unclassified(100)	unclassified(100)	unclassified(100)	unclassified(100)	unclassified(100)
Otu0189	0	4	5	0	0	0	0	0	0	0	0	0	0	0	Deinococcus-Thermus(100)	Deinococci(100)	Deinococcales(100)	Trueperaceae(100)	Truepera(100)
Otu0190	3	1	6	1	0	0	0	0	0	0	1	0	0	0	unclassified(100)	unclassified(100)	unclassified(100)	unclassified(100)	unclassified(100)
Otu0191	0	2	1	0	0	0	8	0	1	0	0	0	0	0	Verrucomicrobia(100)	Subdivision3(100)	Subdivision3_order_incertae_sedis(100)	Subdivision3_family_incertae_sedis(100)	3_genus_incertae_sedis(100)
Otu0192	0	5	0	1	0	0	0	0	0	0	0	2	0	0	Proteobacteria(100)	Alphaproteobacteria(100)	Rhodospirillales(100)	Acetobacteraceae(100)	unclassified(100)
Otu0193	0	0	1	0	5	0	1	0	0	0	0	0	0	0	Bacteroidetes(100)	Sphingobacteria(100)	Sphingobacteriales(100)	Chitinophagaceae(100)	unclassified(87)
Otu0194	0	0	4	2	0	0	0	0	0	0	0	5	0	0	unclassified(100)	unclassified(100)	unclassified(100)	unclassified(100)	unclassified(100)
Otu0195	0	6	0	1	0	0	0	0	0	0	0	0	0	0	Proteobacteria(100)	Gammaproteobacteria(100)	Legionellales(100)	Coxiellaceae(100)	Aquicella(100)
Otu0196	0	0	0	1	0	0	4	0	1	0	1	1	0	2	Proteobacteria(100)	Alphaproteobacteria(100)	Sphingomonadales(100)	Sphingomonadaceae(100)	Sphingomonas(80)
Otu0197	0	8	0	1	0	0	0	0	0	0	0	0	0	0	unclassified(100)	unclassified(100)	unclassified(100)	unclassified(100)	unclassified(100)
Otu0198	0	0	7	0	2	0	0	0	0	0	1	0	2	0	unclassified(100)	unclassified(100)	unclassified(100)	unclassified(100)	unclassified(100)
Otu0199	1	1	4	7	0	0	0	0	0	0	0	0	0	0	Proteobacteria(100)	Betaproteobacteria(100)	unclassified(100)	unclassified(100)	unclassified(100)
Otu0200	0	0	1	2	3	0	0	0	0	0	1	2	0	0	Proteobacteria(100)	Alphaproteobacteria(100)	Rhizobiales(100)	unclassified(72)	unclassified(72)
Otu0201	0	0	0	0	6	0	0	0	2	0	0	0	0	0	Bacteroidetes(100)	Sphingobacteria(100)	Sphingobacteriales(100)	Chitinophagaceae(100)	unclassified(100)
Otu0202	0	2	0	5	0	0	2	0	0	0	0	0	0	0	Firmicutes(100)	Bacilli(100)	Bacillales(100)	Bacillaceae_1(100)	Bacillus(100)
Otu0203	0	0	0	0	0	0	0	0	0	0	14	0	0	0	Proteobacteria(100)	Betaproteobacteria(100)	Burkholderiales(100)	unclassified(100)	unclassified(100)
Otu0204	0	0	0	0	0	0	0	0	0	0	14	0	0	0	Proteobacteria(100)	Alphaproteobacteria(100)	Rhizobiales(100)	unclassified(100)	unclassified(100)
Otu0205	0	0	0	0	0	0	0	0	0	0	0	0	10	0	Bacteroidetes(100)	Sphingobacteria(100)	Sphingobacteriales(100)	Chitinophagaceae(100)	unclassified(100)
Otu0206	0	0	0	0	0	1	1	0	0	0	0	3	0	0	Proteobacteria(100)	Alphaproteobacteria(100)	Rhizobiales(100)	Bradyrhizobiaceae(100)	unclassified(100)
Otu0207	0	4	0	1	0	0	0	0	0	1	1	0	1	0	Proteobacteria(100)	Betaproteobacteria(100)	Burkholderiales(100)	unclassified(58)	unclassified(58)
Otu0208	0	0	0	5	2	1	0	2	1	0	0	0	0	0	Proteobacteria(93)	unclassified(70)	unclassified(70)	unclassified(70)	unclassified(70)
Otu0209	2	3	0	0	0	0	0	0	1	0	0	0	0	0	Acidobacteria(100)	Acidobacteria_Gp10(100)	Acidobacteria_Gp10_order_incertae_sedis(100)	Acidobacteria_Gp10_family_incertae_sedis(100)	Gp10(100)
Otu0210	0	1	0	0	3	0	0	0	0	2	0	0	2	0	Proteobacteria(100)	Betaproteobacteria(100)	Burkholderiales(100)	Burkholderiaceae(100)	Burkholderia(100)
Otu0211	2	0	2	0	1	0	0	0	0	2	0	0	0	0	unclassified(100)	unclassified(100)	unclassified(100)	unclassified(100)	unclassified(100)
Otu0212	0	3	0	0	3	0	0	0	0	0	0	1	0	0	unclassified(100)	unclassified(100)	unclassified(100)	unclassified(100)	unclassified(100)
Otu0213	0	0	0	0	0	0	12	0	0	0	0	0	0	0	Proteobacteria(100)	Alphaproteobacteria(100)	unclassified(100)	unclassified(100)	unclassified(100)
Otu0214	0	0	1	3	1	0	1	0	1	0	0	1	0	2	Proteobacteria(100)	Gammaproteobacteria(100)	Xanthomonadales(100)	Xanthomonadaceae(100)	unclassified(100)
Otu0215	3	1	4	0	0	0	0	0	0	0	0	0	0	0	unclassified(100)	unclassified(100)	unclassified(100)	unclassified(100)	unclassified(100)
Otu0216	4	0	0	3	0	0	1	0	2	0	0	0	0	0	Proteobacteria(100)	Alphaproteobacteria(100)	unclassified(93)	unclassified(93)	unclassified(93)
Otu0217	1	0	2	0	1	1	7	0	0	0	0	0	0	0	Proteobacteria(100)	Betaproteobacteria(100)	unclassified(100)	unclassified(100)	unclassified(100)
Otu0218	0	0	0	0	0	0	0	0	0	0	2	1	0	3	Actinobacteria(100)	Actinobacteria(100)	Actinomycetales(100)	Streptomycetaceae(100)	unclassified(93)
Otu0219	0	0	1	5	3	0	3	0	0	0	0	0	0	0	Proteobacteria(100)	Betaproteobacteria(100)	unclassified(70)	unclassified(70)	unclassified(70)
Otu0220	0	0	1	1	4	0	0	0	0	0	0	0	0	0	Firmicutes(100)	Bacilli(100)	Bacillales(100)	Alicyclobacillaceae(100)	unclassified(100)
Otu0221	0	1	0	0	0	0	0	0	5	1	3	0	0	0	Bacteroidetes(100)	Sphingobacteria(100)	Sphingobacteriales(100)	unclassified(100)	unclassified(100)
Otu0222	0	0	0	5	0	0	0	0	0	0	0	0	0	5	Proteobacteria(100)	Gammaproteobacteria(100)	Xanthomonadales(100)	Xanthomonadaceae(100)	unclassified(100)
Otu0223	0	2	2	0	4	0	0	0	0	0	0	0	0	1	Proteobacteria(92)	unclassified(92)	unclassified(92)	unclassified(92)	unclassified(92)
Otu0224	0	0	0	0	1	1	0	0	1	0	0	1	0	2	Proteobacteria(100)	Betaproteobacteria(100)	Burkholderiales(100)	Comamonadaceae(100)	unclassified(100)
Otu0225	0	0	3	0	0	0	0	5	0	0	0	1	0	0	Proteobacteria(100)	Gammaproteobacteria(100)	Xanthomonadales(100)	Xanthomonadaceae(100)	unclassified(100)
Otu0226	0	2	0	8	0	0	0	0	0	0	0	0	0	0	Proteobacteria(100)	Deltaproteobacteria(100)	Myxococcales(100)	unclassified(100)	unclassified(100)
Otu0227	0	0	0	0	0	0	0	0	9	0	0	0	0	2	Proteobacteria(100)	Gammaproteobacteria(100)	Pseudomonadales(100)	Pseudomonadaceae(100)	Cellvibrio(100)
Otu0228	0	0	0	0	0	0	1	0	0	2	0	0	4	1	Proteobacteria(100)	Alphaproteobacteria(100)	Rhizobiales(100)	Phyllobacteriaceae(100)	unclassified(92)
Otu0229	0	0	0	0	1	0	1	0	1	2	0	0	0	3	Proteobacteria(100)	Alphaproteobacteria(100)	Sphingomonadales(100)	unclassified(100)	unclassified(100)
Otu0230	0	7	0	0	0	0	0	0	0	0	0	0	0	0	Proteobacteria(100)	Betaproteobacteria(100)	Burkholderiales(100)	Oxalobacteraceae(100)	Massilia(100)
Otu0231	0	0	0	0	0	0	0	6	0	0	0	0	0	0	Proteobacteria(100)	unclassified(100)	unclassified(100)	unclassified(100)	unclassified(100)
Otu0232	0	0	0	0	0	0	1	2	0	0	2	1	1	2	Proteobacteria(100)	Betaproteobacteria(100)	Burkholderiales(100)	Burkholderiaceae(100)	Burkholderia(67)
Otu0233	2	2	0	0	1	0	1	4	0	0	0	0	0	0	unclassified(100)	unclassified(100)	unclassified(100)	unclassified(100)	unclassified(100)
Otu0234	0	0	0	0	0	2	0	0	0	3	0	1	1	1	Proteobacteria(100)	Gammaproteobacteria(100)	unclassified(75)	unclassified(75)	unclassified(75)
Otu0235	0	0	0	0	0	12	0	0	0	0	0	0	0	0	Proteobacteria(100)	Betaproteobacteria(100)	unclassified(100)	unclassified(100)	unclassified(100)
Otu0236	0	0	0	0	0	2	1	1	0	0	0	0	0	0	Proteobacteria(100)	Betaproteobacteria(100)	Burkholderiales(100)	Comamonadaceae(100)	unclassified(100)
Otu0237	0	6	0	0	0	0	0	0	0	0	0	0	0	0	Proteobacteria(100)	unclassified(100)	unclassified(100)	unclassified(100)	unclassified(100)
Otu0238	0	1	1	1	1	0	0	0	0	4	0	0	0	0	Proteobacteria(100)	Alphaproteobacteria(100)	Rhizobiales(100)	unclassified(100)	unclassified(100)
Otu0239	0	2	0	0	5	0	0	0	0	0	0	0	0	0	Proteobacteria(100)	Betaproteobacteria(100)	Rhodocyclales(100)	Rhodocyclaceae(100)	unclassified(100)
Otu0240	1	1	4	0	1	0	1	0	0	0	0	0	0	0	Firmicutes(100)	Bacilli(100)	unclassified(100)	unclassified(100)	unclassified(100)
Otu0241	0	0	0	0	0	0	0	0	0	3	0	0	0	2	Actinobacteria(100)	Actinobacteria(100)	Actinomycetales(100)	Streptomycetaceae(100)	Streptomyces(100)
Otu0242	0	2	3	0	1	0	0	0	0	0	0	1	1	0	unclassified(100)	unclassified(100)	unclassified(100)	unclassified(100)	unclassified(100)
Otu0243	0	0	0	0	0	0	6	2	0	0	0	0	0	0	Bacteroidetes(100)	Sphingobacteria(100)	Sphingobacteriales(100)	Chitinophagaceae(100)	unclassified(100)
Otu0244	2	2	1	5	0	0	0	0	0	0	0	0	0	0	Acidobacteria(100)	Acidobacteria_Gp3(100)	Acidobacteria_Gp3_order_incetae_sedis(100)	Acidobacteria_Gp3_family_incetae_sedis(100)	Bryobacter(100)
Otu0245	0	0	0	0	0	0	0	0	0	6	0	0	0	0	Proteobacteria(100)	Betaproteobacteria(100)	Burkholderiales(100)	unclassified(100)	unclassified(100)
Otu0246	3	0	0	0	0	0	0	0	9	0	0	0	0	0	unclassified(100)	unclassified(100)	unclassified(100)	unclassified(100)	unclassified(100)
Otu0247	12	0	0	0	0	0	0	0	0	0	0	0	0	0	unclassified(100)	unclassified(100)	unclassified(100)	unclassified(100)	unclassified(100)
Otu0248	0	0	0	1	0	0	0	1	2	0	2	0	0	0	Proteobacteria(100)	Alphaproteobacteria(100)	Rhizobiales(100)	unclassified(55)	unclassified(55)
Otu0249	1	0	0	0	2	0	0	0	0	1	0	0	0	1	Acidobacteria(100)	Acidobacteria_Gp3(100)	Acidobacteria_Gp3_order_incertae_sedis(100)	Acidobacteria_Gp3_family_incertae_sedis(100)	Gp3(100)
Otu0250	0	0	0	0	0	2	1	0	0	0	6	0	1	0	Proteobacteria(100)	Alphaproteobacteria(100)	Sphingomonadales(100)	Sphingomonadaceae(100)	unclassified(55)
Otu0251	0	0	0	0	0	0	2	0	1	0	0	0	0	4	Proteobacteria(100)	Alphaproteobacteria(100)	Caulobacterales(100)	Caulobacteraceae(100)	unclassified(100)
Otu0252	0	3	0	0	2	0	2	0	0	0	0	0	1	0	unclassified(100)	unclassified(100)	unclassified(100)	unclassified(100)	unclassified(100)
Otu0253	1	3	2	3	0	0	0	0	0	0	0	0	0	0	Proteobacteria(100)	Alphaproteobacteria(100)	Rhizobiales(100)	Methylobacteriaceae(100)	Methylobacterium(100)
Otu0254	0	7	0	0	0	0	0	0	0	0	0	0	0	0	Acidobacteria(100)	Acidobacteria_Gp3(100)	Acidobacteria_Gp3_order_incetae_sedis(100)	Acidobacteria_Gp3_family_incetae_sedis(100)	Bryobacter(100)
Otu0255	0	1	2	3	1	0	1	0	0	0	0	0	0	0	unclassified(100)	unclassified(100)	unclassified(100)	unclassified(100)	unclassified(100)
Otu0256	0	0	0	0	0	0	0	0	6	1	1	0	0	0	Proteobacteria(100)	Alphaproteobacteria(100)	Rhizobiales(100)	unclassified(73)	unclassified(73)
Otu0257	8	0	0	0	0	1	0	0	0	0	0	0	0	1	Proteobacteria(100)	Alphaproteobacteria(100)	Caulobacterales(100)	Caulobacteraceae(100)	unclassified(91)
Otu0258	1	0	0	0	1	0	0	3	0	0	0	0	4	0	Proteobacteria(100)	Alphaproteobacteria(100)	Sphingomonadales(100)	Sphingomonadaceae(100)	Sphingomonas(100)
Otu0260	0	0	0	0	3	0	3	0	1	0	1	0	0	0	Verrucomicrobia(100)	unclassified(55)	unclassified(55)	unclassified(55)	unclassified(55)
Otu0261	0	0	0	0	0	0	0	0	0	0	0	8	0	0	Proteobacteria(100)	Gammaproteobacteria(100)	Xanthomonadales(100)	Xanthomonadaceae(100)	unclassified(100)
Otu0262	0	0	0	0	0	0	0	0	0	4	0	0	0	1	Acidobacteria(100)	Acidobacteria_Gp1(100)	Acidobacteria_Gp1_order_incertae_sedis(100)	Acidobacteria_Gp1_family_incertae_sedis(100)	Gp1(100)
Otu0263	1	1	2	1	1	0	1	0	0	0	0	0	0	0	Proteobacteria(100)	Betaproteobacteria(100)	unclassified(100)	unclassified(100)	unclassified(100)
Otu0264	0	0	0	0	5	0	0	0	0	0	0	0	0	0	unclassified(100)	unclassified(100)	unclassified(100)	unclassified(100)	unclassified(100)
Otu0265	0	0	0	0	1	1	2	0	3	0	0	0	1	0	Proteobacteria(100)	Alphaproteobacteria(100)	Sphingomonadales(100)	Erythrobacteraceae(73)	unclassified(64)
Otu0266	0	0	0	3	2	0	1	0	0	0	0	1	0	0	Proteobacteria(100)	Alphaproteobacteria(100)	Rhodospirillales(100)	Rhodospirillaceae(100)	Skermanella(100)
Otu0267	0	0	0	1	2	0	0	1	0	0	0	0	0	0	Firmicutes(100)	Bacilli(100)	Bacillales(100)	unclassified(100)	unclassified(100)
Otu0268	5	0	0	2	0	0	1	0	0	0	0	0	0	1	Verrucomicrobia(100)	Subdivision3(73)	Subdivision3_order_incertae_sedis(73)	Subdivision3_family_incertae_sedis(73)	3_genus_incertae_sedis(73)
Otu0269	0	4	0	0	2	0	0	0	0	0	0	0	0	0	Bacteroidetes(100)	Sphingobacteria(100)	Sphingobacteriales(100)	Chitinophagaceae(100)	unclassified(100)
Otu0270	0	0	0	0	0	0	0	0	0	6	0	0	2	0	Bacteroidetes(100)	Sphingobacteria(100)	Sphingobacteriales(100)	Chitinophagaceae(100)	Chitinophaga(100)
Otu0271	3	0	0	0	1	0	0	0	0	1	0	0	0	0	Proteobacteria(100)	Deltaproteobacteria(100)	Myxococcales(100)	Polyangiaceae(82)	unclassified(82)
Otu0272	0	0	2	0	3	0	0	1	0	0	0	0	0	1	Proteobacteria(100)	Betaproteobacteria(100)	Burkholderiales(100)	Oxalobacteraceae(91)	unclassified(91)
Otu0273	2	0	1	4	0	2	0	0	0	0	0	0	0	1	unclassified(100)	unclassified(100)	unclassified(100)	unclassified(100)	unclassified(100)
Otu0274	0	0	0	0	0	0	0	6	0	0	0	0	0	0	Proteobacteria(100)	Alphaproteobacteria(100)	Caulobacterales(100)	Caulobacteraceae(100)	unclassified(100)
Otu0275	0	0	0	0	0	0	0	0	0	4	0	0	0	0	Proteobacteria(100)	Betaproteobacteria(100)	Burkholderiales(100)	Burkholderiales_incertae_sedis(100)	Ideonella(100)
Otu0276	0	0	0	0	0	0	8	0	0	0	0	0	0	0	Proteobacteria(100)	unclassified(100)	unclassified(100)	unclassified(100)	unclassified(100)
Otu0277	0	0	10	0	0	0	0	0	0	0	0	0	0	0	Proteobacteria(100)	Alphaproteobacteria(100)	Sphingomonadales(100)	Sphingomonadaceae(100)	unclassified(100)
Otu0278	1	1	0	0	2	4	0	1	1	0	0	0	0	0	Actinobacteria(100)	Actinobacteria(100)	Actinomycetales(100)	unclassified(100)	unclassified(100)
Otu0279	1	3	1	0	2	0	0	0	0	1	0	0	0	0	Proteobacteria(100)	Alphaproteobacteria(100)	Rhizobiales(100)	unclassified(100)	unclassified(100)
Otu0280	0	0	0	0	0	0	1	0	4	2	0	0	0	0	Bacteroidetes(100)	Sphingobacteria(100)	Sphingobacteriales(100)	Chitinophagaceae(100)	Niabella(100)
Otu0281	0	0	0	4	0	1	0	0	0	0	0	1	1	1	Proteobacteria(100)	unclassified	unclassified	unclassified	unclassified
Otu0282	0	0	0	2	0	0	0	0	0	1	0	0	0	1	Deinococcus-Thermus(100)	Deinococci(100)	Deinococcales(100)	Deinococcaceae(100)	Deinococcus(100)
Otu0283	0	0	0	0	0	9	0	0	0	0	0	0	0	0	Proteobacteria(100)	Betaproteobacteria(100)	Burkholderiales(100)	Oxalobacteraceae(90)	unclassified(90)
Otu0284	0	0	0	2	0	2	2	0	0	2	0	0	0	0	Acidobacteria(100)	Acidobacteria_Gp1(100)	Acidobacteria_Gp1_order_incertae_sedis(100)	Acidobacteria_Gp1_family_incertae_sedis(100)	Gp1(100)
Otu0285	0	0	0	0	0	0	0	0	0	0	0	6	0	0	unclassified(100)	unclassified(100)	unclassified(100)	unclassified(100)	unclassified(100)
Otu0286	0	0	0	0	6	0	0	0	0	0	0	0	0	0	unclassified(100)	unclassified(100)	unclassified(100)	unclassified(100)	unclassified(100)
Otu0287	0	2	2	0	0	0	0	0	0	0	0	0	0	0	Firmicutes(100)	Bacilli(100)	Bacillales(100)	Alicyclobacillaceae(100)	Tumebacillus(100)
Otu0288	0	0	0	0	0	0	0	0	10	0	0	0	0	0	unclassified(100)	unclassified(100)	unclassified(100)	unclassified(100)	unclassified(100)
Otu0289	0	0	0	0	0	0	0	0	2	1	0	1	0	0	Proteobacteria(100)	Alphaproteobacteria(100)	Sphingomonadales(100)	Sphingomonadaceae(100)	Sphingomonas(100)
Otu0290	0	0	0	0	0	0	0	0	0	7	0	0	0	0	Proteobacteria(100)	Gammaproteobacteria(100)	Xanthomonadales(100)	Xanthomonadaceae(100)	unclassified(100)
Otu0291	0	6	0	0	0	0	0	0	0	0	0	0	0	0	unclassified(100)	unclassified(100)	unclassified(100)	unclassified(100)	unclassified(100)
Otu0292	0	4	0	0	0	0	4	0	0	0	0	0	0	0	Proteobacteria(100)	Betaproteobacteria(100)	Rhodocyclales(100)	Rhodocyclaceae(100)	unclassified(100)
Otu0293	0	0	0	0	0	0	0	0	9	0	0	0	0	0	Armatimonadetes(100)	Armatimonadia(100)	Armatimonadales(100)	Armatimonadaceae(100)	Armatimonas_Armatimonadetes_gp1(100)
Otu0294	0	2	0	0	0	1	0	1	0	0	0	1	0	0	unclassified(100)	unclassified(100)	unclassified(100)	unclassified(100)	unclassified(100)
Otu0295	0	0	0	0	0	0	0	0	0	0	0	4	0	0	Actinobacteria(100)	Actinobacteria(100)	Actinomycetales(100)	Thermomonosporaceae(100)	Actinomadura(100)
Otu0296	0	2	0	3	2	0	0	0	0	0	0	0	0	0	Firmicutes(100)	Bacilli(100)	Bacillales(100)	unclassified(56)	unclassified(56)
Otu0297	0	0	9	0	0	0	0	0	0	0	0	0	0	0	Proteobacteria(100)	Betaproteobacteria(100)	Burkholderiales(100)	unclassified(100)	unclassified(100)
Otu0298	3	0	0	0	0	0	0	0	0	0	0	1	0	0	Proteobacteria(100)	Alphaproteobacteria(100)	Rhizobiales(100)	unclassified(100)	unclassified(100)
Otu0299	0	0	0	1	0	0	0	0	1	0	0	0	0	0	Proteobacteria(100)	Alphaproteobacteria(100)	Caulobacterales(100)	Caulobacteraceae(100)	Caulobacter(89)
Otu0300	0	0	0	0	0	0	0	0	0	3	0	0	0	0	Proteobacteria(100)	Betaproteobacteria(100)	Burkholderiales(100)	Comamonadaceae(100)	unclassified(100)
Otu0301	3	0	0	0	1	0	0	0	0	0	0	2	0	0	unclassified(100)	unclassified(100)	unclassified(100)	unclassified(100)	unclassified(100)
Otu0302	0	0	0	0	0	0	0	0	0	0	4	2	0	0	Actinobacteria(100)	Actinobacteria(100)	Actinomycetales(100)	Streptomycetaceae(100)	Streptomyces(100)
Otu0303	0	1	0	2	0	0	0	0	0	0	0	1	0	0	Proteobacteria(100)	Alphaproteobacteria(100)	unclassified(100)	unclassified(100)	unclassified(100)
Otu0304	9	0	0	0	0	0	0	0	0	0	0	0	0	0	Firmicutes(78)	unclassified(78)	unclassified(78)	unclassified(78)	unclassified(78)
Otu0305	0	0	0	0	0	9	0	0	0	0	0	0	0	0	Proteobacteria(100)	Alphaproteobacteria(100)	Rhizobiales(100)	Phyllobacteriaceae(100)	unclassified(100)
Otu0306	0	0	0	0	6	0	0	0	0	0	0	0	0	1	Acidobacteria(100)	Acidobacteria_Gp3(100)	unclassified(100)	unclassified(100)	unclassified(100)
Otu0307	1	0	0	1	0	0	0	1	0	0	5	0	0	0	Proteobacteria(100)	Betaproteobacteria(100)	Burkholderiales(100)	Oxalobacteraceae(100)	Naxibacter(78)
Otu0308	0	1	1	1	0	0	0	0	0	0	2	0	2	0	unclassified(100)	unclassified(100)	unclassified(100)	unclassified(100)	unclassified(100)
Otu0309	0	0	0	0	0	0	0	0	9	0	0	0	0	0	Bacteroidetes(100)	unclassified(100)	unclassified(100)	unclassified(100)	unclassified(100)
Otu0310	0	0	0	0	0	0	0	0	9	0	0	0	0	0	Proteobacteria(100)	Alphaproteobacteria(100)	unclassified(100)	unclassified(100)	unclassified(100)
Otu0311	4	0	0	0	2	0	0	0	0	1	0	0	0	0	Proteobacteria(100)	Deltaproteobacteria(100)	Myxococcales(100)	unclassified(100)	unclassified(100)
Otu0312	0	0	0	0	0	0	0	0	9	0	0	0	0	0	Bacteroidetes(100)	Sphingobacteria(100)	Sphingobacteriales(100)	Chitinophagaceae(100)	unclassified(100)
Otu0313	1	0	0	0	0	0	0	0	0	0	1	1	0	0	Acidobacteria(100)	Acidobacteria_Gp10(100)	Acidobacteria_Gp10_order_incertae_sedis(100)	Acidobacteria_Gp10_family_incertae_sedis(100)	Gp10(100)
Otu0314	0	0	0	6	0	0	0	0	0	0	0	0	0	2	Proteobacteria(100)	unclassified(100)	unclassified(100)	unclassified(100)	unclassified(100)
Otu0315	0	0	0	0	0	0	1	0	0	0	1	0	4	0	Proteobacteria(100)	Alphaproteobacteria(100)	Rhizobiales(100)	Rhizobiaceae(100)	Rhizobium(100)
Otu0316	1	0	1	5	0	0	0	0	0	0	0	0	0	0	Firmicutes(100)	Bacilli(100)	Bacillales(100)	unclassified(100)	unclassified(100)
Otu0317	2	2	0	0	2	0	2	0	0	0	1	0	0	0	unclassified(100)	unclassified(100)	unclassified(100)	unclassified(100)	unclassified(100)
Otu0318	1	1	1	0	0	1	1	0	0	0	0	0	0	0	unclassified(100)	unclassified(100)	unclassified(100)	unclassified(100)	unclassified(100)
Otu0319	0	3	0	0	1	0	0	0	0	0	0	0	1	0	Proteobacteria(100)	Alphaproteobacteria(100)	Rhizobiales(100)	Hyphomicrobiaceae(100)	Hyphomicrobium(100)
Otu0320	0	3	0	0	0	0	0	1	0	0	0	0	0	0	Proteobacteria(100)	Alphaproteobacteria(100)	unclassified(100)	unclassified(100)	unclassified(100)
Otu0321	2	2	0	0	1	0	0	0	0	0	0	0	0	0	Proteobacteria(100)	Alphaproteobacteria(100)	Sphingomonadales(100)	Sphingomonadaceae(100)	unclassified(78)
Otu0322	0	0	0	0	0	3	1	0	0	0	5	0	0	0	Proteobacteria(100)	Gammaproteobacteria(100)	Legionellales(100)	Coxiellaceae(100)	Aquicella(100)
Otu0323	0	0	0	0	0	0	0	0	3	0	0	0	0	1	Proteobacteria(100)	Deltaproteobacteria(100)	unclassified(100)	unclassified(100)	unclassified(100)
Otu0324	0	2	0	0	0	0	0	0	0	0	0	0	0	0	Proteobacteria(100)	Alphaproteobacteria(100)	Sphingomonadales(100)	Sphingomonadaceae(100)	unclassified(100)
Otu0325	0	3	0	1	0	0	0	0	0	0	0	1	1	0	Actinobacteria(100)	Actinobacteria(100)	Actinomycetales(100)	Geodermatophilaceae(100)	Geodermatophilus(75)
Otu0326	0	1	0	0	0	0	0	0	0	2	0	0	0	0	Bacteroidetes(100)	Sphingobacteria(100)	Sphingobacteriales(100)	Cytophagaceae(100)	Rhodocytophaga(100)
Otu0327	0	2	0	0	0	0	0	1	0	0	0	1	0	0	Proteobacteria(100)	Alphaproteobacteria(100)	unclassified(100)	unclassified(100)	unclassified(100)
Otu0328	0	1	4	0	1	0	0	0	0	0	0	0	0	0	Proteobacteria(100)	Alphaproteobacteria(100)	Rhodospirillales(100)	Acetobacteraceae(100)	unclassified(100)
Otu0330	0	4	0	0	0	0	0	0	0	0	0	0	0	0	Proteobacteria(100)	Alphaproteobacteria(100)	Rhizobiales(100)	Bradyrhizobiaceae(100)	Afipia(100)
Otu0331	0	0	0	0	0	0	0	5	0	0	0	0	0	0	Bacteroidetes(100)	Sphingobacteria(100)	Sphingobacteriales(100)	Chitinophagaceae(100)	unclassified(100)
Otu0332	0	0	0	0	0	0	0	5	0	0	0	0	0	0	Proteobacteria(100)	Betaproteobacteria(100)	Burkholderiales(100)	unclassified(100)	unclassified(100)
Otu0333	0	0	0	0	0	0	0	2	0	0	0	0	1	0	unclassified(100)	unclassified(100)	unclassified(100)	unclassified(100)	unclassified(100)
Otu0334	0	5	0	0	0	0	0	0	0	0	0	0	0	0	Firmicutes(100)	Bacilli(100)	Bacillales(100)	Planococcaceae(100)	Lysinibacillus(100)
Otu0335	0	0	0	3	0	0	0	0	0	0	0	2	0	2	Proteobacteria(100)	Alphaproteobacteria(100)	Rhizobiales(100)	Rhizobiaceae(100)	Rhizobium(100)
Otu0336	0	0	0	0	0	0	0	0	0	0	2	0	0	0	Proteobacteria(100)	Betaproteobacteria(100)	Burkholderiales(100)	unclassified(100)	unclassified(100)
Otu0337	0	0	0	0	0	0	0	0	8	0	0	0	0	0	unclassified(100)	unclassified(100)	unclassified(100)	unclassified(100)	unclassified(100)
Otu0338	0	0	0	8	0	0	0	0	0	0	0	0	0	0	unclassified(100)	unclassified(100)	unclassified(100)	unclassified(100)	unclassified(100)
Otu0339	0	0	3	0	2	0	0	1	0	0	0	1	0	0	Proteobacteria(100)	Alphaproteobacteria(100)	Rhodospirillales(100)	Acetobacteraceae(100)	unclassified(100)
Otu0340	0	0	0	0	0	0	0	0	0	0	0	0	5	0	Proteobacteria(100)	unclassified(100)	unclassified(100)	unclassified(100)	unclassified(100)
Otu0341	0	0	0	3	0	0	0	0	0	0	5	0	0	0	Acidobacteria(100)	Acidobacteria_Gp3(100)	unclassified(100)	unclassified(100)	unclassified(100)
Otu0342	0	0	2	4	0	0	0	0	0	0	0	0	0	0	unclassified(100)	unclassified(100)	unclassified(100)	unclassified(100)	unclassified(100)
Otu0343	0	0	0	0	0	0	0	2	0	0	0	0	4	0	Firmicutes(100)	Bacilli(100)	Bacillales(100)	Paenibacillaceae_1(100)	Paenibacillus(100)
Otu0344	0	0	0	6	0	0	0	0	0	0	0	0	0	0	unclassified(100)	unclassified(100)	unclassified(100)	unclassified(100)	unclassified(100)
Otu0345	2	1	3	1	0	0	0	0	0	0	0	0	0	0	unclassified(100)	unclassified(100)	unclassified(100)	unclassified(100)	unclassified(100)
Otu0346	0	0	0	4	0	0	0	0	0	0	0	0	2	1	Proteobacteria(100)	Alphaproteobacteria(100)	Sphingomonadales(100)	Erythrobacteraceae(88)	Altererythrobacter(88)
Otu0347	8	0	0	0	0	0	0	0	0	0	0	0	0	0	unclassified(100)	unclassified(100)	unclassified(100)	unclassified(100)	unclassified(100)
Otu0348	0	0	0	0	0	0	4	0	0	0	0	0	0	0	Proteobacteria(100)	Alphaproteobacteria(100)	unclassified(100)	unclassified(100)	unclassified(100)
Otu0349	0	0	0	0	0	0	0	0	0	0	0	4	0	0	Proteobacteria(100)	Gammaproteobacteria(100)	Xanthomonadales(100)	Xanthomonadaceae(100)	unclassified(100)
Otu0350	1	0	0	0	5	0	0	0	0	0	0	0	0	0	Acidobacteria(100)	Acidobacteria_Gp1(100)	Acidobacteria_Gp1_order_incertae_sedis(100)	Acidobacteria_Gp1_family_incertae_sedis(100)	Gp1(100)
Otu0351	0	0	3	2	0	0	0	1	0	0	0	0	0	0	Proteobacteria(100)	Betaproteobacteria(100)	unclassified(100)	unclassified(100)	unclassified(100)
Otu0352	0	0	0	3	0	0	0	1	0	0	0	0	0	0	Proteobacteria(100)	Alphaproteobacteria(100)	Rhizobiales(100)	Xanthobacteraceae(100)	Pseudolabrys(100)
Otu0353	0	3	0	0	2	0	0	0	0	0	0	0	0	0	Proteobacteria(100)	Alphaproteobacteria(100)	unclassified(100)	unclassified(100)	unclassified(100)
Otu0354	0	0	1	1	0	0	0	0	0	2	0	3	0	0	Actinobacteria(100)	Actinobacteria(100)	Actinomycetales(100)	Mycobacteriaceae(100)	Mycobacterium(100)
Otu0355	0	3	3	0	0	0	0	0	0	0	0	0	0	0	Acidobacteria(100)	Acidobacteria_Gp5(100)	Acidobacteria_Gp5_order_incertae_sedis(100)	Acidobacteria_Gp5_family_incertae_sedis(100)	Gp5(100)
Otu0356	7	0	0	0	0	0	0	0	0	0	0	0	0	0	Proteobacteria(100)	Alphaproteobacteria(100)	Sphingomonadales(100)	Sphingomonadaceae(100)	unclassified(100)
Otu0357	0	0	8	0	0	0	0	0	0	0	0	0	0	0	Bacteroidetes(100)	Sphingobacteria(100)	Sphingobacteriales(100)	Chitinophagaceae(100)	unclassified(100)
Otu0358	0	0	1	0	2	4	0	0	0	0	0	0	0	0	Proteobacteria(100)	Betaproteobacteria(100)	unclassified(88)	unclassified(88)	unclassified(88)
Otu0359	0	0	8	0	0	0	0	0	0	0	0	0	0	0	Proteobacteria(100)	Alphaproteobacteria(100)	unclassified(100)	unclassified(100)	unclassified(100)
Otu0360	0	0	4	2	0	0	0	2	0	0	0	0	0	0	Proteobacteria(100)	Gammaproteobacteria(100)	Xanthomonadales(100)	Xanthomonadaceae(100)	unclassified(100)
Otu0361	0	0	0	0	0	0	0	0	0	0	0	0	0	8	Proteobacteria(100)	Alphaproteobacteria(100)	Rhizobiales(100)	unclassified(100)	unclassified(100)
Otu0362	0	2	0	1	0	0	0	0	1	0	0	0	0	0	Proteobacteria(100)	Betaproteobacteria(100)	unclassified(100)	unclassified(100)	unclassified(100)
Otu0363	2	0	0	0	0	0	4	0	0	0	0	0	0	0	Proteobacteria(100)	Betaproteobacteria(100)	Burkholderiales(72)	unclassified(72)	unclassified(72)
Otu0364	0	0	0	0	0	0	0	0	0	0	0	1	0	2	Proteobacteria(100)	Alphaproteobacteria(100)	Rhizobiales(100)	unclassified(100)	unclassified(100)
Otu0365	0	0	0	2	1	0	0	0	0	0	0	0	0	0	Firmicutes(100)	Bacilli(100)	unclassified(72)	unclassified(72)	unclassified(72)
Otu0366	0	0	0	4	0	0	0	0	0	0	0	0	0	0	unclassified(100)	unclassified(100)	unclassified(100)	unclassified(100)	unclassified(100)
Otu0367	0	0	0	0	1	0	5	0	0	0	0	0	0	0	Proteobacteria(100)	Alphaproteobacteria(100)	Sphingomonadales(100)	Sphingomonadaceae(100)	unclassified(100)
Otu0368	0	1	0	0	3	0	2	0	0	0	0	0	0	0	Acidobacteria(100)	Acidobacteria_Gp3(100)	Acidobacteria_Gp3_order_incetae_sedis(100)	Acidobacteria_Gp3_family_incetae_sedis(100)	Bryobacter(100)
Otu0369	4	0	0	0	0	0	0	2	0	0	0	0	0	0	Firmicutes(100)	Bacilli(100)	Bacillales(100)	Paenibacillaceae_1(100)	Paenibacillus(100)
Otu0370	0	0	0	0	0	0	0	0	0	0	7	0	0	0	Proteobacteria(100)	unclassified(100)	unclassified(100)	unclassified(100)	unclassified(100)
Otu0371	0	0	0	0	0	0	0	0	0	1	0	0	0	0	Bacteroidetes(100)	Sphingobacteria(100)	Sphingobacteriales(100)	Chitinophagaceae(100)	unclassified(100)
Otu0372	0	0	0	0	0	0	0	0	0	4	0	0	0	0	Proteobacteria(100)	Alphaproteobacteria(100)	Rhizobiales(100)	Rhizobiales_incertae_sedis(100)	Bauldia(100)
Otu0373	0	0	0	0	0	1	4	0	0	0	0	0	1	0	Proteobacteria(100)	Alphaproteobacteria(100)	Sphingomonadales(100)	Sphingomonadaceae(100)	Sphingomonas(100)
Otu0374	0	4	0	0	0	0	0	0	0	0	0	0	0	0	unclassified(100)	unclassified(100)	unclassified(100)	unclassified(100)	unclassified(100)
Otu0375	1	0	0	0	0	0	0	0	0	1	0	2	0	0	unclassified(72)	unclassified(72)	unclassified(72)	unclassified(72)	unclassified(72)
Otu0376	0	3	0	0	0	0	0	0	0	0	0	1	0	0	Proteobacteria(100)	Gammaproteobacteria(100)	unclassified(100)	unclassified(100)	unclassified(100)
Otu0377	0	0	1	5	0	0	0	0	0	0	0	0	0	0	unclassified(100)	unclassified(100)	unclassified(100)	unclassified(100)	unclassified(100)
Otu0378	0	0	0	0	3	0	0	0	0	0	0	0	0	0	unclassified(100)	unclassified(100)	unclassified(100)	unclassified(100)	unclassified(100)
Otu0379	0	0	0	0	0	0	0	0	1	0	0	0	1	0	Proteobacteria(100)	Betaproteobacteria(100)	Burkholderiales(100)	Oxalobacteraceae(100)	unclassified(100)
Otu0380	0	0	0	0	0	2	0	1	0	0	0	0	0	0	Proteobacteria(100)	Betaproteobacteria(100)	Burkholderiales(100)	unclassified(72)	unclassified(72)
Otu0381	0	0	0	0	4	0	0	0	0	0	0	0	0	0	unclassified(100)	unclassified(100)	unclassified(100)	unclassified(100)	unclassified(100)
Otu0382	0	0	0	6	0	0	0	0	0	0	0	0	0	0	unclassified(100)	unclassified(100)	unclassified(100)	unclassified(100)	unclassified(100)
Otu0383	2	0	0	1	0	0	0	0	0	0	0	1	2	0	unclassified(58)	unclassified(58)	unclassified(58)	unclassified(58)	unclassified(58)
Otu0384	0	0	0	0	0	1	4	0	1	0	0	0	0	0	Proteobacteria(100)	Alphaproteobacteria(100)	unclassified(100)	unclassified(100)	unclassified(100)
Otu0385	0	0	0	0	0	0	0	0	0	4	0	0	0	0	Proteobacteria(100)	unclassified(100)	unclassified(100)	unclassified(100)	unclassified(100)
Otu0386	0	4	0	0	0	0	0	0	0	0	0	0	0	0	Proteobacteria(100)	Gammaproteobacteria(100)	Xanthomonadales(100)	Xanthomonadaceae(100)	unclassified(100)
Otu0387	0	0	0	0	0	0	0	5	0	0	0	0	0	0	Proteobacteria(100)	unclassified(100)	unclassified(100)	unclassified(100)	unclassified(100)
Otu0388	0	3	0	0	0	0	0	0	0	0	0	0	0	0	unclassified(100)	unclassified(100)	unclassified(100)	unclassified(100)	unclassified(100)
Otu0389	0	0	0	0	3	0	0	0	0	0	0	0	0	0	Acidobacteria(100)	Acidobacteria_Gp3(100)	Acidobacteria_Gp3_order_incertae_sedis(100)	Acidobacteria_Gp3_family_incertae_sedis(100)	Gp3(100)
Otu0390	0	0	0	0	0	0	0	0	0	0	4	1	0	0	Proteobacteria(100)	Betaproteobacteria(100)	Burkholderiales(100)	Oxalobacteraceae(100)	unclassified(100)
Otu0391	0	0	0	6	0	0	0	0	0	0	0	0	0	0	unclassified(100)	unclassified(100)	unclassified(100)	unclassified(100)	unclassified(100)
Otu0392	0	0	0	0	0	0	0	0	0	4	0	0	1	0	Bacteroidetes(100)	Sphingobacteria(100)	Sphingobacteriales(100)	Chitinophagaceae(100)	Niabella(100)
Otu0393	0	0	0	0	4	0	0	0	0	0	2	0	0	0	Proteobacteria(100)	Alphaproteobacteria(100)	Rhizobiales(100)	unclassified(72)	unclassified(72)
Otu0394	1	1	0	0	2	0	0	0	0	0	0	0	0	0	Verrucomicrobia(100)	Subdivision3(100)	Subdivision3_order_incertae_sedis(100)	Subdivision3_family_incertae_sedis(100)	3_genus_incertae_sedis(100)
Otu0395	0	0	0	0	0	0	0	0	0	0	0	4	0	0	Proteobacteria(100)	Betaproteobacteria(100)	unclassified(86)	unclassified(86)	unclassified(86)
Otu0396	0	0	0	0	0	6	0	0	0	0	0	0	0	0	Proteobacteria(100)	unclassified(100)	unclassified(100)	unclassified(100)	unclassified(100)
Otu0397	0	0	0	0	0	0	0	0	0	0	0	3	0	0	Proteobacteria(100)	Betaproteobacteria(100)	Burkholderiales(100)	unclassified(100)	unclassified(100)
Otu0398	0	0	0	0	0	0	0	0	6	0	0	0	0	0	Proteobacteria(100)	Betaproteobacteria(100)	unclassified(100)	unclassified(100)	unclassified(100)
Otu0399	0	0	0	0	0	7	0	0	0	0	0	0	0	0	Proteobacteria(100)	unclassified(100)	unclassified(100)	unclassified(100)	unclassified(100)
Otu0400	0	0	0	0	0	0	0	0	0	0	0	4	0	0	Bacteroidetes(100)	Sphingobacteria(100)	Sphingobacteriales(100)	Chitinophagaceae(100)	unclassified(100)
Otu0401	7	0	0	0	0	0	0	0	0	0	0	0	0	0	Firmicutes(100)	Bacilli(100)	unclassified(100)	unclassified(100)	unclassified(100)
Otu0402	0	4	0	0	0	0	0	0	0	0	0	0	0	0	Proteobacteria(100)	Alphaproteobacteria(100)	Rhodospirillales(100)	Acetobacteraceae(100)	unclassified(100)
Otu0403	0	0	0	6	0	0	0	0	0	0	0	0	0	0	Acidobacteria(100)	Acidobacteria_Gp3(100)	Acidobacteria_Gp3_order_incetae_sedis(100)	Acidobacteria_Gp3_family_incetae_sedis(100)	Bryobacter(100)
Otu0404	0	0	0	0	0	0	0	0	0	0	0	3	0	0	Proteobacteria(100)	Alphaproteobacteria(100)	unclassified(100)	unclassified(100)	unclassified(100)
Otu0405	0	0	0	0	0	0	0	0	0	4	0	0	0	0	Bacteroidetes(100)	Sphingobacteria(100)	Sphingobacteriales(100)	Chitinophagaceae(100)	Niabella(100)
Otu0406	0	0	0	0	0	0	6	0	0	0	0	0	0	0	Proteobacteria(100)	unclassified(100)	unclassified(100)	unclassified(100)	unclassified(100)
Otu0407	0	0	0	0	0	0	4	0	0	0	0	0	0	0	Proteobacteria(100)	unclassified(100)	unclassified(100)	unclassified(100)	unclassified(100)
Otu0408	0	0	0	0	0	0	0	0	0	0	0	0	0	4	unclassified(100)	unclassified(100)	unclassified(100)	unclassified(100)	unclassified(100)
Otu0409	0	0	0	0	0	0	6	0	0	0	0	0	0	0	unclassified(100)	unclassified(100)	unclassified(100)	unclassified(100)	unclassified(100)
Otu0410	0	0	2	0	1	0	0	0	0	0	0	3	0	0	Proteobacteria(100)	Alphaproteobacteria(100)	Rhizobiales(100)	unclassified(58)	unclassified(58)
Otu0411	0	1	1	0	1	3	0	0	0	0	0	0	0	0	unclassified(100)	unclassified(100)	unclassified(100)	unclassified(100)	unclassified(100)
Otu0412	0	2	0	0	0	0	0	0	0	0	0	0	0	0	Proteobacteria(100)	Betaproteobacteria(100)	Burkholderiales(100)	unclassified(100)	unclassified(100)
Otu0413	0	0	0	1	1	0	1	0	0	0	0	1	1	0	unclassified(100)	unclassified(100)	unclassified(100)	unclassified(100)	unclassified(100)
Otu0414	0	1	1	1	1	1	0	0	0	0	0	0	0	0	Proteobacteria(100)	Alphaproteobacteria(100)	Rhodobacterales(100)	Rhodobacteraceae(100)	Amaricoccus(100)
Otu0415	0	0	3	0	0	0	0	0	2	0	0	0	0	0	unclassified(100)	unclassified(100)	unclassified(100)	unclassified(100)	unclassified(100)
Otu0416	0	3	0	0	0	0	0	0	0	0	0	0	0	0	unclassified(100)	unclassified(100)	unclassified(100)	unclassified(100)	unclassified(100)
Otu0417	0	0	0	0	0	0	0	2	0	0	0	0	0	0	Proteobacteria(100)	unclassified(100)	unclassified(100)	unclassified(100)	unclassified(100)
Otu0418	0	2	0	0	0	0	0	0	0	0	0	3	0	0	Acidobacteria(100)	Acidobacteria_Gp3(100)	Acidobacteria_Gp3_order_incetae_sedis(58)	Acidobacteria_Gp3_family_incetae_sedis(58)	Bryobacter(58)
Otu0419	0	0	0	0	0	0	0	3	0	0	0	0	0	0	Proteobacteria(100)	Alphaproteobacteria(100)	unclassified(100)	unclassified(100)	unclassified(100)
Otu0420	0	0	0	0	0	0	0	0	0	0	6	0	1	0	Proteobacteria(100)	Betaproteobacteria(100)	unclassified(100)	unclassified(100)	unclassified(100)
Otu0421	0	0	0	0	0	0	0	0	0	0	0	0	7	0	Proteobacteria(100)	Alphaproteobacteria(100)	unclassified(100)	unclassified(100)	unclassified(100)
Otu0422	0	0	0	0	0	0	5	0	0	0	0	0	0	1	Proteobacteria(100)	Alphaproteobacteria(100)	Caulobacterales(100)	Caulobacteraceae(100)	Brevundimonas(72)
Otu0423	0	0	0	0	0	6	0	0	0	0	0	0	0	0	Proteobacteria(100)	unclassified(100)	unclassified(100)	unclassified(100)	unclassified(100)
Otu0424	0	0	0	0	0	0	0	0	0	6	0	0	0	1	Proteobacteria(100)	Alphaproteobacteria(100)	Rhizobiales(100)	unclassified(100)	unclassified(100)
Otu0425	0	0	0	0	0	0	0	0	0	3	0	0	0	0	Proteobacteria(100)	unclassified(100)	unclassified(100)	unclassified(100)	unclassified(100)
Otu0426	0	4	2	0	0	0	0	0	0	0	0	0	0	0	Proteobacteria(100)	Deltaproteobacteria(100)	Myxococcales(100)	unclassified(86)	unclassified(86)
Otu0427	0	0	0	5	0	0	0	0	0	0	0	0	1	0	Bacteroidetes(100)	Sphingobacteria(100)	Sphingobacteriales(100)	Chitinophagaceae(100)	unclassified(100)
Otu0428	0	0	0	1	1	0	1	0	0	0	0	0	0	0	Proteobacteria(100)	Alphaproteobacteria(84)	unclassified(84)	unclassified(84)	unclassified(84)
Otu0429	0	0	0	0	0	0	0	0	0	0	0	0	6	0	Proteobacteria(100)	unclassified(100)	unclassified(100)	unclassified(100)	unclassified(100)
Otu0430	0	0	0	0	0	0	0	0	0	5	0	0	0	0	Proteobacteria(100)	unclassified(100)	unclassified(100)	unclassified(100)	unclassified(100)
Otu0431	0	0	0	0	0	0	0	0	0	3	0	0	0	0	Firmicutes(100)	Bacilli(100)	Bacillales(100)	Paenibacillaceae_1(100)	Paenibacillus(100)
Otu0432	0	0	0	0	0	6	0	0	0	0	0	0	0	0	unclassified(100)	unclassified(100)	unclassified(100)	unclassified(100)	unclassified(100)
Otu0433	0	0	0	0	3	0	0	0	0	0	0	0	0	0	Acidobacteria(67)	Acidobacteria_Gp3(67)	unclassified(67)	unclassified(67)	unclassified(67)
Otu0434	0	0	0	0	0	0	0	0	0	4	0	0	0	0	Proteobacteria(100)	Gammaproteobacteria(100)	Xanthomonadales(100)	Xanthomonadaceae(100)	unclassified(100)
Otu0435	3	0	0	0	1	0	0	1	0	0	0	0	0	0	Proteobacteria(100)	Deltaproteobacteria(100)	Bdellovibrionales(100)	Bacteriovoracaceae(100)	Peredibacter(100)
Otu0436	0	1	0	0	0	0	0	0	0	0	0	2	0	0	Proteobacteria(100)	Alphaproteobacteria(100)	Caulobacterales(100)	Hyphomonadaceae(100)	unclassified(100)
Otu0437	0	0	0	0	0	0	0	0	0	0	0	1	0	3	Actinobacteria(100)	Actinobacteria(100)	Actinomycetales(100)	Streptomycetaceae(100)	unclassified(100)
Otu0438	0	0	0	0	0	0	0	4	0	0	0	0	0	0	Proteobacteria(100)	unclassified(100)	unclassified(100)	unclassified(100)	unclassified(100)
Otu0439	0	0	0	0	0	0	0	3	0	0	0	0	0	0	Gemmatimonadetes(100)	Gemmatimonadetes(100)	Gemmatimonadales(100)	Gemmatimonadaceae(100)	Gemmatimonas(100)
Otu0440	0	0	0	0	0	0	0	0	0	0	0	0	2	3	Proteobacteria(100)	Betaproteobacteria(100)	Burkholderiales(100)	Oxalobacteraceae(100)	unclassified(100)
Otu0441	0	0	0	0	0	0	0	3	0	0	0	0	0	0	Proteobacteria(100)	Betaproteobacteria(100)	Burkholderiales(100)	unclassified(100)	unclassified(100)
Otu0442	0	0	0	0	0	0	0	1	0	0	0	0	0	0	Proteobacteria(100)	unclassified(100)	unclassified(100)	unclassified(100)	unclassified(100)
Otu0443	0	0	0	0	0	0	0	1	0	0	0	0	0	0	Proteobacteria(100)	Betaproteobacteria(100)	Burkholderiales(100)	Burkholderiaceae(100)	Burkholderia(100)
Otu0445	1	0	2	0	0	0	0	0	0	0	0	0	0	0	Acidobacteria(100)	Acidobacteria_Gp3(100)	Acidobacteria_Gp3_order_incertae_sedis(67)	Acidobacteria_Gp3_family_incertae_sedis(67)	Gp3(67)
Otu0447	0	0	0	0	1	2	1	1	0	0	0	0	0	0	Proteobacteria(100)	Betaproteobacteria(100)	Burkholderiales(67)	unclassified(67)	unclassified(67)
Otu0448	0	0	0	0	0	0	0	0	0	0	0	3	0	0	Proteobacteria(100)	Betaproteobacteria(100)	Burkholderiales(100)	Oxalobacteraceae(100)	unclassified(100)
Otu0449	0	0	0	1	0	2	0	0	0	1	0	0	0	0	Proteobacteria(100)	Gammaproteobacteria(100)	Pseudomonadales(100)	Pseudomonadaceae(100)	Pseudomonas(100)
Otu0450	0	0	0	0	0	0	0	0	0	0	0	4	0	0	unclassified(100)	unclassified(100)	unclassified(100)	unclassified(100)	unclassified(100)
Otu0451	0	0	0	0	0	0	0	0	0	0	0	3	0	0	Bacteroidetes(100)	Sphingobacteria(100)	Sphingobacteriales(100)	Chitinophagaceae(100)	unclassified(100)
Otu0452	0	0	0	0	0	0	0	0	0	0	4	0	0	0	Proteobacteria(100)	Betaproteobacteria(100)	unclassified(67)	unclassified(67)	unclassified(67)
Otu0453	0	0	0	0	0	0	2	2	2	0	0	0	0	0	Bacteroidetes(100)	unclassified(100)	unclassified(100)	unclassified(100)	unclassified(100)
Otu0455	0	0	0	0	1	0	1	0	0	0	0	0	0	0	Bacteroidetes(100)	Sphingobacteria(100)	Sphingobacteriales(100)	Chitinophagaceae(100)	unclassified(100)
Otu0456	0	0	0	0	0	0	0	0	0	0	0	2	0	0	Bacteroidetes(100)	Sphingobacteria(100)	Sphingobacteriales(100)	Chitinophagaceae(100)	unclassified(100)
Otu0457	0	0	0	0	2	0	0	0	1	0	0	0	0	0	unclassified(100)	unclassified(100)	unclassified(100)	unclassified(100)	unclassified(100)
Otu0458	0	0	0	1	1	0	1	0	0	0	0	0	0	0	Acidobacteria(100)	Acidobacteria_Gp1(100)	Acidobacteria_Gp1_order_incertae_sedis(100)	Acidobacteria_Gp1_family_incertae_sedis(100)	Gp1(100)
Otu0459	0	0	0	0	0	0	0	0	0	0	0	0	3	0	Proteobacteria(100)	Betaproteobacteria(100)	Burkholderiales(100)	Burkholderiaceae(100)	Ralstonia(100)
Otu0460	0	0	0	0	0	0	0	0	0	0	6	0	0	0	unclassified(100)	unclassified(100)	unclassified(100)	unclassified(100)	unclassified(100)
Otu0461	0	0	0	0	0	0	0	0	0	0	6	0	0	0	unclassified(100)	unclassified(100)	unclassified(100)	unclassified(100)	unclassified(100)
Otu0462	0	0	0	0	0	0	0	0	0	0	6	0	0	0	unclassified(100)	unclassified(100)	unclassified(100)	unclassified(100)	unclassified(100)
Otu0463	0	0	0	0	0	0	1	0	0	0	0	1	0	0	Proteobacteria(100)	Gammaproteobacteria(100)	unclassified(100)	unclassified(100)	unclassified(100)
Otu0464	0	0	6	0	0	0	0	0	0	0	0	0	0	0	Bacteroidetes(100)	Sphingobacteria(100)	Sphingobacteriales(100)	Chitinophagaceae(100)	unclassified(100)
Otu0465	0	0	0	0	0	0	0	0	0	0	6	0	0	0	Proteobacteria(100)	Alphaproteobacteria(100)	Rhizobiales(100)	unclassified(100)	unclassified(100)
Otu0466	0	0	0	0	0	4	1	0	0	0	0	0	0	0	Proteobacteria(100)	Betaproteobacteria(100)	Burkholderiales(100)	Oxalobacteraceae(100)	unclassified(100)
Otu0467	1	0	0	2	0	0	0	0	0	0	0	0	0	0	Actinobacteria(100)	Actinobacteria(100)	Actinomycetales(100)	Mycobacteriaceae(100)	Mycobacterium(100)
Otu0468	0	0	0	6	0	0	0	0	0	0	0	0	0	0	unclassified(100)	unclassified(100)	unclassified(100)	unclassified(100)	unclassified(100)
Otu0469	0	0	0	0	2	0	0	0	0	0	0	0	0	0	Proteobacteria(100)	Betaproteobacteria(100)	Burkholderiales(100)	Burkholderiaceae(100)	Burkholderia(100)
Otu0470	0	0	3	0	0	0	0	0	0	1	0	0	0	0	Proteobacteria(100)	Alphaproteobacteria(100)	Rhodospirillales(100)	Rhodospirillaceae(100)	Skermanella(100)
Otu0471	0	0	1	0	0	0	0	0	0	0	2	0	0	0	Acidobacteria(100)	Acidobacteria_Gp10(100)	Acidobacteria_Gp10_order_incertae_sedis(100)	Acidobacteria_Gp10_family_incertae_sedis(100)	Gp10(100)
Otu0472	0	0	0	0	0	0	0	0	0	2	0	0	0	0	Proteobacteria(100)	Betaproteobacteria(100)	Burkholderiales(100)	unclassified(100)	unclassified(100)
Otu0473	0	4	0	0	0	0	0	0	0	0	0	0	0	0	Proteobacteria(100)	Betaproteobacteria(100)	Burkholderiales(100)	unclassified(100)	unclassified(100)
Otu0474	6	0	0	0	0	0	0	0	0	0	0	0	0	0	Firmicutes(100)	Bacilli(100)	Bacillales(100)	Planococcaceae(100)	unclassified(100)
Otu0475	0	2	0	0	0	0	0	0	0	0	0	0	0	0	unclassified(100)	unclassified(100)	unclassified(100)	unclassified(100)	unclassified(100)
Otu0476	0	0	0	0	3	0	0	0	0	0	0	0	0	0	Proteobacteria(100)	Alphaproteobacteria(100)	Sphingomonadales(100)	Sphingomonadaceae(100)	unclassified(100)
Otu0477	0	0	0	0	0	1	1	0	0	0	0	0	0	0	unclassified(100)	unclassified(100)	unclassified(100)	unclassified(100)	unclassified(100)
Otu0478	0	0	0	0	1	0	0	0	0	0	0	0	0	0	Actinobacteria(100)	Actinobacteria(100)	Actinomycetales(100)	unclassified(100)	unclassified(100)
Otu0479	0	0	0	0	0	0	0	0	0	0	3	0	0	1	Proteobacteria(100)	Gammaproteobacteria(100)	Xanthomonadales(100)	Xanthomonadaceae(100)	unclassified(100)
Otu0480	0	0	0	0	0	1	0	0	0	0	1	0	0	0	unclassified(100)	unclassified(100)	unclassified(100)	unclassified(100)	unclassified(100)
Otu0481	0	0	0	0	5	0	0	0	0	0	0	0	0	0	Proteobacteria(100)	Alphaproteobacteria(100)	unclassified(100)	unclassified(100)	unclassified(100)
Otu0482	0	1	0	0	1	0	1	0	0	0	1	0	0	0	Actinobacteria(100)	Actinobacteria(100)	Actinomycetales(100)	Kineosporiaceae(67)	unclassified(67)
Otu0483	0	1	1	4	0	0	0	0	0	0	0	0	0	0	Proteobacteria(100)	Alphaproteobacteria(100)	Rhodospirillales(100)	Acetobacteraceae(100)	unclassified(100)
Otu0484	5	0	0	1	0	0	0	0	0	0	0	0	0	0	Proteobacteria(100)	Alphaproteobacteria(100)	Rhodospirillales(100)	Rhodospirillaceae(100)	Desertibacter(100)
Otu0485	2	0	0	0	0	0	0	0	0	0	0	0	0	0	Proteobacteria(100)	Alphaproteobacteria(100)	Sphingomonadales(100)	Sphingomonadaceae(100)	Sphingomonas(100)
Otu0486	0	0	0	0	0	0	0	0	6	0	0	0	0	0	Proteobacteria(100)	Betaproteobacteria(100)	Burkholderiales(100)	Oxalobacteraceae(100)	unclassified(100)
Otu0487	0	0	0	0	0	1	2	0	3	0	0	0	0	0	Proteobacteria(100)	Alphaproteobacteria(100)	Sphingomonadales(67)	unclassified(67)	unclassified(67)
Otu0488	0	0	0	0	0	0	5	0	0	0	0	0	0	0	Proteobacteria(100)	Alphaproteobacteria(100)	unclassified(100)	unclassified(100)	unclassified(100)
Otu0489	0	0	0	0	0	0	4	0	0	0	0	0	0	0	unclassified(100)	unclassified(100)	unclassified(100)	unclassified(100)	unclassified(100)
Otu0490	0	0	0	0	0	0	0	0	0	0	0	0	0	6	Actinobacteria(100)	Actinobacteria(100)	Actinomycetales(100)	Pseudonocardiaceae(100)	Pseudonocardia(100)
Otu0491	0	0	2	0	0	0	0	0	2	0	0	0	0	0	unclassified(100)	unclassified(100)	unclassified(100)	unclassified(100)	unclassified(100)
Otu0492	0	0	0	1	0	0	2	0	1	0	0	1	0	0	Proteobacteria(100)	Alphaproteobacteria(100)	Sphingomonadales(100)	Sphingomonadaceae(100)	Sphingomonas(100)
Otu0493	0	0	2	0	0	0	0	0	0	0	0	4	0	0	Actinobacteria(100)	Actinobacteria(100)	Solirubrobacterales(100)	unclassified(100)	unclassified(100)
Otu0494	2	0	0	0	2	0	0	0	0	0	0	0	0	0	Actinobacteria(67)	Actinobacteria(67)	unclassified(67)	unclassified(67)	unclassified(67)
Otu0495	0	0	0	0	0	0	0	0	0	3	0	0	0	0	unclassified(100)	unclassified(100)	unclassified(100)	unclassified(100)	unclassified(100)
Otu0496	0	0	0	2	2	0	0	0	0	0	0	0	0	0	unclassified(100)	unclassified(100)	unclassified(100)	unclassified(100)	unclassified(100)
Otu0497	6	0	0	0	0	0	0	0	0	0	0	0	0	0	unclassified(100)	unclassified(100)	unclassified(100)	unclassified(100)	unclassified(100)
Otu0498	0	0	0	4	0	0	0	0	0	1	0	0	0	0	Acidobacteria(100)	Acidobacteria_Gp3(100)	Acidobacteria_Gp3_order_incertae_sedis(100)	Acidobacteria_Gp3_family_incertae_sedis(100)	Gp3(100)
Otu0499	2	0	0	0	0	0	0	0	0	0	0	0	0	0	unclassified(100)	unclassified(100)	unclassified(100)	unclassified(100)	unclassified(100)
Otu0500	1	3	0	0	0	0	0	0	0	0	0	0	0	0	unclassified(100)	unclassified(100)	unclassified(100)	unclassified(100)	unclassified(100)
Otu0501	0	0	2	1	0	2	0	0	0	0	0	0	0	0	unclassified(67)	unclassified(67)	unclassified(67)	unclassified(67)	unclassified(67)
Otu0502	0	0	0	2	0	0	0	0	0	0	3	0	0	0	Proteobacteria(100)	Alphaproteobacteria(100)	Rhizobiales(100)	unclassified(100)	unclassified(100)
Otu0503	0	0	1	1	0	1	0	0	0	0	0	0	0	3	Proteobacteria(100)	unclassified(100)	unclassified(100)	unclassified(100)	unclassified(100)
Otu0504	6	0	0	0	0	0	0	0	0	0	0	0	0	0	unclassified(100)	unclassified(100)	unclassified(100)	unclassified(100)	unclassified(100)
Otu0505	0	0	0	0	0	0	0	0	0	0	5	0	0	0	Proteobacteria(100)	Betaproteobacteria(100)	Burkholderiales(100)	unclassified(100)	unclassified(100)
Otu0506	1	0	0	1	0	0	0	0	0	0	0	1	0	0	unclassified(100)	unclassified(100)	unclassified(100)	unclassified(100)	unclassified(100)
Otu0508	4	0	0	0	0	0	0	0	0	0	0	0	0	0	Bacteroidetes(100)	Sphingobacteria(100)	Sphingobacteriales(100)	unclassified(100)	unclassified(100)
Otu0509	0	0	0	5	0	0	0	0	0	0	0	0	0	0	Proteobacteria(100)	unclassified(100)	unclassified(100)	unclassified(100)	unclassified(100)
Otu0510	0	0	0	0	0	0	0	0	0	0	5	0	0	0	unclassified(100)	unclassified(100)	unclassified(100)	unclassified(100)	unclassified(100)
Otu0511	0	0	0	0	0	0	0	2	0	0	0	0	0	0	Proteobacteria(100)	Alphaproteobacteria(100)	unclassified(100)	unclassified(100)	unclassified(100)
Otu0512	0	0	0	0	0	0	0	2	0	0	0	0	0	0	Proteobacteria(100)	Betaproteobacteria(100)	Burkholderiales(100)	unclassified(100)	unclassified(100)
Otu0513	0	0	3	0	0	0	0	0	0	0	0	0	0	1	unclassified(100)	unclassified(100)	unclassified(100)	unclassified(100)	unclassified(100)
Otu0514	0	0	0	0	0	1	0	0	0	0	0	0	0	0	Proteobacteria(100)	Alphaproteobacteria(100)	Sphingomonadales(100)	Sphingomonadaceae(100)	unclassified(100)
Otu0515	0	0	0	0	0	0	0	0	0	0	5	0	0	0	unclassified(100)	unclassified(100)	unclassified(100)	unclassified(100)	unclassified(100)
Otu0516	0	0	0	0	0	0	0	4	0	0	0	0	0	0	Proteobacteria(100)	Alphaproteobacteria(100)	Rhizobiales(100)	unclassified(100)	unclassified(100)
Otu0517	0	0	0	5	0	0	0	0	0	0	0	0	0	0	unclassified(100)	unclassified(100)	unclassified(100)	unclassified(100)	unclassified(100)
Otu0518	0	0	0	0	3	0	0	0	0	0	0	0	0	0	unclassified(100)	unclassified(100)	unclassified(100)	unclassified(100)	unclassified(100)
Otu0519	1	0	0	4	0	0	0	0	0	0	0	0	0	0	Bacteroidetes(100)	Sphingobacteria(100)	Sphingobacteriales(100)	Chitinophagaceae(100)	Segetibacter(100)
Otu0520	2	0	1	0	0	0	0	0	0	0	0	0	0	0	unclassified(100)	unclassified(100)	unclassified(100)	unclassified(100)	unclassified(100)
Otu0521	3	0	0	1	0	0	0	0	1	0	0	0	0	0	unclassified(100)	unclassified(100)	unclassified(100)	unclassified(100)	unclassified(100)
Otu0522	0	0	0	0	0	0	0	0	0	0	0	2	0	0	Proteobacteria(100)	Alphaproteobacteria(100)	unclassified(100)	unclassified(100)	unclassified(100)
Otu0523	0	0	3	0	0	0	0	0	0	0	2	0	0	0	Deinococcus-Thermus(100)	Deinococci(100)	Deinococcales(100)	Deinococcaceae(100)	unclassified(100)
Otu0524	0	0	0	4	0	0	0	0	0	0	0	0	0	0	Proteobacteria(100)	Alphaproteobacteria(100)	Rhodospirillales(100)	unclassified(100)	unclassified(100)
Otu0525	0	0	0	1	1	0	1	0	0	0	0	0	0	0	Acidobacteria(100)	Acidobacteria_Gp1(100)	Acidobacteria_Gp1_order_incertae_sedis(100)	Acidobacteria_Gp1_family_incertae_sedis(100)	Gp1(100)
Otu0526	0	0	0	0	0	0	0	0	0	2	0	0	0	0	Deinococcus-Thermus(100)	Deinococci(100)	Deinococcales(100)	Deinococcaceae(100)	Deinococcus(100)
Otu0527	0	3	0	1	0	0	0	0	0	0	0	0	0	0	Proteobacteria(100)	Alphaproteobacteria(100)	Rhizobiales(100)	Methylobacteriaceae(100)	Methylobacterium(100)
Otu0528	0	0	1	1	0	0	0	0	0	0	0	0	0	0	unclassified(100)	unclassified(100)	unclassified(100)	unclassified(100)	unclassified(100)
Otu0529	0	0	0	0	3	0	0	0	0	0	0	0	0	0	unclassified(100)	unclassified(100)	unclassified(100)	unclassified(100)	unclassified(100)
Otu0530	0	0	0	0	3	0	0	0	0	0	0	0	0	0	unclassified(100)	unclassified(100)	unclassified(100)	unclassified(100)	unclassified(100)
Otu0531	0	0	0	0	3	0	0	0	0	0	0	0	0	0	Proteobacteria(100)	unclassified(100)	unclassified(100)	unclassified(100)	unclassified(100)
Otu0532	0	0	0	0	0	0	0	5	0	0	0	0	0	0	Proteobacteria(100)	Betaproteobacteria(100)	Burkholderiales(100)	unclassified(100)	unclassified(100)
Otu0533	0	0	0	0	4	0	0	0	0	0	0	0	0	0	Proteobacteria(100)	Alphaproteobacteria(100)	Rhodospirillales(100)	Acetobacteraceae(100)	unclassified(100)
Otu0534	0	0	0	0	0	0	0	0	0	0	0	1	0	0	Actinobacteria(100)	Actinobacteria(100)	Actinomycetales(100)	unclassified(100)	unclassified(100)
Otu0535	0	0	0	0	3	0	0	0	0	0	0	0	0	0	Firmicutes(100)	Bacilli(100)	unclassified(100)	unclassified(100)	unclassified(100)
Otu0536	0	0	0	0	0	0	0	0	0	0	0	1	0	0	Proteobacteria(100)	Alphaproteobacteria(100)	Rhodospirillales(100)	Acetobacteraceae(100)	unclassified(100)
Otu0537	0	0	0	0	0	0	0	1	0	0	0	0	0	0	Proteobacteria(100)	Gammaproteobacteria(100)	Xanthomonadales(100)	Xanthomonadaceae(100)	unclassified(100)
Otu0538	0	0	0	0	0	0	0	2	0	0	0	0	0	0	Proteobacteria(100)	Gammaproteobacteria(100)	Xanthomonadales(100)	Xanthomonadaceae(100)	unclassified(100)
Otu0539	0	0	0	0	0	0	0	1	0	0	0	0	0	0	Proteobacteria(100)	unclassified(100)	unclassified(100)	unclassified(100)	unclassified(100)
Otu0540	1	0	0	2	1	0	0	0	0	0	0	0	0	0	Proteobacteria(100)	Betaproteobacteria(100)	Burkholderiales(100)	unclassified(61)	unclassified(61)
Otu0541	0	0	0	0	1	0	0	0	0	0	0	0	0	0	unclassified(100)	unclassified(100)	unclassified(100)	unclassified(100)	unclassified(100)
Otu0542	0	1	0	0	1	0	0	0	0	0	0	0	1	0	Actinobacteria(100)	Actinobacteria(100)	Actinomycetales(100)	Pseudonocardiaceae(100)	Amycolatopsis(100)
Otu0543	0	0	0	0	0	0	0	0	0	0	5	0	0	0	Proteobacteria(100)	unclassified(100)	unclassified(100)	unclassified(100)	unclassified(100)
Otu0544	0	0	0	0	0	0	0	0	0	0	1	0	1	0	Proteobacteria(100)	Alphaproteobacteria(100)	Rhizobiales(100)	Hyphomicrobiaceae(100)	Devosia(100)
Otu0545	0	0	0	0	0	0	0	4	0	0	0	0	0	0	Proteobacteria(100)	Betaproteobacteria(100)	Burkholderiales(100)	Oxalobacteraceae(100)	unclassified(100)
Otu0546	0	0	0	0	0	0	0	0	0	0	0	0	0	2	unclassified(100)	unclassified(100)	unclassified(100)	unclassified(100)	unclassified(100)
Otu0547	0	0	0	4	0	0	0	0	0	0	0	0	0	0	Bacteroidetes(100)	Sphingobacteria(100)	Sphingobacteriales(100)	Chitinophagaceae(100)	unclassified(100)
Otu0548	0	0	0	0	0	0	0	0	0	0	0	2	0	0	Actinobacteria(100)	Actinobacteria(100)	Actinomycetales(100)	Pseudonocardiaceae(100)	Lentzea(100)
Otu0549	0	0	0	3	0	0	0	0	0	0	0	0	0	0	Proteobacteria(100)	Betaproteobacteria(100)	unclassified(100)	unclassified(100)	unclassified(100)
Otu0550	0	0	0	0	0	0	0	0	0	0	0	4	0	0	Proteobacteria(100)	Gammaproteobacteria(100)	Xanthomonadales(100)	Xanthomonadaceae(100)	unclassified(100)
Otu0551	0	0	0	0	0	0	0	0	0	0	0	4	0	0	Proteobacteria(100)	unclassified(100)	unclassified(100)	unclassified(100)	unclassified(100)
Otu0552	0	0	0	0	0	0	0	0	1	0	0	0	3	0	Proteobacteria(100)	Alphaproteobacteria(100)	Rhizobiales(100)	Phyllobacteriaceae(100)	unclassified(100)
Otu0553	0	0	0	1	2	0	0	0	0	0	0	0	0	0	Actinobacteria(100)	Actinobacteria(100)	Solirubrobacterales(80)	unclassified(61)	unclassified(61)
Otu0554	0	0	0	0	0	0	0	0	0	0	0	0	0	4	Proteobacteria(100)	unclassified(100)	unclassified(100)	unclassified(100)	unclassified(100)
Otu0555	0	0	0	5	0	0	0	0	0	0	0	0	0	0	unclassified(100)	unclassified(100)	unclassified(100)	unclassified(100)	unclassified(100)
Otu0556	3	0	0	0	0	0	0	0	0	0	0	0	0	0	unclassified(100)	unclassified(100)	unclassified(100)	unclassified(100)	unclassified(100)
Otu0557	4	0	0	0	0	0	0	0	0	0	0	0	0	0	unclassified(100)	unclassified(100)	unclassified(100)	unclassified(100)	unclassified(100)
Otu0558	0	0	0	0	0	0	0	0	0	0	0	0	0	4	Proteobacteria(100)	Deltaproteobacteria(100)	Myxococcales(100)	Cystobacteraceae(80)	unclassified(80)
Otu0559	0	1	0	1	0	0	0	0	0	0	0	0	0	0	Proteobacteria(100)	Alphaproteobacteria(100)	Rhodospirillales(100)	Acetobacteraceae(100)	unclassified(100)
Otu0560	5	0	0	0	0	0	0	0	0	0	0	0	0	0	unclassified(100)	unclassified(100)	unclassified(100)	unclassified(100)	unclassified(100)
Otu0561	5	0	0	0	0	0	0	0	0	0	0	0	0	0	Proteobacteria(100)	Alphaproteobacteria(100)	unclassified(100)	unclassified(100)	unclassified(100)
Otu0562	0	3	0	0	0	0	0	0	0	0	0	0	0	0	Proteobacteria(100)	Alphaproteobacteria(100)	unclassified(100)	unclassified(100)	unclassified(100)
Otu0563	0	0	0	0	0	0	0	0	0	0	0	0	0	4	unclassified(100)	unclassified(100)	unclassified(100)	unclassified(100)	unclassified(100)
Otu0564	0	2	0	0	0	0	0	0	0	0	0	0	0	0	Proteobacteria(100)	Alphaproteobacteria(100)	unclassified(100)	unclassified(100)	unclassified(100)
Otu0565	0	3	0	0	0	0	0	0	0	0	0	0	0	0	unclassified(100)	unclassified(100)	unclassified(100)	unclassified(100)	unclassified(100)
Otu0566	0	0	0	0	0	0	0	0	0	0	0	1	0	0	Proteobacteria(100)	Alphaproteobacteria(100)	unclassified(100)	unclassified(100)	unclassified(100)
Otu0567	0	0	0	0	0	0	0	0	0	0	0	0	5	0	unclassified(100)	unclassified(100)	unclassified(100)	unclassified(100)	unclassified(100)
Otu0568	0	0	0	0	0	0	0	0	0	0	5	0	0	0	Bacteroidetes(100)	Sphingobacteria(100)	Sphingobacteriales(100)	Chitinophagaceae(100)	unclassified(100)
Otu0569	0	0	4	0	0	0	0	0	0	0	0	0	0	0	unclassified(100)	unclassified(100)	unclassified(100)	unclassified(100)	unclassified(100)
Otu0571	0	3	0	0	0	0	0	0	0	0	0	0	0	0	Firmicutes(100)	Bacilli(100)	Bacillales(100)	unclassified(100)	unclassified(100)
Otu0572	0	0	0	0	0	0	0	0	0	0	0	0	0	2	Proteobacteria(100)	Alphaproteobacteria(100)	Rhizobiales(100)	Hyphomicrobiaceae(100)	Devosia(100)
Otu0573	0	0	4	0	0	0	0	0	0	0	0	0	0	0	unclassified(100)	unclassified(100)	unclassified(100)	unclassified(100)	unclassified(100)
Otu0574	0	0	0	0	0	0	0	0	0	0	0	0	4	0	Proteobacteria(100)	Alphaproteobacteria(100)	Rhizobiales(100)	Rhizobiaceae(100)	Rhizobium(100)
Otu0575	0	0	2	0	0	0	0	0	0	0	0	0	0	3	Proteobacteria(100)	Alphaproteobacteria(100)	Rhodospirillales(100)	unclassified(100)	unclassified(100)
Otu0576	0	0	0	0	0	0	0	0	0	2	0	0	0	0	Proteobacteria(100)	Deltaproteobacteria(100)	Myxococcales(100)	Polyangiaceae(100)	unclassified(100)
Otu0577	0	0	4	1	0	0	0	0	0	0	0	0	0	0	Proteobacteria(100)	Betaproteobacteria(100)	unclassified(100)	unclassified(100)	unclassified(100)
Otu0578	0	0	0	0	0	0	0	0	0	0	0	1	0	2	Proteobacteria(100)	Alphaproteobacteria(100)	Rhizobiales(100)	Rhizobiaceae(100)	Rhizobium(100)
Otu0579	0	0	0	0	0	0	0	0	0	0	0	2	0	0	unclassified(100)	unclassified(100)	unclassified(100)	unclassified(100)	unclassified(100)
Otu0580	0	3	0	0	0	0	0	0	0	0	0	0	0	0	Firmicutes(100)	Bacilli(100)	Bacillales(100)	unclassified(100)	unclassified(100)
Otu0581	0	0	0	0	0	5	0	0	0	0	0	0	0	0	Proteobacteria(100)	unclassified(100)	unclassified(100)	unclassified(100)	unclassified(100)
Otu0582	0	0	0	0	0	0	0	0	0	2	0	0	0	0	unclassified(100)	unclassified(100)	unclassified(100)	unclassified(100)	unclassified(100)
Otu0583	0	0	3	0	0	0	0	0	0	0	0	0	0	0	unclassified(100)	unclassified(100)	unclassified(100)	unclassified(100)	unclassified(100)
Otu0584	0	3	0	0	0	0	0	0	0	0	0	0	0	0	unclassified(100)	unclassified(100)	unclassified(100)	unclassified(100)	unclassified(100)
Otu0585	4	0	0	0	0	0	0	0	0	0	0	0	0	0	unclassified(100)	unclassified(100)	unclassified(100)	unclassified(100)	unclassified(100)
Otu0586	0	0	0	0	0	5	0	0	0	0	0	0	0	0	Proteobacteria(100)	Betaproteobacteria(100)	Burkholderiales(100)	unclassified(100)	unclassified(100)
Otu0587	5	0	0	0	0	0	0	0	0	0	0	0	0	0	unclassified(100)	unclassified(100)	unclassified(100)	unclassified(100)	unclassified(100)
Otu0588	0	2	0	0	0	0	0	0	0	0	0	0	0	0	Bacteroidetes(100)	Sphingobacteria(100)	Sphingobacteriales(100)	Chitinophagaceae(100)	unclassified(100)
Otu0589	0	2	0	0	0	0	0	0	0	0	0	0	0	0	unclassified(100)	unclassified(100)	unclassified(100)	unclassified(100)	unclassified(100)
Otu0590	4	0	0	0	0	0	0	0	0	0	0	0	0	0	Proteobacteria(100)	Betaproteobacteria(100)	Burkholderiales(100)	unclassified(100)	unclassified(100)
Otu0591	0	0	4	0	0	0	0	0	0	0	0	0	0	0	unclassified(100)	unclassified(100)	unclassified(100)	unclassified(100)	unclassified(100)
Otu0593	0	0	0	0	0	0	0	0	0	0	0	3	0	0	Proteobacteria(100)	Gammaproteobacteria(100)	unclassified(100)	unclassified(100)	unclassified(100)
Otu0594	0	0	0	1	0	0	0	0	4	0	0	0	0	0	Proteobacteria(100)	Betaproteobacteria(100)	Burkholderiales(100)	Alcaligenaceae(100)	Azohydromonas(100)
Otu0596	0	0	1	0	1	0	0	0	0	0	0	0	0	0	Proteobacteria(100)	Alphaproteobacteria(100)	Rhizobiales(100)	Methylobacteriaceae(100)	Microvirga(100)
Otu0597	0	0	0	0	0	0	0	0	5	0	0	0	0	0	unclassified(100)	unclassified(100)	unclassified(100)	unclassified(100)	unclassified(100)
Otu0598	0	0	0	0	0	0	4	0	0	0	0	0	0	0	unclassified(100)	unclassified(100)	unclassified(100)	unclassified(100)	unclassified(100)
Otu0599	0	0	0	0	0	0	0	0	0	0	5	0	0	0	Proteobacteria(100)	Gammaproteobacteria(100)	Xanthomonadales(100)	Xanthomonadaceae(100)	unclassified(100)
Otu0600	0	0	0	0	0	0	3	0	0	0	0	0	0	0	Proteobacteria(100)	Alphaproteobacteria(100)	unclassified(100)	unclassified(100)	unclassified(100)
Otu0601	0	0	0	0	0	0	0	0	0	0	0	0	0	5	unclassified(100)	unclassified(100)	unclassified(100)	unclassified(100)	unclassified(100)
Otu0602	0	0	0	0	0	0	0	0	0	0	0	0	0	4	Proteobacteria(100)	Betaproteobacteria(100)	Burkholderiales(100)	Oxalobacteraceae(100)	Telluria(100)
Otu0603	0	0	0	0	0	0	2	0	0	0	0	0	0	0	Proteobacteria(100)	Alphaproteobacteria(100)	unclassified(100)	unclassified(100)	unclassified(100)
Otu0604	0	0	0	0	0	0	0	0	0	0	0	2	0	0	unclassified(100)	unclassified(100)	unclassified(100)	unclassified(100)	unclassified(100)
Otu0605	0	0	0	0	0	0	0	0	0	0	0	0	0	5	Proteobacteria(100)	unclassified(100)	unclassified(100)	unclassified(100)	unclassified(100)
Otu0606	0	0	0	0	0	0	0	0	0	0	5	0	0	0	Proteobacteria(100)	Alphaproteobacteria(100)	unclassified(100)	unclassified(100)	unclassified(100)
Otu0607	0	0	0	0	0	2	0	0	0	0	2	0	0	0	Proteobacteria(100)	Alphaproteobacteria(100)	Rhizobiales(100)	Hyphomicrobiaceae(100)	Devosia(100)
Otu0608	0	0	0	0	0	0	2	0	0	0	0	0	0	0	unclassified(100)	unclassified(100)	unclassified(100)	unclassified(100)	unclassified(100)
Otu0609	0	0	0	0	0	0	0	0	3	0	0	0	0	0	Proteobacteria(100)	unclassified(100)	unclassified(100)	unclassified(100)	unclassified(100)
Otu0610	0	1	0	0	0	2	0	0	0	0	0	0	0	0	Proteobacteria(100)	Deltaproteobacteria(100)	Myxococcales(100)	Cystobacteraceae(100)	unclassified(61)
Otu0611	0	0	0	0	0	0	0	0	0	0	0	1	3	0	Proteobacteria(100)	Betaproteobacteria(100)	Burkholderiales(100)	Burkholderiales_incertae_sedis(100)	unclassified(100)
Otu0612	0	0	0	5	0	0	0	0	0	0	0	0	0	0	Proteobacteria(100)	Alphaproteobacteria(100)	Sphingomonadales(100)	Sphingomonadaceae(100)	unclassified(100)
Otu0613	0	0	0	0	0	0	5	0	0	0	0	0	0	0	unclassified(100)	unclassified(100)	unclassified(100)	unclassified(100)	unclassified(100)
Otu0615	0	0	1	0	0	0	0	0	0	0	0	0	0	0	Proteobacteria(100)	Alphaproteobacteria(100)	Rhizobiales(100)	unclassified(100)	unclassified(100)
Otu0616	0	0	0	0	0	0	0	0	0	0	5	0	0	0	Firmicutes(100)	Bacilli(100)	Bacillales(100)	Bacillaceae_1(100)	Bacillus(100)
Otu0617	0	0	0	0	1	0	0	0	0	0	0	0	0	0	Firmicutes(100)	unclassified(100)	unclassified(100)	unclassified(100)	unclassified(100)
Otu0618	0	0	0	2	0	0	0	0	0	0	0	0	0	0	Proteobacteria(100)	Alphaproteobacteria(100)	Rhizobiales(100)	Bradyrhizobiaceae(100)	unclassified(100)
Otu0619	0	0	0	0	0	0	1	0	0	0	0	0	0	0	unclassified(100)	unclassified(100)	unclassified(100)	unclassified(100)	unclassified(100)
Otu0620	2	0	0	2	0	0	0	0	0	0	0	0	0	0	Actinobacteria(100)	Actinobacteria(100)	Solirubrobacterales(100)	unclassified(100)	unclassified(100)
Otu0621	0	0	0	1	0	0	0	0	0	1	0	0	0	0	unclassified(100)	unclassified(100)	unclassified(100)	unclassified(100)	unclassified(100)
Otu0622	0	0	0	0	3	0	0	0	0	0	0	0	0	0	unclassified(100)	unclassified(100)	unclassified(100)	unclassified(100)	unclassified(100)
Otu0623	0	0	0	0	2	0	0	0	0	0	0	0	0	0	Actinobacteria(100)	Actinobacteria(100)	Actinomycetales(100)	unclassified(100)	unclassified(100)
Otu0624	0	0	0	0	0	0	0	3	0	0	0	0	0	0	Proteobacteria(100)	Gammaproteobacteria(100)	unclassified(100)	unclassified(100)	unclassified(100)
Otu0625	0	0	0	0	2	0	0	0	0	0	0	0	0	0	unclassified(100)	unclassified(100)	unclassified(100)	unclassified(100)	unclassified(100)
Otu0626	0	0	0	0	2	0	0	0	0	0	0	0	0	0	Proteobacteria(100)	Alphaproteobacteria(100)	unclassified(100)	unclassified(100)	unclassified(100)
Otu0627	0	0	0	0	2	0	0	0	0	0	0	0	0	0	unclassified(100)	unclassified(100)	unclassified(100)	unclassified(100)	unclassified(100)
Otu0628	0	0	0	0	2	0	0	0	0	0	0	0	0	0	unclassified(100)	unclassified(100)	unclassified(100)	unclassified(100)	unclassified(100)
Otu0629	0	0	0	0	0	1	0	0	0	0	3	0	0	0	Bacteroidetes(100)	Sphingobacteria(100)	Sphingobacteriales(100)	Chitinophagaceae(100)	unclassified(100)
Otu0630	0	2	0	0	0	0	0	0	0	0	0	0	0	0	Acidobacteria(100)	Acidobacteria_Gp3(100)	unclassified(100)	unclassified(100)	unclassified(100)
Otu0631	0	0	0	0	2	0	0	0	0	0	0	0	0	0	unclassified(100)	unclassified(100)	unclassified(100)	unclassified(100)	unclassified(100)
Otu0632	0	0	0	2	0	0	0	0	0	0	0	0	0	0	Proteobacteria(100)	Alphaproteobacteria(100)	unclassified(100)	unclassified(100)	unclassified(100)
Otu0633	4	0	0	0	0	0	0	0	0	0	0	0	0	0	unclassified(100)	unclassified(100)	unclassified(100)	unclassified(100)	unclassified(100)
Otu0634	0	0	0	1	0	0	0	0	0	0	0	0	0	0	Acidobacteria(100)	Acidobacteria_Gp1(100)	Acidobacteria_Gp1_order_incertae_sedis(100)	Acidobacteria_Gp1_family_incertae_sedis(100)	Gp1(100)
Otu0635	2	0	0	0	0	0	0	0	0	0	0	0	0	0	Proteobacteria(100)	Alphaproteobacteria(100)	Rhodospirillales(100)	Acetobacteraceae(100)	Rhodopila(100)
Otu0636	4	0	0	0	0	0	0	0	0	0	0	0	0	0	Proteobacteria(100)	Betaproteobacteria(100)	unclassified(100)	unclassified(100)	unclassified(100)
Otu0637	0	0	0	0	0	0	0	0	0	0	0	3	0	0	Proteobacteria(100)	Gammaproteobacteria(100)	Xanthomonadales(100)	unclassified(100)	unclassified(100)
Otu0638	0	0	0	0	0	0	0	0	4	0	0	0	0	0	Verrucomicrobia(100)	Subdivision3(100)	Subdivision3_order_incertae_sedis(100)	Subdivision3_family_incertae_sedis(100)	3_genus_incertae_sedis(100)
Otu0639	4	0	0	0	0	0	0	0	0	0	0	0	0	0	unclassified(100)	unclassified(100)	unclassified(100)	unclassified(100)	unclassified(100)
Otu0640	4	0	0	0	0	0	0	0	0	0	0	0	0	0	Proteobacteria(100)	Gammaproteobacteria(100)	Xanthomonadales(100)	Xanthomonadaceae(100)	unclassified(100)
Otu0641	4	0	0	0	0	0	0	0	0	0	0	0	0	0	Proteobacteria(100)	Alphaproteobacteria(100)	Rhizobiales(100)	unclassified(100)	unclassified(100)
Otu0642	4	0	0	0	0	0	0	0	0	0	0	0	0	0	unclassified(100)	unclassified(100)	unclassified(100)	unclassified(100)	unclassified(100)
Otu0643	0	0	1	0	2	0	0	0	1	0	0	0	0	0	unclassified(100)	unclassified(100)	unclassified(100)	unclassified(100)	unclassified(100)
Otu0644	3	0	0	0	0	0	0	0	0	0	0	0	0	0	Proteobacteria(100)	Alphaproteobacteria(100)	Sphingomonadales(100)	Sphingomonadaceae(100)	unclassified(100)
Otu0645	0	0	0	0	0	0	0	0	0	0	0	2	0	0	unclassified(100)	unclassified(100)	unclassified(100)	unclassified(100)	unclassified(100)
Otu0646	0	0	0	0	0	4	0	0	0	0	0	0	0	0	unclassified(100)	unclassified(100)	unclassified(100)	unclassified(100)	unclassified(100)
Otu0647	0	1	0	3	0	0	0	0	0	0	0	0	0	0	unclassified(100)	unclassified(100)	unclassified(100)	unclassified(100)	unclassified(100)
Otu0648	0	0	0	0	0	0	0	0	0	0	0	3	0	0	unclassified(100)	unclassified(100)	unclassified(100)	unclassified(100)	unclassified(100)
Otu0649	0	2	0	0	0	0	1	0	0	0	0	0	0	0	Proteobacteria(100)	Betaproteobacteria(100)	unclassified(100)	unclassified(100)	unclassified(100)
Otu0650	0	0	0	0	0	0	0	0	0	0	0	2	0	0	Proteobacteria(100)	Alphaproteobacteria(100)	Rhizobiales(100)	unclassified(100)	unclassified(100)
Otu0651	0	0	0	0	0	0	0	0	0	0	0	2	0	0	Proteobacteria(100)	Alphaproteobacteria(100)	unclassified(100)	unclassified(100)	unclassified(100)
Otu0652	0	0	0	0	0	0	1	0	0	0	0	1	1	0	Proteobacteria(100)	Betaproteobacteria(100)	Burkholderiales(100)	unclassified(100)	unclassified(100)
Otu0653	0	0	0	1	0	0	0	0	0	0	0	2	0	0	Acidobacteria(100)	Acidobacteria_Gp10(100)	Acidobacteria_Gp10_order_incertae_sedis(100)	Acidobacteria_Gp10_family_incertae_sedis(100)	Gp10(100)
Otu0654	0	1	0	0	0	0	1	0	0	0	0	0	0	0	unclassified(100)	unclassified(100)	unclassified(100)	unclassified(100)	unclassified(100)
Otu0655	3	0	1	0	0	0	0	0	0	0	0	0	0	0	Acidobacteria(100)	Acidobacteria_Gp1(100)	Acidobacteria_Gp1_order_incertae_sedis(100)	Acidobacteria_Gp1_family_incertae_sedis(100)	Gp1(100)
Otu0656	0	0	0	0	1	0	1	0	0	0	0	0	1	0	Acidobacteria(100)	Acidobacteria_Gp1(100)	Acidobacteria_Gp1_order_incertae_sedis(100)	Acidobacteria_Gp1_family_incertae_sedis(100)	Gp1(100)
Otu0657	0	0	0	4	0	0	0	0	0	0	0	0	0	0	Actinobacteria(100)	Actinobacteria(100)	Actinomycetales(100)	Nocardioidaceae(100)	Nocardioides(100)
Otu0658	0	0	3	0	0	0	0	0	0	0	0	0	0	0	unclassified(100)	unclassified(100)	unclassified(100)	unclassified(100)	unclassified(100)
Otu0659	0	1	1	0	0	0	0	0	0	0	0	0	0	0	unclassified(100)	unclassified(100)	unclassified(100)	unclassified(100)	unclassified(100)
Otu0660	2	0	0	2	0	0	0	0	0	0	0	0	0	0	unclassified(100)	unclassified(100)	unclassified(100)	unclassified(100)	unclassified(100)
Otu0661	0	0	0	4	0	0	0	0	0	0	0	0	0	0	Proteobacteria(100)	Alphaproteobacteria(100)	Rhodospirillales(100)	Rhodospirillaceae(100)	Skermanella(100)
Otu0662	0	0	0	4	0	0	0	0	0	0	0	0	0	0	Proteobacteria(100)	unclassified(100)	unclassified(100)	unclassified(100)	unclassified(100)
Otu0663	0	0	0	0	0	0	0	0	3	0	0	1	0	0	Proteobacteria(100)	Alphaproteobacteria(100)	Caulobacterales(100)	Caulobacteraceae(100)	unclassified(100)
Otu0664	0	2	0	0	0	0	0	0	0	0	0	0	0	0	Proteobacteria(100)	unclassified(100)	unclassified(100)	unclassified(100)	unclassified(100)
Otu0666	0	0	0	0	0	0	0	0	0	0	0	0	4	0	Proteobacteria(100)	Betaproteobacteria(100)	Burkholderiales(100)	unclassified(100)	unclassified(100)
Otu0667	0	0	0	0	0	0	0	3	0	0	0	0	0	0	Proteobacteria(100)	unclassified(100)	unclassified(100)	unclassified(100)	unclassified(100)
Otu0668	0	0	0	0	0	0	0	0	0	0	0	0	0	4	Deinococcus-Thermus(100)	Deinococci(100)	Deinococcales(100)	Deinococcaceae(100)	unclassified(100)
Otu0669	0	0	0	0	0	0	0	0	0	0	0	0	0	3	Proteobacteria(100)	Betaproteobacteria(100)	Methylophilales(100)	Methylophilaceae(100)	Methylophilus(100)
Otu0670	2	0	0	0	0	0	0	1	1	0	0	0	0	0	unclassified(100)	unclassified(100)	unclassified(100)	unclassified(100)	unclassified(100)
Otu0671	1	0	0	0	1	0	0	0	0	0	0	0	0	2	Proteobacteria(100)	Alphaproteobacteria(100)	Rhodospirillales(100)	Acetobacteraceae(100)	Rhodopila(100)
Otu0672	2	0	0	0	0	0	0	0	0	0	0	0	0	0	Proteobacteria(100)	Alphaproteobacteria(100)	unclassified(100)	unclassified(100)	unclassified(100)
Otu0673	0	0	0	0	0	0	0	0	2	0	0	0	2	0	Bacteroidetes(100)	Sphingobacteria(100)	Sphingobacteriales(100)	Chitinophagaceae(100)	unclassified(100)
Otu0674	2	0	0	0	0	0	0	1	0	0	0	0	0	0	unclassified(100)	unclassified(100)	unclassified(100)	unclassified(100)	unclassified(100)
Otu0675	0	0	2	0	0	0	0	0	1	0	0	0	0	0	Firmicutes(100)	Bacilli(100)	Bacillales(100)	Paenibacillaceae_1(100)	unclassified
Otu0676	0	0	3	0	0	0	0	0	0	0	0	0	0	0	unclassified(100)	unclassified(100)	unclassified(100)	unclassified(100)	unclassified(100)
Otu0677	0	0	0	0	0	0	3	0	0	0	0	0	0	0	Proteobacteria(100)	Alphaproteobacteria(100)	unclassified(100)	unclassified(100)	unclassified(100)
Otu0678	0	1	0	0	0	0	0	0	0	0	0	0	0	0	unclassified(100)	unclassified(100)	unclassified(100)	unclassified(100)	unclassified(100)
Otu0679	0	0	0	0	0	0	0	0	0	2	0	0	0	0	Proteobacteria(100)	Gammaproteobacteria(100)	Xanthomonadales(100)	Xanthomonadaceae(100)	unclassified(100)
Otu0680	0	0	0	0	0	0	0	0	3	0	0	0	0	0	Acidobacteria(100)	Acidobacteria_Gp3(100)	Acidobacteria_Gp3_order_incetae_sedis(100)	Acidobacteria_Gp3_family_incetae_sedis(100)	Bryobacter(100)
Otu0681	0	0	0	0	0	0	0	1	0	0	0	0	0	0	Proteobacteria(100)	unclassified(100)	unclassified(100)	unclassified(100)	unclassified(100)
Otu0682	0	0	0	0	0	0	0	0	4	0	0	0	0	0	Proteobacteria(100)	unclassified(100)	unclassified(100)	unclassified(100)	unclassified(100)
Otu0683	0	0	4	0	0	0	0	0	0	0	0	0	0	0	Proteobacteria(100)	Alphaproteobacteria(100)	Rhizobiales(100)	Phyllobacteriaceae(100)	unclassified(75)
Otu0684	0	2	0	0	0	0	0	0	0	0	0	0	0	0	Nitrospira(100)	Nitrospira(100)	Nitrospirales(100)	Nitrospiraceae(100)	Nitrospira(100)
Otu0685	1	0	3	0	0	0	0	0	0	0	0	0	0	0	unclassified(100)	unclassified(100)	unclassified(100)	unclassified(100)	unclassified(100)
Otu0687	0	4	0	0	0	0	0	0	0	0	0	0	0	0	Proteobacteria(100)	Gammaproteobacteria(100)	Xanthomonadales(100)	Xanthomonadaceae(100)	unclassified(100)
Otu0688	0	3	0	0	0	0	0	0	0	0	0	0	0	0	unclassified(100)	unclassified(100)	unclassified(100)	unclassified(100)	unclassified(100)
Otu0689	0	0	4	0	0	0	0	0	0	0	0	0	0	0	Proteobacteria(100)	Alphaproteobacteria(100)	Rhodospirillales(100)	Acetobacteraceae(100)	Acidisphaera(100)
Otu0690	0	1	0	0	0	0	0	0	0	0	0	0	0	0	Bacteroidetes(100)	Sphingobacteria(100)	Sphingobacteriales(100)	Chitinophagaceae(100)	Flavisolibacter(100)
Otu0691	0	0	0	0	0	0	0	0	0	0	0	0	4	0	Proteobacteria(100)	unclassified(100)	unclassified(100)	unclassified(100)	unclassified(100)
Otu0692	0	0	4	0	0	0	0	0	0	0	0	0	0	0	unclassified(100)	unclassified(100)	unclassified(100)	unclassified(100)	unclassified(100)
Otu0693	0	0	4	0	0	0	0	0	0	0	0	0	0	0	unclassified(100)	unclassified(100)	unclassified(100)	unclassified(100)	unclassified(100)
Otu0694	0	0	0	0	0	0	1	0	0	0	0	0	0	0	Proteobacteria(100)	Gammaproteobacteria(100)	Xanthomonadales(100)	Xanthomonadaceae(100)	unclassified(100)
Otu0695	0	0	0	0	0	0	0	0	0	1	0	0	0	0	Proteobacteria(100)	Betaproteobacteria(100)	unclassified(100)	unclassified(100)	unclassified(100)
Otu0696	0	0	2	0	0	0	0	0	0	0	0	0	0	0	Proteobacteria(100)	Gammaproteobacteria(100)	Xanthomonadales(100)	Xanthomonadaceae(100)	unclassified(100)
Otu0697	0	0	0	0	0	0	1	0	3	0	0	0	0	0	Proteobacteria(100)	Alphaproteobacteria(75)	Rhizobiales(75)	Brucellaceae(75)	unclassified(75)
Otu0698	0	0	4	0	0	0	0	0	0	0	0	0	0	0	Deinococcus-Thermus(100)	Deinococci(100)	Deinococcales(100)	Deinococcaceae(100)	unclassified(100)
Otu0699	0	0	0	0	0	0	0	0	0	0	0	0	4	0	Proteobacteria(100)	Alphaproteobacteria(100)	unclassified(100)	unclassified(100)	unclassified(100)
Otu0700	0	0	3	0	0	0	0	0	0	0	0	0	0	0	Proteobacteria(100)	Gammaproteobacteria(100)	Xanthomonadales(100)	Xanthomonadaceae(100)	unclassified(100)
Otu0702	0	0	0	0	0	0	1	0	0	0	0	0	0	0	Verrucomicrobia(100)	Subdivision3(100)	Subdivision3_order_incertae_sedis(100)	Subdivision3_family_incertae_sedis(100)	3_genus_incertae_sedis(100)
Otu0703	0	0	0	0	0	0	0	0	0	0	4	0	0	0	Proteobacteria(100)	Alphaproteobacteria(100)	unclassified(100)	unclassified(100)	unclassified(100)
Otu0704	0	0	0	0	0	0	4	0	0	0	0	0	0	0	unclassified(100)	unclassified(100)	unclassified(100)	unclassified(100)	unclassified(100)
Otu0705	0	0	0	0	0	0	0	0	0	0	4	0	0	0	Proteobacteria(100)	unclassified(100)	unclassified(100)	unclassified(100)	unclassified(100)
Otu0706	0	0	0	0	0	0	2	0	0	0	0	0	0	0	Proteobacteria(100)	unclassified(100)	unclassified(100)	unclassified(100)	unclassified(100)
Otu0707	0	0	0	0	0	0	0	4	0	0	0	0	0	0	Proteobacteria(100)	Gammaproteobacteria(100)	Xanthomonadales(100)	Xanthomonadaceae(100)	unclassified(100)
Otu0709	0	0	0	0	0	0	0	0	0	1	0	0	0	0	Proteobacteria(100)	Gammaproteobacteria(100)	Xanthomonadales(100)	Xanthomonadaceae(100)	unclassified(100)
Otu0710	0	0	0	0	0	0	0	0	4	0	0	0	0	0	Proteobacteria(100)	unclassified(100)	unclassified(100)	unclassified(100)	unclassified(100)
Otu0711	0	0	1	2	0	0	0	0	0	0	0	0	0	0	unclassified(100)	unclassified(100)	unclassified(100)	unclassified(100)	unclassified(100)
Otu0712	2	0	0	0	2	0	0	0	0	0	0	0	0	0	unclassified(100)	unclassified(100)	unclassified(100)	unclassified(100)	unclassified(100)
Otu0714	1	0	0	0	0	0	0	0	0	0	0	0	0	0	unclassified(100)	unclassified(100)	unclassified(100)	unclassified(100)	unclassified(100)
Otu0716	0	0	0	0	3	0	0	0	0	0	0	0	0	0	unclassified(100)	unclassified(100)	unclassified(100)	unclassified(100)	unclassified(100)
Otu0717	0	0	0	0	0	0	3	0	0	0	0	0	0	0	Proteobacteria(100)	Alphaproteobacteria(100)	Rhizobiales(100)	unclassified(100)	unclassified(100)
Otu0718	0	0	0	0	0	0	0	0	0	0	0	3	0	0	Proteobacteria(100)	unclassified(100)	unclassified(100)	unclassified(100)	unclassified(100)
Otu0719	0	0	0	0	0	0	0	0	4	0	0	0	0	0	Proteobacteria(100)	unclassified(100)	unclassified(100)	unclassified(100)	unclassified(100)
Otu0720	0	3	0	0	0	0	0	0	0	0	0	0	0	0	unclassified(100)	unclassified(100)	unclassified(100)	unclassified(100)	unclassified(100)
Otu0721	1	0	0	3	0	0	0	0	0	0	0	0	0	0	Firmicutes(100)	Bacilli(100)	Bacillales(100)	Alicyclobacillaceae(100)	unclassified(100)
Otu0722	0	0	0	0	0	0	0	1	0	0	0	0	0	0	Proteobacteria(100)	Betaproteobacteria(100)	unclassified(100)	unclassified(100)	unclassified(100)
Otu0723	0	0	0	0	0	0	0	1	0	0	0	0	0	0	Proteobacteria(100)	Alphaproteobacteria(100)	unclassified(100)	unclassified(100)	unclassified(100)
Otu0725	0	0	3	0	0	0	0	0	0	0	0	0	0	0	unclassified(100)	unclassified(100)	unclassified(100)	unclassified(100)	unclassified(100)
Otu0726	0	0	0	0	0	0	0	0	0	0	1	0	0	1	Actinobacteria(100)	Actinobacteria(100)	Actinomycetales(100)	Streptosporangiaceae(100)	Nonomuraea(100)
Otu0727	0	1	0	0	0	0	0	0	0	0	0	0	0	0	unclassified(100)	unclassified(100)	unclassified(100)	unclassified(100)	unclassified(100)
Otu0728	0	0	0	0	2	0	0	0	0	0	0	0	0	0	Proteobacteria(100)	Betaproteobacteria(100)	Burkholderiales(100)	Alcaligenaceae(100)	unclassified(100)
Otu0729	0	0	0	0	0	0	0	0	0	4	0	0	0	0	unclassified(75)	unclassified(75)	unclassified(75)	unclassified(75)	unclassified(75)
Otu0730	1	0	0	1	0	0	0	0	0	1	0	0	0	0	unclassified(100)	unclassified(100)	unclassified(100)	unclassified(100)	unclassified(100)
Otu0731	0	0	0	0	0	0	0	0	0	0	0	0	2	0	Proteobacteria(100)	Alphaproteobacteria(100)	Caulobacterales(100)	Caulobacteraceae(100)	Asticcacaulis(100)
Otu0732	0	1	0	0	0	0	0	0	0	0	0	0	0	0	unclassified(100)	unclassified(100)	unclassified(100)	unclassified(100)	unclassified(100)
Otu0733	0	0	0	0	0	0	0	0	0	0	4	0	0	0	unclassified(100)	unclassified(100)	unclassified(100)	unclassified(100)	unclassified(100)
Otu0734	0	1	0	0	0	0	0	0	0	0	0	0	0	0	Firmicutes(100)	Bacilli(100)	unclassified(100)	unclassified(100)	unclassified(100)
Otu0735	0	0	0	0	2	0	0	0	0	0	0	0	0	0	Proteobacteria(100)	Betaproteobacteria(100)	unclassified(100)	unclassified(100)	unclassified(100)
Otu0736	0	0	4	0	0	0	0	0	0	0	0	0	0	0	unclassified(100)	unclassified(100)	unclassified(100)	unclassified(100)	unclassified(100)
Otu0737	0	0	0	0	0	0	0	3	0	0	0	0	0	0	Proteobacteria(100)	unclassified(100)	unclassified(100)	unclassified(100)	unclassified(100)
Otu0738	0	0	0	0	0	0	0	0	4	0	0	0	0	0	Proteobacteria(100)	Alphaproteobacteria(100)	Rhizobiales(100)	unclassified(100)	unclassified(100)
Otu0739	0	0	0	0	0	0	0	2	0	0	0	0	0	0	unclassified(100)	unclassified(100)	unclassified(100)	unclassified(100)	unclassified(100)
Otu0740	0	2	0	0	0	0	0	0	0	0	0	0	0	0	Proteobacteria(100)	Alphaproteobacteria(100)	unclassified(100)	unclassified(100)	unclassified(100)
Otu0741	0	0	0	2	2	0	0	0	0	0	0	0	0	0	Bacteroidetes(100)	Sphingobacteria(100)	Sphingobacteriales(100)	unclassified(100)	unclassified(100)
Otu0742	0	0	4	0	0	0	0	0	0	0	0	0	0	0	unclassified(100)	unclassified(100)	unclassified(100)	unclassified(100)	unclassified(100)
Otu0743	0	0	0	0	0	0	0	3	0	0	0	0	0	0	Proteobacteria(100)	Gammaproteobacteria(100)	unclassified(100)	unclassified(100)	unclassified(100)
Otu0744	0	0	0	0	0	0	0	0	0	0	0	0	4	0	Proteobacteria(100)	Betaproteobacteria(100)	Burkholderiales(100)	unclassified(100)	unclassified(100)
Otu0745	0	0	0	0	0	0	0	0	4	0	0	0	0	0	unclassified(100)	unclassified(100)	unclassified(100)	unclassified(100)	unclassified(100)
Otu0747	0	0	0	0	0	0	0	0	0	1	0	0	0	0	Proteobacteria(100)	Deltaproteobacteria(100)	Myxococcales(100)	Polyangiaceae(100)	unclassified(100)
Otu0748	0	1	0	0	0	0	0	0	0	0	0	0	0	0	Proteobacteria(100)	Alphaproteobacteria(100)	unclassified(100)	unclassified(100)	unclassified(100)
Otu0749	0	1	0	0	0	0	0	0	0	0	0	0	0	0	Acidobacteria(100)	Acidobacteria_Gp3(100)	Acidobacteria_Gp3_order_incertae_sedis(100)	Acidobacteria_Gp3_family_incertae_sedis(100)	Gp3(100)
Otu0750	0	0	0	0	0	0	0	0	0	0	0	0	4	0	Proteobacteria(100)	Alphaproteobacteria(100)	Rhizobiales(100)	unclassified(100)	unclassified(100)
Otu0751	0	0	0	0	2	0	0	0	0	0	0	0	0	0	Acidobacteria(100)	Acidobacteria_Gp5(100)	Acidobacteria_Gp5_order_incertae_sedis(100)	Acidobacteria_Gp5_family_incertae_sedis(100)	Gp5(100)
Otu0752	0	0	1	0	0	0	1	0	1	0	0	0	0	0	Armatimonadetes(100)	Armatimonadetes_gp5_class_incertae_sedis(100)	Armatimonadetes_gp5_order_incetae_sedis(100)	Armatimonadetes_gp5_family_incetae_sedis(100)	Armatimonadetes_gp5(100)
Otu0753	0	0	0	0	0	0	0	3	0	0	0	0	0	0	Proteobacteria(100)	unclassified(100)	unclassified(100)	unclassified(100)	unclassified(100)
Otu0754	0	2	0	0	0	0	1	0	0	0	0	0	0	0	Acidobacteria(100)	Acidobacteria_Gp3(100)	Acidobacteria_Gp3_order_incetae_sedis(100)	Acidobacteria_Gp3_family_incetae_sedis(100)	Bryobacter(100)
Otu0755	0	0	3	0	0	0	0	0	0	0	0	0	0	0	Proteobacteria(100)	Alphaproteobacteria(100)	Rhizobiales(100)	unclassified(100)	unclassified(100)
Otu0756	0	0	3	0	0	0	0	0	0	0	0	0	0	0	Proteobacteria(100)	unclassified(100)	unclassified(100)	unclassified(100)	unclassified(100)
Otu0757	0	0	0	0	1	0	0	0	0	0	0	0	1	0	Actinobacteria(100)	Actinobacteria(100)	Actinomycetales(100)	Micromonosporaceae(100)	unclassified(67)
Otu0758	0	0	2	0	0	0	0	0	0	0	0	0	0	0	Proteobacteria(100)	Betaproteobacteria(100)	unclassified(100)	unclassified(100)	unclassified(100)
Otu0759	0	0	1	0	0	0	1	0	0	0	0	0	0	0	Acidobacteria(100)	Acidobacteria_Gp3(100)	unclassified(67)	unclassified(67)	unclassified(67)
Otu0760	0	0	0	0	0	0	0	2	0	0	0	0	0	0	unclassified(100)	unclassified(100)	unclassified(100)	unclassified(100)	unclassified(100)
Otu0761	0	0	0	0	0	0	0	1	0	0	0	0	0	0	Proteobacteria(100)	Betaproteobacteria(100)	unclassified(100)	unclassified(100)	unclassified(100)
Otu0762	0	0	0	0	0	0	2	0	0	0	0	0	0	0	Proteobacteria(100)	Deltaproteobacteria(100)	Myxococcales(100)	Polyangiaceae(100)	unclassified(100)
Otu0763	0	0	0	0	0	0	0	0	0	0	0	1	0	0	Proteobacteria(100)	unclassified(100)	unclassified(100)	unclassified(100)	unclassified(100)
Otu0764	0	0	0	0	0	0	0	0	0	0	3	0	0	0	Proteobacteria(100)	Alphaproteobacteria(100)	Sphingomonadales(100)	Sphingomonadaceae(100)	Sphingomonas(100)
Otu0765	0	0	0	0	0	0	0	0	0	0	0	1	0	0	unclassified(100)	unclassified(100)	unclassified(100)	unclassified(100)	unclassified(100)
Otu0766	0	0	0	1	0	0	0	0	0	0	0	0	0	0	Proteobacteria(100)	unclassified(100)	unclassified(100)	unclassified(100)	unclassified(100)
Otu0767	2	0	0	0	0	0	0	0	0	0	0	0	1	0	unclassified(100)	unclassified(100)	unclassified(100)	unclassified(100)	unclassified(100)
Otu0768	0	0	1	0	0	0	0	1	0	0	0	0	0	0	Bacteroidetes(100)	Sphingobacteria(100)	Sphingobacteriales(100)	Chitinophagaceae(100)	unclassified(100)
Otu0769	0	0	0	0	0	0	0	0	0	0	0	1	0	0	Proteobacteria(100)	unclassified(100)	unclassified(100)	unclassified(100)	unclassified(100)
Otu0770	0	0	0	0	0	0	0	0	0	0	0	1	0	0	Proteobacteria(100)	unclassified(100)	unclassified(100)	unclassified(100)	unclassified(100)
Otu0771	0	0	0	0	0	0	0	0	0	0	0	1	0	0	unclassified(100)	unclassified(100)	unclassified(100)	unclassified(100)	unclassified(100)
Otu0772	0	0	0	0	1	0	0	0	0	0	0	0	0	0	unclassified(100)	unclassified(100)	unclassified(100)	unclassified(100)	unclassified(100)
Otu0773	0	0	0	0	0	0	0	2	0	0	0	0	0	0	Proteobacteria(100)	Alphaproteobacteria(100)	Rhodospirillales(100)	Acetobacteraceae(100)	unclassified(100)
Otu0774	0	0	2	0	0	0	0	0	0	0	0	0	0	0	unclassified(100)	unclassified(100)	unclassified(100)	unclassified(100)	unclassified(100)
Otu0775	0	0	0	0	0	0	0	0	0	0	0	1	0	0	Proteobacteria(100)	unclassified(100)	unclassified(100)	unclassified(100)	unclassified(100)
Otu0776	0	0	0	0	0	0	0	2	0	0	0	0	0	0	Proteobacteria(100)	Betaproteobacteria(100)	unclassified(100)	unclassified(100)	unclassified(100)
Otu0777	0	0	0	0	0	0	0	0	0	0	0	0	3	0	Proteobacteria(100)	Betaproteobacteria(100)	Burkholderiales(100)	unclassified(100)	unclassified(100)
Otu0778	0	0	0	0	0	0	0	2	0	0	0	0	0	0	Proteobacteria(100)	Gammaproteobacteria(100)	Xanthomonadales(100)	Xanthomonadaceae(100)	unclassified(100)
Otu0779	0	0	1	0	0	0	0	0	0	0	0	0	0	0	Actinobacteria(100)	Actinobacteria(100)	Solirubrobacterales(100)	Solirubrobacteraceae(67)	Solirubrobacter(67)
Otu0780	0	0	0	0	0	0	0	2	0	0	0	0	0	0	Proteobacteria(100)	Betaproteobacteria(100)	Burkholderiales(100)	Comamonadaceae(100)	unclassified(100)
Otu0781	0	0	0	0	0	0	0	0	0	0	0	1	0	0	unclassified(100)	unclassified(100)	unclassified(100)	unclassified(100)	unclassified(100)
Otu0782	0	1	0	0	0	0	0	0	0	0	0	0	0	0	Proteobacteria(100)	unclassified(100)	unclassified(100)	unclassified(100)	unclassified(100)
Otu0783	0	0	3	0	0	0	0	0	0	0	0	0	0	0	Proteobacteria(100)	unclassified(100)	unclassified(100)	unclassified(100)	unclassified(100)
Otu0784	0	0	0	0	1	0	1	0	0	0	0	0	0	0	unclassified(100)	unclassified(100)	unclassified(100)	unclassified(100)	unclassified(100)
Otu0785	0	0	0	0	0	0	0	0	0	0	0	1	0	0	Proteobacteria(100)	unclassified(100)	unclassified(100)	unclassified(100)	unclassified(100)
Otu0786	0	0	3	0	0	0	0	0	0	0	0	0	0	0	unclassified(100)	unclassified(100)	unclassified(100)	unclassified(100)	unclassified(100)
Otu0787	0	0	0	0	1	0	0	0	0	0	0	0	0	0	Proteobacteria(100)	Betaproteobacteria(100)	Burkholderiales(100)	unclassified(100)	unclassified(100)
Otu0788	0	0	3	0	0	0	0	0	0	0	0	0	0	0	Proteobacteria(100)	Betaproteobacteria(100)	Burkholderiales(100)	Comamonadaceae(100)	unclassified(100)
Otu0789	0	2	1	0	0	0	0	0	0	0	0	0	0	0	unclassified(100)	unclassified(100)	unclassified(100)	unclassified(100)	unclassified(100)
Otu0790	0	0	0	0	2	0	0	0	0	0	0	0	0	0	unclassified(100)	unclassified(100)	unclassified(100)	unclassified(100)	unclassified(100)
Otu0791	0	0	3	0	0	0	0	0	0	0	0	0	0	0	Firmicutes(100)	Clostridia(100)	Clostridiales(100)	Lachnospiraceae(100)	unclassified(100)
Otu0792	0	0	0	0	0	0	0	0	0	0	3	0	0	0	Proteobacteria(100)	unclassified(100)	unclassified(100)	unclassified(100)	unclassified(100)
Otu0793	0	0	0	0	0	0	0	0	0	0	0	1	0	0	Proteobacteria(100)	Betaproteobacteria(100)	Burkholderiales(100)	unclassified(100)	unclassified(100)
Otu0794	0	0	2	0	0	0	0	0	0	0	0	0	0	0	unclassified(100)	unclassified(100)	unclassified(100)	unclassified(100)	unclassified(100)
Otu0795	0	0	1	0	0	0	0	0	0	0	0	0	0	0	unclassified(100)	unclassified(100)	unclassified(100)	unclassified(100)	unclassified(100)
Otu0796	0	0	3	0	0	0	0	0	0	0	0	0	0	0	Proteobacteria(100)	Betaproteobacteria(100)	unclassified(100)	unclassified(100)	unclassified(100)
Otu0797	0	0	0	0	0	0	0	0	0	0	3	0	0	0	unclassified(100)	unclassified(100)	unclassified(100)	unclassified(100)	unclassified(100)
Otu0798	0	0	0	0	1	0	0	0	0	0	0	0	0	0	unclassified(100)	unclassified(100)	unclassified(100)	unclassified(100)	unclassified(100)
Otu0799	0	0	0	0	0	0	0	0	0	0	0	1	0	0	Proteobacteria(100)	Alphaproteobacteria(100)	Rhizobiales(100)	Bradyrhizobiaceae(100)	unclassified(100)
Otu0801	0	0	0	0	0	0	0	0	0	0	0	1	0	0	Proteobacteria(100)	Alphaproteobacteria(100)	Rhizobiales(100)	Aurantimonadaceae(100)	Aurantimonas(100)
Otu0803	0	0	0	0	0	0	0	1	0	0	0	0	0	0	unclassified(100)	unclassified(100)	unclassified(100)	unclassified(100)	unclassified(100)
Otu0804	0	0	0	0	0	0	0	2	0	0	0	0	0	0	Proteobacteria(100)	Betaproteobacteria(100)	Burkholderiales(100)	unclassified(100)	unclassified(100)
Otu0805	0	0	1	0	0	0	0	0	0	0	2	0	0	0	Proteobacteria(100)	Alphaproteobacteria(100)	Rhizobiales(100)	Hyphomicrobiaceae(100)	Filomicrobium(67)
Otu0806	0	0	0	0	0	0	0	1	0	0	0	0	0	0	Proteobacteria(100)	unclassified(100)	unclassified(100)	unclassified(100)	unclassified(100)
Otu0807	0	0	3	0	0	0	0	0	0	0	0	0	0	0	Proteobacteria(100)	Alphaproteobacteria(100)	unclassified(100)	unclassified(100)	unclassified(100)
Otu0808	0	0	0	0	0	0	0	1	0	0	0	0	0	0	Proteobacteria(100)	Alphaproteobacteria(100)	unclassified(100)	unclassified(100)	unclassified(100)
Otu0809	0	1	0	0	1	0	0	0	0	0	0	0	0	0	unclassified(100)	unclassified(100)	unclassified(100)	unclassified(100)	unclassified(100)
Otu0810	0	0	0	0	0	0	0	0	0	0	0	2	0	0	Proteobacteria(100)	Gammaproteobacteria(100)	Xanthomonadales(100)	Xanthomonadaceae(100)	unclassified(100)
Otu0811	0	0	3	0	0	0	0	0	0	0	0	0	0	0	unclassified(100)	unclassified(100)	unclassified(100)	unclassified(100)	unclassified(100)
Otu0812	0	0	2	0	0	0	0	0	0	0	0	0	0	0	Proteobacteria(100)	unclassified(100)	unclassified(100)	unclassified(100)	unclassified(100)
Otu0813	0	0	0	0	0	0	0	0	0	0	3	0	0	0	unclassified(100)	unclassified(100)	unclassified(100)	unclassified(100)	unclassified(100)
Otu0814	0	0	2	0	0	0	0	0	0	0	0	0	0	0	Proteobacteria(100)	Deltaproteobacteria(100)	Myxococcales(100)	Cystobacteraceae(100)	Anaeromyxobacter(100)
Otu0815	0	1	0	1	0	0	1	0	0	0	0	0	0	0	unclassified(100)	unclassified(100)	unclassified(100)	unclassified(100)	unclassified(100)
Otu0817	0	0	3	0	0	0	0	0	0	0	0	0	0	0	unclassified(100)	unclassified(100)	unclassified(100)	unclassified(100)	unclassified(100)
Otu0818	0	0	0	0	0	0	0	0	0	0	0	0	1	0	Proteobacteria(100)	Betaproteobacteria(100)	Burkholderiales(100)	unclassified(100)	unclassified(100)
Otu0819	1	0	0	0	0	0	0	0	0	0	2	0	0	0	unclassified(100)	unclassified(100)	unclassified(100)	unclassified(100)	unclassified(100)
Otu0820	0	0	0	0	0	0	0	1	0	0	0	0	0	0	Proteobacteria(100)	Betaproteobacteria(100)	unclassified(100)	unclassified(100)	unclassified(100)
Otu0822	0	0	0	0	0	0	0	0	0	0	0	1	0	0	Proteobacteria(100)	Betaproteobacteria(100)	Burkholderiales(100)	Comamonadaceae(100)	unclassified(100)
Otu0824	0	0	3	0	0	0	0	0	0	0	0	0	0	0	Proteobacteria(100)	unclassified(100)	unclassified(100)	unclassified(100)	unclassified(100)
Otu0825	0	0	3	0	0	0	0	0	0	0	0	0	0	0	Proteobacteria(100)	Alphaproteobacteria(100)	Rhizobiales(100)	unclassified(100)	unclassified(100)
Otu0826	0	0	3	0	0	0	0	0	0	0	0	0	0	0	Proteobacteria(100)	Gammaproteobacteria(100)	Xanthomonadales(100)	Xanthomonadaceae(100)	unclassified(100)
Otu0827	0	0	2	0	0	0	0	0	0	0	0	0	0	0	Proteobacteria(100)	Alphaproteobacteria(100)	unclassified(100)	unclassified(100)	unclassified(100)
Otu0828	0	0	1	0	0	0	0	0	0	0	0	0	0	0	unclassified(100)	unclassified(100)	unclassified(100)	unclassified(100)	unclassified(100)
Otu0829	0	0	0	0	1	0	0	0	0	0	0	0	0	0	unclassified(100)	unclassified(100)	unclassified(100)	unclassified(100)	unclassified(100)
Otu0830	0	0	0	0	0	0	1	0	0	0	0	0	0	0	unclassified(100)	unclassified(100)	unclassified(100)	unclassified(100)	unclassified(100)
Otu0831	0	0	3	0	0	0	0	0	0	0	0	0	0	0	Proteobacteria(100)	Alphaproteobacteria(100)	Rhizobiales(100)	unclassified(100)	unclassified(100)
Otu0832	0	0	3	0	0	0	0	0	0	0	0	0	0	0	unclassified(100)	unclassified(100)	unclassified(100)	unclassified(100)	unclassified(100)
Otu0833	0	0	3	0	0	0	0	0	0	0	0	0	0	0	Proteobacteria(100)	unclassified(100)	unclassified(100)	unclassified(100)	unclassified(100)
Otu0834	0	0	3	0	0	0	0	0	0	0	0	0	0	0	Deinococcus-Thermus(100)	Deinococci(100)	Deinococcales(100)	Deinococcaceae(100)	unclassified(100)
Otu0835	0	0	0	0	0	0	0	2	0	0	0	0	0	0	Proteobacteria(100)	Betaproteobacteria(100)	Burkholderiales(100)	unclassified(100)	unclassified(100)
Otu0836	0	0	3	0	0	0	0	0	0	0	0	0	0	0	Proteobacteria(100)	Alphaproteobacteria(100)	Rhizobiales(100)	unclassified(100)	unclassified(100)
Otu0837	0	0	0	0	0	0	1	0	0	0	0	0	0	0	Firmicutes(100)	Bacilli(100)	Bacillales(100)	unclassified(100)	unclassified(100)
Otu0838	0	0	0	0	0	3	0	0	0	0	0	0	0	0	Proteobacteria(100)	Alphaproteobacteria(100)	Rhizobiales(100)	unclassified(100)	unclassified(100)
Otu0839	0	0	0	0	0	0	0	0	0	2	0	0	0	0	Actinobacteria(100)	Actinobacteria(100)	unclassified(100)	unclassified(100)	unclassified(100)
Otu0840	0	1	0	0	0	0	0	0	0	0	0	1	0	0	unclassified(100)	unclassified(100)	unclassified(100)	unclassified(100)	unclassified(100)
Otu0841	0	0	0	0	2	0	0	0	0	0	0	0	0	0	Firmicutes(100)	Bacilli(100)	Bacillales(100)	Paenibacillaceae_1(100)	unclassified(100)
Otu0842	0	0	0	0	0	0	3	0	0	0	0	0	0	0	Proteobacteria(100)	Alphaproteobacteria(100)	Sphingomonadales(100)	Sphingomonadaceae(100)	unclassified(100)
Otu0843	0	0	0	0	0	0	0	0	0	2	0	0	0	0	Bacteroidetes(100)	Sphingobacteria(100)	Sphingobacteriales(100)	Chitinophagaceae(100)	unclassified(100)
Otu0844	0	0	0	0	1	0	0	0	0	0	0	0	0	0	Actinobacteria(100)	Actinobacteria(100)	unclassified(100)	unclassified(100)	unclassified(100)
Otu0845	0	3	0	0	0	0	0	0	0	0	0	0	0	0	Proteobacteria(100)	Alphaproteobacteria(100)	Rhodospirillales(100)	Acetobacteraceae(100)	unclassified(100)
Otu0846	0	0	0	0	0	0	0	0	0	2	0	0	0	0	Proteobacteria(100)	Betaproteobacteria(100)	Burkholderiales(100)	unclassified(100)	unclassified(100)
Otu0847	0	0	0	0	0	0	0	0	0	2	0	0	0	0	unclassified(100)	unclassified(100)	unclassified(100)	unclassified(100)	unclassified(100)
Otu0849	0	0	0	0	0	3	0	0	0	0	0	0	0	0	Acidobacteria(100)	Acidobacteria_Gp1(100)	Acidobacteria_Gp1_order_incertae_sedis(100)	Acidobacteria_Gp1_family_incertae_sedis(100)	Gp1(100)
Otu0850	0	0	0	0	0	0	0	0	0	0	0	0	0	3	Proteobacteria(100)	Gammaproteobacteria(100)	Xanthomonadales(100)	Xanthomonadaceae(100)	unclassified(100)
Otu0851	0	0	0	0	0	0	2	0	0	0	0	0	0	0	Actinobacteria(100)	Actinobacteria(100)	unclassified(100)	unclassified(100)	unclassified(100)
Otu0852	0	0	0	0	0	0	3	0	0	0	0	0	0	0	Proteobacteria(100)	unclassified(100)	unclassified(100)	unclassified(100)	unclassified(100)
Otu0853	0	0	0	0	0	0	0	2	0	0	0	0	0	0	Proteobacteria(100)	Gammaproteobacteria(100)	Xanthomonadales(100)	Xanthomonadaceae(100)	unclassified(100)
Otu0854	0	0	0	0	0	0	2	0	0	0	0	0	0	0	Bacteroidetes(100)	Sphingobacteria(100)	Sphingobacteriales(100)	Chitinophagaceae(100)	unclassified(100)
Otu0855	0	0	0	0	0	0	0	0	0	0	0	0	0	3	Acidobacteria(100)	Acidobacteria_Gp1(100)	Acidobacteria_Gp1_order_incertae_sedis(100)	Acidobacteria_Gp1_family_incertae_sedis(100)	Gp1(100)
Otu0856	0	0	0	0	0	0	0	0	0	0	0	0	0	3	Bacteroidetes(100)	Sphingobacteria(100)	Sphingobacteriales(100)	Chitinophagaceae(100)	Parasegetibacter(100)
Otu0857	0	0	0	0	0	0	0	0	0	1	0	0	0	0	Proteobacteria(100)	unclassified(100)	unclassified(100)	unclassified(100)	unclassified(100)
Otu0858	0	0	0	0	0	0	0	0	0	0	0	0	0	3	Proteobacteria(100)	Gammaproteobacteria(100)	Xanthomonadales(100)	Xanthomonadaceae(100)	unclassified(100)
Otu0860	0	1	0	0	0	0	0	0	0	0	0	0	0	0	Proteobacteria(100)	Alphaproteobacteria(100)	unclassified(100)	unclassified(100)	unclassified(100)
Otu0861	0	0	0	1	0	0	0	0	0	0	0	0	0	0	unclassified(100)	unclassified(100)	unclassified(100)	unclassified(100)	unclassified(100)
Otu0862	0	0	0	3	0	0	0	0	0	0	0	0	0	0	Proteobacteria(100)	Alphaproteobacteria(100)	Rhizobiales(100)	Aurantimonadaceae(100)	Aurantimonas(100)
Otu0863	2	0	0	0	0	1	0	0	0	0	0	0	0	0	Actinobacteria(100)	Actinobacteria(100)	Actinomycetales(100)	Pseudonocardiaceae(100)	Pseudonocardia(100)
Otu0864	0	0	0	0	0	0	2	0	0	0	0	0	0	0	Acidobacteria(100)	Acidobacteria_Gp3(100)	Acidobacteria_Gp3_order_incertae_sedis(100)	Acidobacteria_Gp3_family_incertae_sedis(100)	Gp3(100)
Otu0865	0	0	0	0	0	1	0	0	0	0	0	1	1	0	Proteobacteria(100)	Alphaproteobacteria(100)	Sphingomonadales(100)	Sphingomonadaceae(100)	Sphingosinicella(67)
Otu0866	3	0	0	0	0	0	0	0	0	0	0	0	0	0	Proteobacteria(100)	Gammaproteobacteria(100)	unclassified(100)	unclassified(100)	unclassified(100)
Otu0867	0	0	0	0	0	0	1	0	0	0	0	0	0	0	Proteobacteria(100)	unclassified(100)	unclassified(100)	unclassified(100)	unclassified(100)
Otu0868	1	0	0	0	0	0	0	0	0	0	0	0	0	0	Proteobacteria(100)	Alphaproteobacteria(100)	Sphingomonadales(100)	unclassified(100)	unclassified(100)
Otu0871	0	0	0	0	0	0	0	0	0	1	0	1	0	0	Proteobacteria(100)	Alphaproteobacteria(100)	Rhizobiales(100)	Phyllobacteriaceae(100)	Phyllobacterium(100)
Otu0872	0	0	0	0	0	0	2	0	0	0	0	0	0	0	Firmicutes(100)	Bacilli(100)	Bacillales(100)	Paenibacillaceae_1(100)	Paenibacillus(100)
Otu0874	0	0	0	0	0	0	3	0	0	0	0	0	0	0	unclassified(100)	unclassified(100)	unclassified(100)	unclassified(100)	unclassified(100)
Otu0875	0	0	0	0	0	0	2	0	0	0	0	0	0	0	Proteobacteria(100)	Gammaproteobacteria(100)	Xanthomonadales(100)	Xanthomonadaceae(100)	unclassified(100)
Otu0876	0	0	0	0	0	0	2	0	0	0	0	0	0	0	Proteobacteria(100)	unclassified(100)	unclassified(100)	unclassified(100)	unclassified(100)
Otu0877	0	0	0	0	0	2	0	0	0	0	0	0	0	0	Proteobacteria(100)	Betaproteobacteria(100)	unclassified(100)	unclassified(100)	unclassified(100)
Otu0878	0	0	0	0	0	0	1	0	0	0	0	0	0	0	Proteobacteria(100)	Betaproteobacteria(100)	Burkholderiales(100)	unclassified(100)	unclassified(100)
Otu0879	0	0	0	0	0	0	2	0	0	0	0	0	0	0	Proteobacteria(100)	Betaproteobacteria(100)	Burkholderiales(100)	unclassified(100)	unclassified(100)
Otu0880	0	0	0	0	0	0	1	0	0	0	0	0	0	0	unclassified(100)	unclassified(100)	unclassified(100)	unclassified(100)	unclassified(100)
Otu0881	0	0	0	0	1	0	0	0	0	0	0	0	0	0	unclassified(100)	unclassified(100)	unclassified(100)	unclassified(100)	unclassified(100)
Otu0882	0	0	0	3	0	0	0	0	0	0	0	0	0	0	Proteobacteria(100)	Gammaproteobacteria(100)	unclassified(100)	unclassified(100)	unclassified(100)
Otu0883	0	0	0	0	0	0	2	0	0	0	0	0	0	0	Proteobacteria(100)	unclassified(100)	unclassified(100)	unclassified(100)	unclassified(100)
Otu0884	0	0	0	0	0	3	0	0	0	0	0	0	0	0	Proteobacteria(100)	Betaproteobacteria(100)	Burkholderiales(100)	Comamonadaceae(100)	unclassified(100)
Otu0885	0	0	0	0	0	0	0	0	0	0	0	0	0	3	Actinobacteria(100)	Actinobacteria(100)	Actinomycetales(100)	Streptomycetaceae(100)	Streptomyces(100)
Otu0886	2	0	0	0	0	0	0	0	0	0	0	0	0	0	unclassified(100)	unclassified(100)	unclassified(100)	unclassified(100)	unclassified(100)
Otu0887	2	0	0	0	0	0	0	0	0	0	0	0	0	0	unclassified(100)	unclassified(100)	unclassified(100)	unclassified(100)	unclassified(100)
Otu0888	0	0	0	0	0	0	0	0	0	0	1	0	1	1	Proteobacteria(100)	Betaproteobacteria(100)	Burkholderiales(100)	unclassified(67)	unclassified(67)
Otu0889	0	0	0	0	0	0	2	0	0	0	0	0	0	0	Firmicutes(100)	Bacilli(100)	Bacillales(100)	Paenibacillaceae_1(100)	Paenibacillus(100)
Otu0890	0	0	0	0	0	0	0	1	0	0	0	0	0	0	Proteobacteria(100)	Betaproteobacteria(100)	unclassified(100)	unclassified(100)	unclassified(100)
Otu0891	0	0	0	0	0	0	0	0	0	1	0	0	0	0	Proteobacteria(100)	unclassified(100)	unclassified(100)	unclassified(100)	unclassified(100)
Otu0892	0	0	0	0	1	0	0	0	0	0	0	0	0	0	unclassified(100)	unclassified(100)	unclassified(100)	unclassified(100)	unclassified(100)
Otu0893	0	0	0	0	3	0	0	0	0	0	0	0	0	0	Proteobacteria(100)	Alphaproteobacteria(100)	unclassified(100)	unclassified(100)	unclassified(100)
Otu0894	0	0	0	0	3	0	0	0	0	0	0	0	0	0	Proteobacteria(100)	Alphaproteobacteria(100)	unclassified(100)	unclassified(100)	unclassified(100)
Otu0895	1	0	0	0	0	0	0	0	0	0	0	0	0	0	unclassified(100)	unclassified(100)	unclassified(100)	unclassified(100)	unclassified(100)
Otu0896	0	0	0	0	0	0	0	0	0	0	0	0	0	3	Proteobacteria(100)	Alphaproteobacteria(100)	Caulobacterales(100)	Caulobacteraceae(100)	Phenylobacterium(100)
Otu0897	0	0	0	0	0	0	0	0	0	2	0	0	0	0	unclassified(100)	unclassified(100)	unclassified(100)	unclassified(100)	unclassified(100)
Otu0898	0	0	0	0	0	0	0	0	3	0	0	0	0	0	unclassified(100)	unclassified(100)	unclassified(100)	unclassified(100)	unclassified(100)
Otu0899	0	0	0	2	0	0	0	0	0	0	0	0	0	0	Actinobacteria(100)	Actinobacteria(100)	Actinomycetales(100)	Geodermatophilaceae(100)	Modestobacter(100)
Otu0900	0	0	0	0	0	0	0	0	0	2	0	0	0	0	Proteobacteria(100)	Alphaproteobacteria(100)	Sphingomonadales(100)	Sphingomonadaceae(100)	Novosphingobium(100)
Otu0902	0	0	0	0	0	2	0	0	0	0	0	0	0	1	Firmicutes(100)	Bacilli(100)	Bacillales(100)	unclassified(67)	unclassified(67)
Otu0903	0	0	0	0	0	0	0	0	0	1	0	0	0	0	unclassified(100)	unclassified(100)	unclassified(100)	unclassified(100)	unclassified(100)
Otu0904	0	0	0	0	0	0	0	0	0	1	0	0	0	0	Proteobacteria(100)	Gammaproteobacteria(100)	unclassified(100)	unclassified(100)	unclassified(100)
Otu0905	0	0	0	0	0	0	0	0	0	1	0	0	0	0	unclassified(100)	unclassified(100)	unclassified(100)	unclassified(100)	unclassified(100)
Otu0906	0	0	0	0	0	0	0	0	0	0	0	1	0	0	unclassified(100)	unclassified(100)	unclassified(100)	unclassified(100)	unclassified(100)
Otu0907	0	2	0	0	0	0	0	0	0	0	0	0	0	0	Proteobacteria(100)	unclassified(100)	unclassified(100)	unclassified(100)	unclassified(100)
Otu0908	0	0	0	0	0	0	0	0	0	1	0	0	1	1	Bacteroidetes(100)	Sphingobacteria(100)	Sphingobacteriales(100)	unclassified(100)	unclassified(100)
Otu0909	0	3	0	0	0	0	0	0	0	0	0	0	0	0	unclassified(100)	unclassified(100)	unclassified(100)	unclassified(100)	unclassified(100)
Otu0910	0	2	0	0	0	0	0	0	0	0	0	0	0	0	Proteobacteria(100)	Betaproteobacteria(100)	Burkholderiales(100)	unclassified(100)	unclassified(100)
Otu0911	0	2	0	0	0	0	0	0	0	0	0	0	0	0	Proteobacteria(100)	Betaproteobacteria(100)	unclassified(100)	unclassified(100)	unclassified(100)
Otu0912	0	1	0	0	0	0	0	0	0	0	0	0	0	0	unclassified(100)	unclassified(100)	unclassified(100)	unclassified(100)	unclassified(100)
Otu0913	0	3	0	0	0	0	0	0	0	0	0	0	0	0	unclassified(100)	unclassified(100)	unclassified(100)	unclassified(100)	unclassified(100)
Otu0914	0	0	0	0	0	0	0	0	0	0	0	0	0	3	Bacteroidetes(100)	Sphingobacteria(100)	Sphingobacteriales(100)	Chitinophagaceae(100)	unclassified(100)
Otu0915	0	0	0	0	0	0	0	0	0	0	0	0	0	1	unclassified(100)	unclassified(100)	unclassified(100)	unclassified(100)	unclassified(100)
Otu0916	0	3	0	0	0	0	0	0	0	0	0	0	0	0	Proteobacteria(100)	Alphaproteobacteria(100)	Rhodospirillales(100)	unclassified(100)	unclassified(100)
Otu0917	0	3	0	0	0	0	0	0	0	0	0	0	0	0	Actinobacteria(100)	Actinobacteria(100)	Solirubrobacterales(100)	Solirubrobacteraceae(100)	Solirubrobacter(100)
Otu0918	0	0	0	0	0	0	0	0	0	1	0	0	0	0	Proteobacteria(100)	Betaproteobacteria(100)	Burkholderiales(100)	unclassified(100)	unclassified(100)
Otu0919	0	3	0	0	0	0	0	0	0	0	0	0	0	0	unclassified(100)	unclassified(100)	unclassified(100)	unclassified(100)	unclassified(100)
Otu0920	0	2	0	0	0	0	0	0	0	0	0	0	0	0	Acidobacteria(100)	Acidobacteria_Gp1(100)	Acidobacteria_Gp1_order_incertae_sedis(100)	Acidobacteria_Gp1_family_incertae_sedis(100)	Gp1(100)
Otu0921	0	2	0	0	0	0	0	0	0	0	0	0	0	0	unclassified(100)	unclassified(100)	unclassified(100)	unclassified(100)	unclassified(100)
Otu0922	0	1	0	0	0	0	0	0	0	0	0	0	0	0	Bacteroidetes(100)	Sphingobacteria(100)	Sphingobacteriales(100)	Chitinophagaceae(100)	unclassified(100)
Otu0923	0	3	0	0	0	0	0	0	0	0	0	0	0	0	unclassified(100)	unclassified(100)	unclassified(100)	unclassified(100)	unclassified(100)
Otu0924	0	1	0	0	0	0	0	0	0	0	0	0	0	0	Proteobacteria(100)	Alphaproteobacteria(100)	unclassified(100)	unclassified(100)	unclassified(100)
Otu0925	0	0	0	0	2	0	0	0	0	0	0	0	0	0	Proteobacteria(100)	Betaproteobacteria(100)	Burkholderiales(100)	Burkholderiales_incertae_sedis(100)	unclassified(100)
Otu0927	0	0	0	0	0	0	0	0	0	0	0	0	0	2	Proteobacteria(100)	Betaproteobacteria(100)	unclassified(100)	unclassified(100)	unclassified(100)
Otu0928	0	0	0	0	2	0	0	0	0	0	0	0	0	0	Proteobacteria(100)	Alphaproteobacteria(100)	Rhizobiales(100)	Methylobacteriaceae(100)	Microvirga(100)
Otu0929	0	0	0	0	0	0	0	0	3	0	0	0	0	0	Proteobacteria(100)	Betaproteobacteria(100)	Burkholderiales(100)	Burkholderiales_incertae_sedis(100)	unclassified(100)
Otu0930	2	0	0	0	0	0	0	0	0	0	0	0	0	0	Acidobacteria(100)	Acidobacteria_Gp3(100)	unclassified(100)	unclassified(100)	unclassified(100)
Otu0931	3	0	0	0	0	0	0	0	0	0	0	0	0	0	Actinobacteria(100)	Actinobacteria(100)	unclassified(100)	unclassified(100)	unclassified(100)
Otu0932	2	0	0	0	0	0	0	0	0	0	0	0	0	0	unclassified(100)	unclassified(100)	unclassified(100)	unclassified(100)	unclassified(100)
Otu0933	0	0	0	0	0	0	0	0	0	0	0	0	3	0	Proteobacteria(100)	Alphaproteobacteria(100)	Rhizobiales(100)	Bradyrhizobiaceae(100)	unclassified(100)
Otu0934	0	0	0	0	0	2	0	0	0	0	0	0	0	0	unclassified(100)	unclassified(100)	unclassified(100)	unclassified(100)	unclassified(100)
Otu0935	3	0	0	0	0	0	0	0	0	0	0	0	0	0	unclassified(100)	unclassified(100)	unclassified(100)	unclassified(100)	unclassified(100)
Otu0936	3	0	0	0	0	0	0	0	0	0	0	0	0	0	Proteobacteria(100)	unclassified(100)	unclassified(100)	unclassified(100)	unclassified(100)
Otu0937	3	0	0	0	0	0	0	0	0	0	0	0	0	0	unclassified(100)	unclassified(100)	unclassified(100)	unclassified(100)	unclassified(100)
Otu0938	3	0	0	0	0	0	0	0	0	0	0	0	0	0	Proteobacteria(100)	Gammaproteobacteria(100)	Xanthomonadales(100)	Xanthomonadaceae(100)	unclassified(100)
Otu0939	3	0	0	0	0	0	0	0	0	0	0	0	0	0	Proteobacteria(100)	unclassified(100)	unclassified(100)	unclassified(100)	unclassified(100)
Otu0940	0	0	0	0	0	0	0	0	0	0	0	0	3	0	Proteobacteria(100)	Betaproteobacteria(100)	Burkholderiales(100)	unclassified(100)	unclassified(100)
Otu0941	3	0	0	0	0	0	0	0	0	0	0	0	0	0	unclassified(100)	unclassified(100)	unclassified(100)	unclassified(100)	unclassified(100)
Otu0942	2	0	0	0	0	0	0	0	0	0	0	0	0	0	Proteobacteria(100)	Betaproteobacteria(100)	Burkholderiales(100)	unclassified(100)	unclassified(100)
Otu0943	0	0	0	0	0	2	0	0	0	0	0	0	0	0	Proteobacteria(100)	Betaproteobacteria(100)	unclassified(100)	unclassified(100)	unclassified(100)
Otu0944	0	0	0	0	0	0	0	0	3	0	0	0	0	0	Proteobacteria(100)	unclassified(100)	unclassified(100)	unclassified(100)	unclassified(100)
Otu0945	3	0	0	0	0	0	0	0	0	0	0	0	0	0	Proteobacteria(100)	Betaproteobacteria(100)	Burkholderiales(100)	Oxalobacteraceae(100)	unclassified(100)
Otu0946	3	0	0	0	0	0	0	0	0	0	0	0	0	0	unclassified(100)	unclassified(100)	unclassified(100)	unclassified(100)	unclassified(100)
Otu0947	0	0	0	2	0	1	0	0	0	0	0	0	0	0	unclassified(67)	unclassified(67)	unclassified(67)	unclassified(67)	unclassified(67)
Otu0948	3	0	0	0	0	0	0	0	0	0	0	0	0	0	unclassified(100)	unclassified(100)	unclassified(100)	unclassified(100)	unclassified(100)
Otu0949	0	0	0	0	0	0	0	0	3	0	0	0	0	0	unclassified(100)	unclassified(100)	unclassified(100)	unclassified(100)	unclassified(100)
Otu0950	1	1	0	0	0	0	0	0	0	0	0	0	0	0	Proteobacteria(100)	Alphaproteobacteria(100)	Rhodospirillales(100)	Acetobacteraceae(100)	unclassified(67)
Otu0951	3	0	0	0	0	0	0	0	0	0	0	0	0	0	unclassified(100)	unclassified(100)	unclassified(100)	unclassified(100)	unclassified(100)
Otu0952	0	0	0	0	0	0	1	0	1	0	0	0	0	0	Acidobacteria(100)	Acidobacteria_Gp1(100)	Acidobacteria_Gp1_order_incertae_sedis(100)	Acidobacteria_Gp1_family_incertae_sedis(100)	Gp1(100)
Otu0953	0	0	0	0	0	0	0	0	0	0	3	0	0	0	Proteobacteria(100)	Betaproteobacteria(67)	unclassified(67)	unclassified(67)	unclassified(67)
Otu0954	1	0	1	1	0	0	0	0	0	0	0	0	0	0	Actinobacteria(67)	Actinobacteria(67)	unclassified(67)	unclassified(67)	unclassified(67)
Otu0955	0	0	0	1	0	0	0	0	0	0	0	0	0	0	Proteobacteria(100)	Alphaproteobacteria(100)	unclassified(100)	unclassified(100)	unclassified(100)
Otu0956	0	0	0	0	0	0	0	0	0	0	0	0	2	0	Proteobacteria(100)	unclassified(100)	unclassified(100)	unclassified(100)	unclassified(100)
Otu0957	0	0	0	0	2	0	0	0	0	0	0	0	0	0	unclassified(100)	unclassified(100)	unclassified(100)	unclassified(100)	unclassified(100)
Otu0958	0	0	0	0	0	0	0	0	0	0	0	0	0	2	Proteobacteria(100)	Gammaproteobacteria(100)	unclassified(100)	unclassified(100)	unclassified(100)
Otu0959	0	0	0	0	2	0	0	0	0	0	0	0	0	0	Acidobacteria(100)	Acidobacteria_Gp3(100)	Acidobacteria_Gp3_order_incetae_sedis(100)	Acidobacteria_Gp3_family_incetae_sedis(100)	Bryobacter(100)
Otu0960	0	0	0	0	0	0	0	0	1	0	0	0	1	0	Proteobacteria(100)	Betaproteobacteria(100)	Burkholderiales(100)	unclassified(100)	unclassified(100)
Otu0961	0	0	0	0	0	0	0	0	3	0	0	0	0	0	Proteobacteria(100)	Betaproteobacteria(100)	unclassified(100)	unclassified(100)	unclassified(100)
Otu0962	0	0	0	0	0	0	0	0	0	1	0	1	0	0	Proteobacteria(100)	Deltaproteobacteria(67)	unclassified(67)	unclassified(67)	unclassified(67)
Otu0963	0	0	0	3	0	0	0	0	0	0	0	0	0	0	unclassified(100)	unclassified(100)	unclassified(100)	unclassified(100)	unclassified(100)
Otu0964	0	0	0	0	0	0	0	0	3	0	0	0	0	0	Firmicutes(100)	Bacilli(100)	Bacillales(100)	unclassified(100)	unclassified(100)
Otu0965	1	0	0	0	2	0	0	0	0	0	0	0	0	0	Gemmatimonadetes(100)	Gemmatimonadetes(100)	Gemmatimonadales(100)	Gemmatimonadaceae(100)	Gemmatimonas(100)
Otu0966	0	1	0	0	0	0	0	0	0	0	0	0	0	0	Proteobacteria(100)	Deltaproteobacteria(67)	unclassified(67)	unclassified(67)	unclassified(67)
Otu0967	0	0	0	0	2	0	0	0	0	0	0	0	0	0	Firmicutes(100)	Clostridia(100)	Clostridiales(100)	Clostridiaceae_1(100)	Clostridium_sensu_stricto(100)
Otu0968	0	0	0	0	0	0	0	0	3	0	0	0	0	0	unclassified(100)	unclassified(100)	unclassified(100)	unclassified(100)	unclassified(100)
Otu0969	0	0	0	0	0	0	0	0	0	0	0	0	3	0	unclassified(100)	unclassified(100)	unclassified(100)	unclassified(100)	unclassified(100)
Otu0970	0	0	0	0	1	0	0	0	0	0	0	0	0	0	Proteobacteria(100)	Betaproteobacteria(100)	unclassified(100)	unclassified(100)	unclassified(100)
Otu0971	0	0	0	0	0	3	0	0	0	0	0	0	0	0	Proteobacteria(100)	Deltaproteobacteria(100)	Myxococcales(100)	Cystobacteraceae(100)	Archangium(100)
Otu0972	0	0	0	0	1	0	0	0	0	0	0	0	0	0	unclassified(100)	unclassified(100)	unclassified(100)	unclassified(100)	unclassified(100)
Otu0973	0	0	0	0	0	1	0	0	0	0	1	1	0	0	Proteobacteria(100)	Alphaproteobacteria(100)	Sphingomonadales(100)	Erythrobacteraceae(100)	Porphyrobacter(100)
Otu0975	0	0	0	3	0	0	0	0	0	0	0	0	0	0	Proteobacteria(100)	Alphaproteobacteria(100)	Rhizobiales(100)	unclassified(100)	unclassified(100)
Otu0976	0	0	0	0	1	0	0	0	0	0	0	0	0	0	Firmicutes(100)	Bacilli(100)	Bacillales(100)	Bacillaceae_1(67)	unclassified
Otu0977	3	0	0	0	0	0	0	0	0	0	0	0	0	0	Acidobacteria(100)	Acidobacteria_Gp3(100)	unclassified(100)	unclassified(100)	unclassified(100)
Otu0978	0	0	0	0	0	0	0	0	1	0	0	0	0	1	Proteobacteria(100)	Alphaproteobacteria(100)	Rhodospirillales(100)	unclassified(100)	unclassified(100)
Otu0979	0	1	0	0	0	0	0	0	0	0	0	0	0	0	unclassified(100)	unclassified(100)	unclassified(100)	unclassified(100)	unclassified(100)
Otu0980	3	0	0	0	0	0	0	0	0	0	0	0	0	0	Actinobacteria(100)	Actinobacteria(100)	Actinomycetales(100)	unclassified(100)	unclassified(100)
Otu0981	0	0	0	3	0	0	0	0	0	0	0	0	0	0	Actinobacteria(100)	Actinobacteria(100)	Solirubrobacterales(100)	unclassified(100)	unclassified(100)
Otu0982	0	0	0	0	0	2	0	0	0	0	0	0	0	0	Proteobacteria(100)	Gammaproteobacteria(100)	Legionellales(100)	Coxiellaceae(100)	Aquicella(100)
Otu0983	0	1	0	1	0	0	0	0	0	0	0	0	0	0	unclassified(100)	unclassified(100)	unclassified(100)	unclassified(100)	unclassified(100)
Otu0984	0	0	0	0	0	0	0	0	0	0	0	0	0	3	Bacteroidetes(100)	Sphingobacteria(100)	Sphingobacteriales(100)	unclassified(100)	unclassified(100)
Otu0985	0	0	0	0	0	0	0	0	3	0	0	0	0	0	Proteobacteria(100)	Alphaproteobacteria(100)	unclassified(100)	unclassified(100)	unclassified(100)
Otu0986	0	0	0	1	0	0	0	0	0	0	0	0	0	0	Actinobacteria(100)	Actinobacteria(100)	Solirubrobacterales(100)	unclassified(100)	unclassified(100)
Otu0987	0	0	0	3	0	0	0	0	0	0	0	0	0	0	Acidobacteria(100)	Acidobacteria_Gp1(100)	Acidobacteria_Gp1_order_incertae_sedis(100)	Acidobacteria_Gp1_family_incertae_sedis(100)	Gp1(100)
Otu0988	0	0	0	3	0	0	0	0	0	0	0	0	0	0	Proteobacteria(100)	Alphaproteobacteria(100)	unclassified(100)	unclassified(100)	unclassified(100)
Otu0989	0	0	0	0	1	0	0	0	0	0	0	0	0	0	unclassified(100)	unclassified(100)	unclassified(100)	unclassified(100)	unclassified(100)
Otu0990	0	0	0	3	0	0	0	0	0	0	0	0	0	0	Proteobacteria(100)	Alphaproteobacteria(100)	Rhizobiales(100)	Methylobacteriaceae(100)	Methylobacterium(100)
Otu0991	0	0	0	2	0	0	0	0	0	0	0	0	0	0	Verrucomicrobia(100)	Subdivision3(100)	Subdivision3_order_incertae_sedis(100)	Subdivision3_family_incertae_sedis(100)	3_genus_incertae_sedis(100)
Otu0992	0	3	0	0	0	0	0	0	0	0	0	0	0	0	Proteobacteria(100)	Betaproteobacteria(100)	Burkholderiales(100)	Alcaligenaceae(100)	unclassified(100)
Otu0993	0	0	0	0	0	0	0	0	1	0	0	1	0	0	unclassified(100)	unclassified(100)	unclassified(100)	unclassified(100)	unclassified(100)
Otu0994	0	0	0	0	2	0	0	0	0	0	0	0	0	0	Chlamydiae(100)	Chlamydiae(100)	Chlamydiales(100)	unclassified(100)	unclassified(100)
Otu0995	0	0	0	3	0	0	0	0	0	0	0	0	0	0	unclassified(100)	unclassified(100)	unclassified(100)	unclassified(100)	unclassified(100)
Otu0996	0	0	0	2	0	0	0	0	0	0	0	0	0	0	unclassified(100)	unclassified(100)	unclassified(100)	unclassified(100)	unclassified(100)
Otu0997	0	0	0	1	0	0	0	0	0	0	0	0	0	0	Proteobacteria(100)	unclassified(100)	unclassified(100)	unclassified(100)	unclassified(100)
Otu0998	0	0	0	1	0	0	0	0	0	0	0	0	0	0	Proteobacteria(100)	unclassified(100)	unclassified(100)	unclassified(100)	unclassified(100)
Otu0999	0	0	0	0	0	0	0	0	0	0	0	0	3	0	Proteobacteria(100)	Betaproteobacteria(100)	Burkholderiales(100)	Burkholderiaceae(100)	Burkholderia(100)
Otu1000	3	0	0	0	0	0	0	0	0	0	0	0	0	0	Proteobacteria(100)	unclassified(100)	unclassified(100)	unclassified(100)	unclassified(100)
Otu1001	0	0	0	0	0	0	0	0	0	0	0	0	3	0	Proteobacteria(100)	unclassified(100)	unclassified(100)	unclassified(100)	unclassified(100)
Otu1003	0	0	0	0	1	0	0	0	0	0	0	0	0	0	Proteobacteria(100)	Alphaproteobacteria(100)	Sphingomonadales(100)	Sphingomonadaceae(100)	Sphingosinicella(100)
Otu1004	0	0	0	0	0	0	0	0	0	0	0	0	0	3	unclassified(100)	unclassified(100)	unclassified(100)	unclassified(100)	unclassified(100)
Otu1005	1	0	0	0	0	0	0	0	0	0	0	0	0	0	unclassified(100)	unclassified(100)	unclassified(100)	unclassified(100)	unclassified(100)
Otu1006	0	0	0	0	0	0	0	0	0	0	0	0	0	2	unclassified(100)	unclassified(100)	unclassified(100)	unclassified(100)	unclassified(100)
Otu1007	1	1	0	0	1	0	0	0	0	0	0	0	0	0	Actinobacteria(100)	Actinobacteria(100)	Actinomycetales(100)	Micromonosporaceae(100)	unclassified(100)
Otu1008	0	0	0	0	0	0	0	0	0	0	0	0	3	0	Proteobacteria(100)	unclassified(100)	unclassified(100)	unclassified(100)	unclassified(100)
Otu1009	0	0	0	0	0	0	0	0	3	0	0	0	0	0	unclassified(100)	unclassified(100)	unclassified(100)	unclassified(100)	unclassified(100)
Otu1010	0	0	0	2	0	0	0	0	0	0	0	0	0	0	Proteobacteria(100)	Alphaproteobacteria(100)	Rhizobiales(100)	unclassified(100)	unclassified(100)
Otu1011	0	0	0	0	0	0	0	0	0	0	0	0	0	2	Proteobacteria(100)	Alphaproteobacteria(100)	Sphingomonadales(100)	unclassified(100)	unclassified(100)
Otu1012	0	0	0	1	0	0	0	0	0	0	0	0	0	0	Proteobacteria(100)	Alphaproteobacteria(100)	Rhizobiales(100)	unclassified(100)	unclassified(100)
Otu1013	0	0	0	1	0	0	0	0	0	0	0	0	0	0	unclassified(100)	unclassified(100)	unclassified(100)	unclassified(100)	unclassified(100)
Otu1014	0	0	0	0	0	0	0	0	0	0	0	0	0	2	Proteobacteria(100)	Alphaproteobacteria(100)	Rhizobiales(100)	unclassified(100)	unclassified(100)
Otu1015	0	0	0	2	0	0	0	0	0	0	0	0	0	0	Actinobacteria(100)	Actinobacteria(100)	Actinomycetales(100)	Nocardioidaceae(100)	Nocardioides(100)
Otu1016	3	0	0	0	0	0	0	0	0	0	0	0	0	0	Proteobacteria(100)	Alphaproteobacteria(100)	Rhizobiales(100)	unclassified(100)	unclassified(100)
Otu1017	0	0	0	0	0	2	0	0	0	0	0	0	0	0	Proteobacteria(100)	Alphaproteobacteria(100)	Sphingomonadales(100)	unclassified(100)	unclassified(100)
Otu1018	0	0	0	0	0	0	0	0	0	0	0	0	1	0	Proteobacteria(100)	unclassified(100)	unclassified(100)	unclassified(100)	unclassified(100)
Otu1019	0	0	0	2	0	0	0	0	0	0	0	0	0	0	unclassified(100)	unclassified(100)	unclassified(100)	unclassified(100)	unclassified(100)
Otu1020	0	0	0	0	0	2	0	0	0	0	0	0	0	0	Proteobacteria(100)	Betaproteobacteria(100)	Burkholderiales(100)	Oxalobacteraceae(100)	unclassified(100)
Otu1021	0	0	0	0	0	2	0	0	0	0	0	0	0	0	Proteobacteria(100)	unclassified(100)	unclassified(100)	unclassified(100)	unclassified(100)
Otu1022	0	0	0	0	0	2	0	0	0	0	0	0	0	0	Proteobacteria(100)	unclassified(100)	unclassified(100)	unclassified(100)	unclassified(100)
Otu1023	0	0	0	0	0	2	0	0	0	0	0	0	0	0	Bacteroidetes(100)	Sphingobacteria(100)	Sphingobacteriales(100)	Chitinophagaceae(100)	unclassified(100)
Otu1024	0	0	0	0	0	2	0	0	0	0	0	0	0	0	Proteobacteria(100)	unclassified(100)	unclassified(100)	unclassified(100)	unclassified(100)
Otu1025	0	0	0	0	0	1	0	0	0	0	0	0	0	0	Proteobacteria(100)	Betaproteobacteria(100)	Burkholderiales(100)	Oxalobacteraceae(100)	unclassified(100)
Otu1026	0	0	0	0	0	0	0	0	0	0	0	0	2	0	Proteobacteria(100)	Alphaproteobacteria(100)	Rhodospirillales(100)	unclassified(100)	unclassified(100)
Otu1027	0	0	0	0	0	0	0	0	0	0	2	0	0	0	Proteobacteria(100)	Gammaproteobacteria(100)	Xanthomonadales(100)	Xanthomonadaceae(100)	unclassified(100)
Otu1029	0	1	1	0	0	0	0	0	0	0	0	0	0	0	unclassified	unclassified	unclassified	unclassified	unclassified
Otu1030	0	0	0	0	0	0	0	0	0	0	0	0	2	0	Proteobacteria(100)	Alphaproteobacteria(100)	Rhizobiales(100)	Hyphomicrobiaceae(100)	Hyphomicrobium(100)
Otu1031	0	0	0	0	0	0	0	0	0	0	0	0	2	0	Proteobacteria(100)	unclassified(100)	unclassified(100)	unclassified(100)	unclassified(100)
Otu1032	0	0	0	2	0	0	0	0	0	0	0	0	0	0	Proteobacteria(100)	Alphaproteobacteria(100)	unclassified	unclassified	unclassified
Otu1033	0	0	1	0	0	0	0	0	0	0	0	0	0	1	Actinobacteria(100)	Actinobacteria(100)	Actinomycetales(100)	Pseudonocardiaceae(100)	Actinophytocola(100)
Otu1035	0	0	0	1	0	0	0	0	0	0	0	0	0	0	unclassified(100)	unclassified(100)	unclassified(100)	unclassified(100)	unclassified(100)
Otu1036	0	0	0	1	0	0	0	0	0	0	0	0	1	0	Acidobacteria(100)	Acidobacteria_Gp1(100)	Acidobacteria_Gp1_order_incertae_sedis(100)	Acidobacteria_Gp1_family_incertae_sedis(100)	Gp1(100)
Otu1037	0	0	0	1	0	0	0	0	0	0	1	0	0	0	unclassified(100)	unclassified(100)	unclassified(100)	unclassified(100)	unclassified(100)
Otu1038	0	0	0	1	0	0	0	0	0	0	0	0	0	0	unclassified(100)	unclassified(100)	unclassified(100)	unclassified(100)	unclassified(100)
Otu1039	0	0	0	0	0	0	0	0	0	0	0	0	2	0	Proteobacteria(100)	unclassified(100)	unclassified(100)	unclassified(100)	unclassified(100)
Otu1040	0	0	0	0	0	2	0	0	0	0	0	0	0	0	Proteobacteria(100)	Gammaproteobacteria(100)	Xanthomonadales(100)	Xanthomonadaceae(100)	unclassified(100)
Otu1042	0	1	0	0	0	1	0	0	0	0	0	0	0	0	unclassified(100)	unclassified(100)	unclassified(100)	unclassified(100)	unclassified(100)
Otu1043	0	0	1	1	0	0	0	0	0	0	0	0	0	0	Actinobacteria(100)	Actinobacteria(100)	Actinomycetales(100)	Microbacteriaceae(100)	unclassified(100)
Otu1044	0	0	0	0	0	2	0	0	0	0	0	0	0	0	Proteobacteria(100)	Alphaproteobacteria(100)	Sphingomonadales(100)	Sphingomonadaceae(100)	unclassified(100)
Otu1045	0	0	0	0	0	2	0	0	0	0	0	0	0	0	Proteobacteria(100)	Betaproteobacteria(100)	Burkholderiales(100)	Burkholderiales_incertae_sedis(100)	Mitsuaria(100)
Otu1046	0	0	0	0	0	0	0	0	0	0	0	0	2	0	Proteobacteria(100)	Betaproteobacteria(100)	Burkholderiales(100)	unclassified(100)	unclassified(100)
Otu1047	0	0	0	0	0	0	1	0	0	0	0	0	0	0	Proteobacteria(100)	Alphaproteobacteria(100)	unclassified(100)	unclassified(100)	unclassified(100)
Otu1048	0	0	0	0	0	1	0	0	0	0	0	0	0	0	unclassified(100)	unclassified(100)	unclassified(100)	unclassified(100)	unclassified(100)
Otu1049	0	0	0	0	0	2	0	0	0	0	0	0	0	0	unclassified(100)	unclassified(100)	unclassified(100)	unclassified(100)	unclassified(100)
Otu1050	1	0	0	0	0	0	0	0	0	0	0	0	0	0	unclassified(100)	unclassified(100)	unclassified(100)	unclassified(100)	unclassified(100)
Otu1051	0	0	2	0	0	0	0	0	0	0	0	0	0	0	Proteobacteria(100)	Alphaproteobacteria(100)	Sphingomonadales(100)	Sphingomonadaceae(100)	unclassified(100)
Otu1052	0	0	2	0	0	0	0	0	0	0	0	0	0	0	unclassified(100)	unclassified(100)	unclassified(100)	unclassified(100)	unclassified(100)
Otu1053	0	0	0	0	0	0	0	0	0	0	0	0	1	0	Proteobacteria(100)	Alphaproteobacteria(100)	Sphingomonadales(100)	Sphingomonadaceae(100)	Sphingomonas(100)
Otu1054	0	0	0	0	0	2	0	0	0	0	0	0	0	0	Proteobacteria(100)	Betaproteobacteria(100)	unclassified(100)	unclassified(100)	unclassified(100)
Otu1055	0	0	1	0	0	0	0	0	0	0	0	0	0	0	unclassified(100)	unclassified(100)	unclassified(100)	unclassified(100)	unclassified(100)
Otu1056	0	0	1	0	0	0	0	0	1	0	0	0	0	0	unclassified(100)	unclassified(100)	unclassified(100)	unclassified(100)	unclassified(100)
Otu1058	0	1	0	0	0	0	0	0	0	0	0	0	0	0	unclassified(100)	unclassified(100)	unclassified(100)	unclassified(100)	unclassified(100)
Otu1059	0	0	0	2	0	0	0	0	0	0	0	0	0	0	Proteobacteria(100)	unclassified(100)	unclassified(100)	unclassified(100)	unclassified(100)
Otu1060	0	0	0	0	0	1	0	0	0	0	0	0	1	0	Proteobacteria(100)	Deltaproteobacteria(100)	Bdellovibrionales(100)	Bdellovibrionaceae(100)	Bdellovibrio(100)
Otu1061	0	0	0	0	0	2	0	0	0	0	0	0	0	0	unclassified(100)	unclassified(100)	unclassified(100)	unclassified(100)	unclassified(100)
Otu1062	0	0	0	0	0	0	0	0	0	0	1	1	0	0	Proteobacteria(100)	Alphaproteobacteria(100)	Rhizobiales(100)	Phyllobacteriaceae(100)	Mesorhizobium(100)
Otu1063	0	0	0	1	0	0	0	0	0	0	0	0	0	0	Proteobacteria(100)	Betaproteobacteria(100)	Methylophilales(100)	Methylophilaceae(100)	Methylovorus(100)
Otu1064	0	0	0	0	0	0	1	0	0	0	0	0	0	0	unclassified(100)	unclassified(100)	unclassified(100)	unclassified(100)	unclassified(100)
Otu1065	0	0	0	0	1	0	0	0	0	0	0	0	0	0	Actinobacteria(100)	Actinobacteria(100)	Actinomycetales(100)	unclassified(100)	unclassified(100)
Otu1066	0	0	0	0	0	0	1	0	0	0	0	0	0	0	Proteobacteria(100)	Betaproteobacteria(100)	unclassified(100)	unclassified(100)	unclassified(100)
Otu1067	0	0	0	0	0	0	0	0	0	0	2	0	0	0	Proteobacteria(100)	Alphaproteobacteria(100)	Rhizobiales(100)	unclassified(100)	unclassified(100)
Otu1068	0	0	0	0	1	0	0	0	0	0	0	0	0	0	Proteobacteria(100)	Alphaproteobacteria(100)	unclassified(100)	unclassified(100)	unclassified(100)
Otu1069	0	0	0	0	0	0	1	0	0	0	0	0	0	0	Proteobacteria(100)	Alphaproteobacteria(100)	unclassified(100)	unclassified(100)	unclassified(100)
Otu1071	0	0	2	0	0	0	0	0	0	0	0	0	0	0	unclassified(100)	unclassified(100)	unclassified(100)	unclassified(100)	unclassified(100)
Otu1072	0	0	0	0	1	0	0	0	0	0	0	0	0	0	unclassified(100)	unclassified(100)	unclassified(100)	unclassified(100)	unclassified(100)
Otu1073	0	0	0	0	0	0	0	0	0	0	2	0	0	0	Proteobacteria(100)	Betaproteobacteria(100)	Burkholderiales(100)	unclassified(100)	unclassified(100)
Otu1074	0	0	0	0	0	0	2	0	0	0	0	0	0	0	Proteobacteria(100)	Betaproteobacteria(100)	Burkholderiales(100)	Oxalobacteraceae(100)	unclassified(100)
Otu1075	0	0	0	0	1	0	0	0	0	0	0	0	0	0	Actinobacteria(100)	Actinobacteria(100)	Actinomycetales(100)	unclassified(100)	unclassified(100)
Otu1076	0	0	0	0	0	0	1	0	0	0	0	0	0	0	Proteobacteria(100)	unclassified(100)	unclassified(100)	unclassified(100)	unclassified(100)
Otu1077	0	0	0	0	0	0	2	0	0	0	0	0	0	0	Proteobacteria(100)	Alphaproteobacteria(100)	Rhizobiales(100)	unclassified(100)	unclassified(100)
Otu1078	0	0	0	0	1	0	0	0	0	0	0	0	0	0	unclassified(100)	unclassified(100)	unclassified(100)	unclassified(100)	unclassified(100)
Otu1079	0	0	0	0	0	0	0	0	0	0	2	0	0	0	Proteobacteria(100)	unclassified(100)	unclassified(100)	unclassified(100)	unclassified(100)
Otu1080	0	0	0	0	0	0	1	0	0	0	0	0	0	0	Proteobacteria(100)	Alphaproteobacteria(100)	unclassified(100)	unclassified(100)	unclassified(100)
Otu1081	0	0	0	0	0	0	2	0	0	0	0	0	0	0	Proteobacteria(100)	Alphaproteobacteria(100)	Rhodospirillales(100)	Rhodospirillaceae(100)	Dongia(100)
Otu1082	0	0	0	0	1	0	0	0	0	0	0	0	0	0	unclassified(100)	unclassified(100)	unclassified(100)	unclassified(100)	unclassified(100)
Otu1083	0	0	0	0	1	0	0	0	0	0	0	0	0	0	unclassified(100)	unclassified(100)	unclassified(100)	unclassified(100)	unclassified(100)
Otu1084	0	0	0	0	0	0	2	0	0	0	0	0	0	0	Bacteroidetes(100)	Sphingobacteria(100)	Sphingobacteriales(100)	unclassified(100)	unclassified(100)
Otu1085	0	0	0	0	2	0	0	0	0	0	0	0	0	0	unclassified(100)	unclassified(100)	unclassified(100)	unclassified(100)	unclassified(100)
Otu1086	0	0	0	0	0	0	1	0	0	0	0	0	0	0	unclassified(100)	unclassified(100)	unclassified(100)	unclassified(100)	unclassified(100)
Otu1088	0	0	0	0	1	0	0	0	0	0	0	0	0	0	Firmicutes(100)	unclassified(100)	unclassified(100)	unclassified(100)	unclassified(100)
Otu1089	0	0	0	0	1	0	0	0	0	0	0	0	0	0	unclassified(100)	unclassified(100)	unclassified(100)	unclassified(100)	unclassified(100)
Otu1090	0	0	0	0	2	0	0	0	0	0	0	0	0	0	Proteobacteria(100)	unclassified(100)	unclassified(100)	unclassified(100)	unclassified(100)
Otu1091	0	0	0	0	2	0	0	0	0	0	0	0	0	0	Actinobacteria(100)	Actinobacteria(100)	Actinomycetales(100)	Nocardioidaceae(100)	Marmoricola(100)
Otu1092	0	0	0	0	1	0	0	0	0	0	0	0	0	0	Proteobacteria(100)	Alphaproteobacteria(100)	Rhodospirillales(100)	Acetobacteraceae(100)	unclassified(100)
Otu1093	0	0	0	0	2	0	0	0	0	0	0	0	0	0	Proteobacteria(100)	Gammaproteobacteria(100)	Xanthomonadales(100)	Xanthomonadaceae(100)	unclassified(100)
Otu1094	0	0	0	0	0	0	0	0	0	0	2	0	0	0	Bacteroidetes(100)	Sphingobacteria(100)	Sphingobacteriales(100)	Chitinophagaceae(100)	unclassified(100)
Otu1095	0	0	0	0	1	0	0	0	0	0	0	0	0	0	unclassified(100)	unclassified(100)	unclassified(100)	unclassified(100)	unclassified(100)
Otu1096	0	0	0	0	0	0	0	0	0	0	2	0	0	0	Actinobacteria(100)	Actinobacteria(100)	Actinomycetales(100)	Streptosporangiaceae(100)	Herbidospora(100)
Otu1097	0	0	0	0	1	0	0	0	0	0	0	0	0	0	unclassified(100)	unclassified(100)	unclassified(100)	unclassified(100)	unclassified(100)
Otu1098	0	0	0	0	0	0	1	0	0	0	0	0	0	0	Proteobacteria(100)	Alphaproteobacteria(100)	Rhodospirillales(100)	Rhodospirillaceae(100)	unclassified(100)
Otu1099	0	0	0	0	0	0	0	0	0	0	2	0	0	0	unclassified(100)	unclassified(100)	unclassified(100)	unclassified(100)	unclassified(100)
Otu1100	0	0	0	0	0	0	1	0	0	0	0	0	0	0	unclassified(100)	unclassified(100)	unclassified(100)	unclassified(100)	unclassified(100)
Otu1101	0	0	0	0	0	0	0	0	0	0	2	0	0	0	Proteobacteria(100)	Gammaproteobacteria(100)	unclassified(100)	unclassified(100)	unclassified(100)
Otu1102	0	0	0	0	0	0	0	0	0	0	2	0	0	0	Proteobacteria(100)	Alphaproteobacteria(100)	Rhizobiales(100)	Rhizobiaceae(100)	Rhizobium(100)
Otu1103	0	0	0	0	0	0	2	0	0	0	0	0	0	0	Proteobacteria(100)	Gammaproteobacteria(100)	unclassified(100)	unclassified(100)	unclassified(100)
Otu1104	0	0	0	0	2	0	0	0	0	0	0	0	0	0	Proteobacteria(100)	Betaproteobacteria(100)	unclassified(100)	unclassified(100)	unclassified(100)
Otu1105	0	0	0	0	0	0	0	0	0	0	2	0	0	0	Proteobacteria(100)	Betaproteobacteria(100)	Burkholderiales(100)	unclassified(100)	unclassified(100)
Otu1106	0	0	0	0	0	0	0	0	0	0	2	0	0	0	Proteobacteria(100)	Alphaproteobacteria(100)	Rhizobiales(100)	Phyllobacteriaceae(100)	unclassified(100)
Otu1107	0	0	0	0	0	0	2	0	0	0	0	0	0	0	Proteobacteria(100)	unclassified(100)	unclassified(100)	unclassified(100)	unclassified(100)
Otu1108	0	0	0	0	0	0	1	0	0	0	0	0	0	0	Proteobacteria(100)	Gammaproteobacteria(100)	Pseudomonadales(100)	Pseudomonadaceae(100)	Pseudomonas(100)
Otu1109	0	0	0	0	0	0	2	0	0	0	0	0	0	0	unclassified(100)	unclassified(100)	unclassified(100)	unclassified(100)	unclassified(100)
Otu1110	0	0	0	0	0	0	2	0	0	0	0	0	0	0	unclassified(100)	unclassified(100)	unclassified(100)	unclassified(100)	unclassified(100)
Otu1111	0	0	0	0	0	0	1	0	0	0	0	0	0	0	Proteobacteria(100)	unclassified(100)	unclassified(100)	unclassified(100)	unclassified(100)
Otu1112	0	0	0	0	1	0	0	0	0	0	0	0	0	0	Actinobacteria(100)	Actinobacteria(100)	Actinomycetales(100)	Pseudonocardiaceae(100)	unclassified(100)
Otu1114	0	0	0	0	0	0	0	0	0	0	2	0	0	0	Proteobacteria(100)	Betaproteobacteria(100)	unclassified(100)	unclassified(100)	unclassified(100)
Otu1115	0	0	0	0	1	0	0	0	0	0	0	0	0	0	unclassified(100)	unclassified(100)	unclassified(100)	unclassified(100)	unclassified(100)
Otu1116	0	0	0	2	0	0	0	0	0	0	0	0	0	0	unclassified(100)	unclassified(100)	unclassified(100)	unclassified(100)	unclassified(100)
Otu1117	0	0	0	2	0	0	0	0	0	0	0	0	0	0	Actinobacteria(100)	Actinobacteria(100)	Actinomycetales(100)	Geodermatophilaceae(100)	unclassified(100)
Otu1118	0	0	0	2	0	0	0	0	0	0	0	0	0	0	unclassified(100)	unclassified(100)	unclassified(100)	unclassified(100)	unclassified(100)
Otu1119	0	0	0	1	0	0	0	0	0	0	0	0	0	0	unclassified(100)	unclassified(100)	unclassified(100)	unclassified(100)	unclassified(100)
Otu1120	0	0	0	0	0	0	0	0	0	0	0	0	1	0	Proteobacteria(100)	Gammaproteobacteria(100)	Xanthomonadales(100)	Xanthomonadaceae(100)	unclassified(100)
Otu1121	0	0	0	0	1	0	0	0	0	0	0	0	0	0	unclassified(100)	unclassified(100)	unclassified(100)	unclassified(100)	unclassified(100)
Otu1122	0	0	0	0	0	0	0	0	0	0	2	0	0	0	Bacteroidetes(100)	Sphingobacteria(100)	Sphingobacteriales(100)	unclassified(100)	unclassified(100)
Otu1123	0	0	0	0	2	0	0	0	0	0	0	0	0	0	unclassified(100)	unclassified(100)	unclassified(100)	unclassified(100)	unclassified(100)
Otu1124	0	0	0	0	0	2	0	0	0	0	0	0	0	0	Proteobacteria(100)	unclassified(100)	unclassified(100)	unclassified(100)	unclassified(100)
Otu1126	0	0	0	0	0	2	0	0	0	0	0	0	0	0	Proteobacteria(100)	Alphaproteobacteria(100)	Rhodospirillales(100)	Acetobacteraceae(100)	unclassified(100)
Otu1127	0	0	0	0	0	0	0	0	0	0	0	1	0	0	Proteobacteria(100)	Alphaproteobacteria(100)	Caulobacterales(100)	Caulobacteraceae(100)	Brevundimonas(100)
Otu1128	0	0	0	0	2	0	0	0	0	0	0	0	0	0	Proteobacteria(100)	Gammaproteobacteria(100)	Xanthomonadales(100)	Xanthomonadaceae(100)	unclassified(100)
Otu1129	0	0	0	2	0	0	0	0	0	0	0	0	0	0	unclassified(100)	unclassified(100)	unclassified(100)	unclassified(100)	unclassified(100)
Otu1130	0	0	0	0	0	1	0	0	0	0	0	0	0	0	Proteobacteria(100)	Betaproteobacteria(100)	unclassified(100)	unclassified(100)	unclassified(100)
Otu1131	0	0	0	0	0	2	0	0	0	0	0	0	0	0	unclassified(100)	unclassified(100)	unclassified(100)	unclassified(100)	unclassified(100)
Otu1132	0	0	0	0	0	2	0	0	0	0	0	0	0	0	Proteobacteria(100)	unclassified(100)	unclassified(100)	unclassified(100)	unclassified(100)
Otu1133	0	0	0	0	0	2	0	0	0	0	0	0	0	0	Proteobacteria(100)	Gammaproteobacteria(100)	Xanthomonadales(100)	Xanthomonadaceae(100)	unclassified(100)
Otu1134	0	0	0	0	0	0	0	0	0	0	2	0	0	0	Proteobacteria(100)	Alphaproteobacteria(100)	Rhizobiales(100)	Hyphomicrobiaceae(100)	Devosia(100)
Otu1135	0	0	0	0	0	0	0	0	0	0	2	0	0	0	Proteobacteria(100)	Betaproteobacteria(100)	unclassified(100)	unclassified(100)	unclassified(100)
Otu1136	0	0	0	1	0	0	0	0	0	0	0	0	0	0	Acidobacteria(100)	Acidobacteria_Gp1(100)	Acidobacteria_Gp1_order_incertae_sedis(100)	Acidobacteria_Gp1_family_incertae_sedis(100)	Gp1(100)
Otu1137	0	1	1	0	0	0	0	0	0	0	0	0	0	0	Proteobacteria(100)	Betaproteobacteria(100)	Burkholderiales(100)	unclassified	unclassified
Otu1138	0	0	0	0	0	1	0	0	0	0	0	0	0	0	Proteobacteria(100)	unclassified(100)	unclassified(100)	unclassified(100)	unclassified(100)
Otu1139	0	1	0	0	1	0	0	0	0	0	0	0	0	0	Proteobacteria(100)	Deltaproteobacteria(100)	Myxococcales(100)	unclassified(100)	unclassified(100)
Otu1140	0	0	0	1	0	0	0	0	0	0	0	0	0	0	unclassified(100)	unclassified(100)	unclassified(100)	unclassified(100)	unclassified(100)
Otu1141	0	0	2	0	0	0	0	0	0	0	0	0	0	0	unclassified(100)	unclassified(100)	unclassified(100)	unclassified(100)	unclassified(100)
Otu1142	0	0	0	0	0	0	2	0	0	0	0	0	0	0	unclassified(100)	unclassified(100)	unclassified(100)	unclassified(100)	unclassified(100)
Otu1143	0	0	0	2	0	0	0	0	0	0	0	0	0	0	Proteobacteria(100)	unclassified(100)	unclassified(100)	unclassified(100)	unclassified(100)
Otu1144	0	0	0	0	1	0	0	0	0	0	0	0	0	0	Proteobacteria(100)	Alphaproteobacteria(100)	Rhizobiales(100)	unclassified(100)	unclassified(100)
Otu1146	0	0	0	0	2	0	0	0	0	0	0	0	0	0	Proteobacteria(100)	Alphaproteobacteria(100)	unclassified(100)	unclassified(100)	unclassified(100)
Otu1147	0	0	0	0	2	0	0	0	0	0	0	0	0	0	Proteobacteria(100)	Gammaproteobacteria(100)	unclassified(100)	unclassified(100)	unclassified(100)
Otu1148	0	0	0	1	0	0	0	0	0	0	0	0	0	0	Proteobacteria(100)	Deltaproteobacteria(100)	Myxococcales(100)	unclassified(100)	unclassified(100)
Otu1149	0	0	0	2	0	0	0	0	0	0	0	0	0	0	Actinobacteria(100)	Actinobacteria(100)	Solirubrobacterales(100)	Solirubrobacteraceae(100)	Solirubrobacter(100)
Otu1150	0	0	0	0	0	0	0	0	0	0	2	0	0	0	Proteobacteria(100)	unclassified(100)	unclassified(100)	unclassified(100)	unclassified(100)
Otu1151	0	0	0	0	0	1	0	0	0	0	0	0	0	0	Proteobacteria(100)	unclassified(100)	unclassified(100)	unclassified(100)	unclassified(100)
Otu1154	0	0	0	2	0	0	0	0	0	0	0	0	0	0	unclassified(100)	unclassified(100)	unclassified(100)	unclassified(100)	unclassified(100)
Otu1155	0	0	0	2	0	0	0	0	0	0	0	0	0	0	unclassified(100)	unclassified(100)	unclassified(100)	unclassified(100)	unclassified(100)
Otu1156	0	0	0	2	0	0	0	0	0	0	0	0	0	0	unclassified(100)	unclassified(100)	unclassified(100)	unclassified(100)	unclassified(100)
Otu1157	0	0	0	1	0	0	0	0	0	0	0	0	0	0	unclassified(100)	unclassified(100)	unclassified(100)	unclassified(100)	unclassified(100)
Otu1158	0	0	0	0	0	0	0	0	0	0	2	0	0	0	unclassified(100)	unclassified(100)	unclassified(100)	unclassified(100)	unclassified(100)
Otu1159	0	0	0	0	0	0	0	0	0	0	2	0	0	0	Proteobacteria(100)	unclassified(100)	unclassified(100)	unclassified(100)	unclassified(100)
Otu1160	0	0	0	1	0	0	0	0	0	0	0	0	0	0	Proteobacteria(100)	unclassified(100)	unclassified(100)	unclassified(100)	unclassified(100)
Otu1162	0	0	0	2	0	0	0	0	0	0	0	0	0	0	Proteobacteria(100)	unclassified(100)	unclassified(100)	unclassified(100)	unclassified(100)
Otu1167	0	0	0	0	1	0	0	0	0	0	0	0	0	0	unclassified(100)	unclassified(100)	unclassified(100)	unclassified(100)	unclassified(100)
Otu1169	1	0	0	0	0	0	0	0	0	0	0	0	0	1	unclassified(100)	unclassified(100)	unclassified(100)	unclassified(100)	unclassified(100)
Otu1170	0	0	0	0	0	0	0	1	0	0	1	0	0	0	Proteobacteria(100)	Betaproteobacteria(100)	Burkholderiales(100)	Oxalobacteraceae(100)	unclassified(100)
Otu1171	0	0	0	1	0	0	0	0	0	0	0	0	0	1	Proteobacteria(100)	Betaproteobacteria(100)	unclassified(100)	unclassified(100)	unclassified(100)
Otu1172	0	0	0	0	0	0	0	2	0	0	0	0	0	0	Proteobacteria(100)	unclassified(100)	unclassified(100)	unclassified(100)	unclassified(100)
Otu1173	0	0	0	0	0	0	0	0	1	0	0	0	0	0	Proteobacteria(100)	Betaproteobacteria(100)	Burkholderiales(100)	unclassified	unclassified
Otu1177	0	0	0	0	0	0	0	1	0	0	0	0	0	0	unclassified(100)	unclassified(100)	unclassified(100)	unclassified(100)	unclassified(100)
Otu1178	2	0	0	0	0	0	0	0	0	0	0	0	0	0	unclassified(100)	unclassified(100)	unclassified(100)	unclassified(100)	unclassified(100)
Otu1180	0	0	0	0	0	0	0	1	0	0	0	0	0	0	Proteobacteria(100)	unclassified(100)	unclassified(100)	unclassified(100)	unclassified(100)
Otu1181	2	0	0	0	0	0	0	0	0	0	0	0	0	0	Acidobacteria(100)	Acidobacteria_Gp3(100)	unclassified(100)	unclassified(100)	unclassified(100)
Otu1182	2	0	0	0	0	0	0	0	0	0	0	0	0	0	Deinococcus-Thermus(100)	Deinococci(100)	Deinococcales(100)	Deinococcaceae(100)	unclassified(100)
Otu1183	0	0	0	0	0	0	0	0	1	0	0	0	0	0	Proteobacteria(100)	Alphaproteobacteria(100)	Rhizobiales(100)	Bradyrhizobiaceae(100)	unclassified(100)
Otu1184	0	0	0	0	1	0	0	0	0	0	0	0	0	0	Proteobacteria(100)	Alphaproteobacteria(100)	Rhizobiales(100)	unclassified(100)	unclassified(100)
Otu1186	0	2	0	0	0	0	0	0	0	0	0	0	0	0	Proteobacteria(100)	Alphaproteobacteria(100)	Rhodospirillales(100)	Rhodospirillaceae(100)	unclassified(100)
Otu1187	0	2	0	0	0	0	0	0	0	0	0	0	0	0	Actinobacteria(100)	Actinobacteria(100)	Actinomycetales(100)	unclassified(100)	unclassified(100)
Otu1188	0	1	0	0	0	0	0	0	0	0	0	0	0	0	Proteobacteria(100)	Betaproteobacteria(100)	unclassified(100)	unclassified(100)	unclassified(100)
Otu1189	0	0	0	0	0	0	0	0	2	0	0	0	0	0	unclassified(100)	unclassified(100)	unclassified(100)	unclassified(100)	unclassified(100)
Otu1190	0	1	0	0	0	0	0	0	0	0	0	0	0	0	Proteobacteria(100)	unclassified(100)	unclassified(100)	unclassified(100)	unclassified(100)
Otu1192	0	1	0	0	0	0	0	0	0	0	0	0	0	0	Proteobacteria(100)	Alphaproteobacteria(100)	unclassified(100)	unclassified(100)	unclassified(100)
Otu1193	0	0	0	0	0	0	0	0	2	0	0	0	0	0	Proteobacteria(100)	unclassified(100)	unclassified(100)	unclassified(100)	unclassified(100)
Otu1195	0	0	0	0	0	0	0	0	0	1	0	0	0	0	Proteobacteria(100)	Gammaproteobacteria(100)	Xanthomonadales(100)	Xanthomonadaceae(100)	unclassified(100)
Otu1196	0	0	0	0	0	0	0	1	0	0	0	0	0	0	Bacteroidetes(100)	Sphingobacteria(100)	Sphingobacteriales(100)	Chitinophagaceae(100)	unclassified(100)
Otu1198	0	0	0	0	0	0	0	0	0	1	0	0	0	0	Deinococcus-Thermus(100)	Deinococci(100)	Deinococcales(100)	Deinococcaceae(100)	unclassified(100)
Otu1200	0	0	0	0	0	0	0	0	0	1	0	0	0	0	Proteobacteria(100)	Betaproteobacteria(100)	Burkholderiales(100)	Alcaligenaceae(100)	unclassified(100)
Otu1201	0	0	0	0	0	0	0	0	0	1	0	0	0	0	Bacteroidetes(100)	Sphingobacteria(100)	Sphingobacteriales(100)	unclassified(100)	unclassified(100)
Otu1202	0	0	0	0	0	0	0	0	0	1	0	0	0	0	Proteobacteria(100)	unclassified(100)	unclassified(100)	unclassified(100)	unclassified(100)
Otu1203	0	0	0	0	0	0	0	0	0	1	0	0	0	0	Bacteroidetes(100)	Sphingobacteria(100)	Sphingobacteriales(100)	Chitinophagaceae(100)	Chitinophaga(100)
Otu1206	1	1	0	0	0	0	0	0	0	0	0	0	0	0	unclassified	unclassified	unclassified	unclassified	unclassified
Otu1207	0	0	0	0	0	0	0	0	0	0	0	1	0	0	Proteobacteria(100)	Gammaproteobacteria(100)	Xanthomonadales(100)	Xanthomonadaceae(100)	unclassified(100)
Otu1208	2	0	0	0	0	0	0	0	0	0	0	0	0	0	Proteobacteria(100)	Alphaproteobacteria(100)	unclassified(100)	unclassified(100)	unclassified(100)
Otu1209	1	0	0	0	0	0	0	0	0	0	0	0	0	0	unclassified(100)	unclassified(100)	unclassified(100)	unclassified(100)	unclassified(100)
Otu1210	0	0	0	0	0	0	0	1	0	0	0	0	0	0	Proteobacteria(100)	Betaproteobacteria(100)	unclassified(100)	unclassified(100)	unclassified(100)
Otu1211	0	0	0	0	0	0	0	1	0	0	0	0	0	0	Proteobacteria(100)	Betaproteobacteria(100)	unclassified(100)	unclassified(100)	unclassified(100)
Otu1213	0	0	0	0	0	0	0	1	0	0	0	0	0	0	Bacteroidetes(100)	Sphingobacteria(100)	Sphingobacteriales(100)	Cytophagaceae(100)	Dyadobacter(100)
Otu1214	1	0	0	0	0	0	0	0	0	0	0	0	0	0	Chloroflexi(100)	unclassified(100)	unclassified(100)	unclassified(100)	unclassified(100)
Otu1216	0	0	0	0	0	0	0	1	0	0	0	0	0	0	Proteobacteria(100)	Betaproteobacteria(100)	unclassified(100)	unclassified(100)	unclassified(100)
Otu1217	0	1	0	0	0	0	0	0	0	0	0	0	0	0	unclassified(100)	unclassified(100)	unclassified(100)	unclassified(100)	unclassified(100)
Otu1218	0	0	0	0	0	0	0	1	0	0	0	0	0	0	unclassified(100)	unclassified(100)	unclassified(100)	unclassified(100)	unclassified(100)
Otu1219	0	0	0	0	0	0	0	1	0	0	0	0	0	0	unclassified(100)	unclassified(100)	unclassified(100)	unclassified(100)	unclassified(100)
Otu1220	2	0	0	0	0	0	0	0	0	0	0	0	0	0	Proteobacteria(100)	Alphaproteobacteria(100)	Alphaproteobacteria_order_incertae_sedis(100)	Alphaproteobacteria_family_incertae_sedis(100)	Rhizomicrobium(100)
Otu1221	2	0	0	0	0	0	0	0	0	0	0	0	0	0	Proteobacteria(100)	Betaproteobacteria(100)	unclassified(100)	unclassified(100)	unclassified(100)
Otu1223	0	0	0	0	0	0	0	1	0	0	0	0	0	0	Firmicutes(100)	unclassified(100)	unclassified(100)	unclassified(100)	unclassified(100)
Otu1224	0	0	0	0	0	0	0	1	0	0	0	0	0	0	Proteobacteria(100)	unclassified(100)	unclassified(100)	unclassified(100)	unclassified(100)
Otu1225	0	1	0	0	0	0	0	0	0	0	0	0	0	0	Firmicutes(100)	Bacilli(100)	Bacillales(100)	Bacillaceae_2(100)	unclassified(100)
Otu1226	0	0	0	0	0	0	0	0	0	0	0	2	0	0	Acidobacteria(100)	Acidobacteria_Gp3(100)	Acidobacteria_Gp3_order_incertae_sedis(100)	Acidobacteria_Gp3_family_incertae_sedis(100)	Gp3(100)
Otu1228	1	0	0	0	0	0	0	0	0	0	0	0	0	0	unclassified(100)	unclassified(100)	unclassified(100)	unclassified(100)	unclassified(100)
Otu1229	0	0	0	0	0	0	0	2	0	0	0	0	0	0	Proteobacteria(100)	Betaproteobacteria(100)	Burkholderiales(100)	Oxalobacteraceae(100)	Telluria(100)
Otu1230	0	0	0	0	0	0	0	2	0	0	0	0	0	0	unclassified(100)	unclassified(100)	unclassified(100)	unclassified(100)	unclassified(100)
Otu1231	0	0	0	0	0	0	0	1	0	0	0	0	0	0	Proteobacteria(100)	Betaproteobacteria(100)	unclassified(100)	unclassified(100)	unclassified(100)
Otu1232	0	0	0	1	0	0	0	0	0	0	0	0	0	0	unclassified(100)	unclassified(100)	unclassified(100)	unclassified(100)	unclassified(100)
Otu1234	0	0	0	0	0	0	0	0	0	0	0	0	0	2	Proteobacteria(100)	Alphaproteobacteria(100)	unclassified(100)	unclassified(100)	unclassified(100)
Otu1235	0	0	0	0	0	0	0	1	0	0	0	0	0	0	Proteobacteria(100)	Betaproteobacteria(100)	unclassified(100)	unclassified(100)	unclassified(100)
Otu1236	0	0	0	0	1	0	0	0	0	0	0	0	0	0	Acidobacteria(100)	Acidobacteria_Gp10(100)	Acidobacteria_Gp10_order_incertae_sedis(100)	Acidobacteria_Gp10_family_incertae_sedis(100)	Gp10(100)
Otu1238	0	0	0	0	0	0	0	2	0	0	0	0	0	0	Proteobacteria(100)	Betaproteobacteria(100)	Burkholderiales(100)	Oxalobacteraceae(100)	unclassified(100)
Otu1239	0	0	0	0	1	0	0	0	0	0	0	0	0	0	Proteobacteria(100)	Alphaproteobacteria(100)	Rhodospirillales(100)	Acetobacteraceae(100)	unclassified(100)
Otu1241	2	0	0	0	0	0	0	0	0	0	0	0	0	0	unclassified(100)	unclassified(100)	unclassified(100)	unclassified(100)	unclassified(100)
Otu1243	0	0	0	0	0	0	0	1	0	0	0	0	0	0	unclassified(100)	unclassified(100)	unclassified(100)	unclassified(100)	unclassified(100)
Otu1244	0	0	0	0	0	0	0	1	0	0	0	0	0	0	Proteobacteria(100)	Alphaproteobacteria(100)	unclassified(100)	unclassified(100)	unclassified(100)
Otu1246	0	0	0	0	0	0	0	2	0	0	0	0	0	0	Proteobacteria(100)	Gammaproteobacteria(100)	Xanthomonadales(100)	Xanthomonadaceae(100)	unclassified(100)
Otu1247	0	0	0	0	0	0	0	1	0	0	0	0	0	0	Proteobacteria(100)	unclassified(100)	unclassified(100)	unclassified(100)	unclassified(100)
Otu1248	0	0	0	0	0	0	0	1	0	0	0	0	0	0	Proteobacteria(100)	unclassified(100)	unclassified(100)	unclassified(100)	unclassified(100)
Otu1249	0	0	0	0	0	0	0	1	0	0	0	0	0	0	Bacteroidetes(100)	Sphingobacteria(100)	Sphingobacteriales(100)	Chitinophagaceae(100)	unclassified(100)
Otu1251	1	0	0	0	0	0	0	0	0	1	0	0	0	0	Proteobacteria(100)	Alphaproteobacteria(100)	Rhizobiales(100)	unclassified	unclassified
Otu1252	0	0	0	0	0	0	0	2	0	0	0	0	0	0	Bacteroidetes(100)	Sphingobacteria(100)	Sphingobacteriales(100)	unclassified(100)	unclassified(100)
Otu1253	0	0	0	0	0	0	0	0	0	2	0	0	0	0	Proteobacteria(100)	Betaproteobacteria(100)	Burkholderiales(100)	Alcaligenaceae(100)	unclassified(100)
Otu1254	0	0	0	0	0	0	0	1	0	0	0	0	0	0	unclassified(100)	unclassified(100)	unclassified(100)	unclassified(100)	unclassified(100)
Otu1255	0	0	0	0	0	0	0	0	0	1	0	0	0	0	Proteobacteria(100)	unclassified(100)	unclassified(100)	unclassified(100)	unclassified(100)
Otu1256	0	0	0	0	0	0	0	0	0	1	0	0	0	0	Actinobacteria(100)	Actinobacteria(100)	Actinomycetales(100)	Microbacteriaceae(100)	Pseudoclavibacter(100)
Otu1257	0	0	0	0	0	0	0	0	2	0	0	0	0	0	unclassified(100)	unclassified(100)	unclassified(100)	unclassified(100)	unclassified(100)
Otu1259	0	0	0	0	0	0	0	0	2	0	0	0	0	0	Proteobacteria(100)	Alphaproteobacteria(100)	Rhodospirillales(100)	Acetobacteraceae(100)	Paracraurococcus(100)
Otu1260	0	0	0	0	0	0	0	0	2	0	0	0	0	0	Proteobacteria(100)	Alphaproteobacteria(100)	unclassified(100)	unclassified(100)	unclassified(100)
Otu1261	0	0	1	0	0	0	0	0	0	0	0	0	0	0	Proteobacteria(100)	Alphaproteobacteria(100)	unclassified	unclassified	unclassified
Otu1262	0	0	0	0	0	0	0	0	0	1	0	0	0	0	Proteobacteria(100)	Alphaproteobacteria(100)	Sphingomonadales(100)	Sphingomonadaceae(100)	unclassified(100)
Otu1263	0	0	0	0	0	0	0	0	0	0	0	1	0	1	unclassified(100)	unclassified(100)	unclassified(100)	unclassified(100)	unclassified(100)
Otu1264	1	0	0	0	1	0	0	0	0	0	0	0	0	0	Proteobacteria(100)	Alphaproteobacteria(100)	Rhizobiales(100)	unclassified(100)	unclassified(100)
Otu1267	0	0	0	0	0	0	0	0	2	0	0	0	0	0	Proteobacteria(100)	Alphaproteobacteria(100)	Rhizobiales(100)	unclassified(100)	unclassified(100)
Otu1269	0	1	0	0	0	0	0	0	0	0	0	0	0	0	Firmicutes(100)	unclassified(100)	unclassified(100)	unclassified(100)	unclassified(100)
Otu1270	0	1	0	0	0	0	0	0	0	0	0	0	0	0	unclassified(100)	unclassified(100)	unclassified(100)	unclassified(100)	unclassified(100)
Otu1271	0	1	0	0	0	0	0	0	0	0	0	0	0	0	unclassified(100)	unclassified(100)	unclassified(100)	unclassified(100)	unclassified(100)
Otu1272	0	0	0	0	0	0	1	0	0	0	0	0	0	0	Proteobacteria(100)	Gammaproteobacteria(100)	Legionellales(100)	Coxiellaceae(100)	Aquicella(100)
Otu1273	0	0	0	0	0	0	0	0	0	0	0	0	0	2	unclassified(100)	unclassified(100)	unclassified(100)	unclassified(100)	unclassified(100)
Otu1275	0	0	0	0	0	0	0	0	0	1	0	0	0	0	Proteobacteria(100)	unclassified(100)	unclassified(100)	unclassified(100)	unclassified(100)
Otu1277	0	0	0	0	0	0	0	0	0	2	0	0	0	0	Proteobacteria(100)	Alphaproteobacteria(100)	Rhizobiales(100)	Rhizobiaceae(100)	Ensifer(100)
Otu1278	0	0	0	0	0	0	0	0	0	0	0	0	0	2	Proteobacteria(100)	Gammaproteobacteria(100)	Xanthomonadales(100)	Xanthomonadaceae(100)	unclassified(100)
Otu1279	0	0	0	0	0	0	0	0	0	0	0	0	0	1	Bacteroidetes(100)	Flavobacteria(100)	Flavobacteriales(100)	Flavobacteriaceae(100)	unclassified(100)
Otu1280	0	0	0	0	0	0	0	0	0	0	0	0	0	2	unclassified(100)	unclassified(100)	unclassified(100)	unclassified(100)	unclassified(100)
Otu1282	0	0	0	0	0	0	0	0	0	2	0	0	0	0	Proteobacteria(100)	Alphaproteobacteria(100)	unclassified(100)	unclassified(100)	unclassified(100)
Otu1283	0	0	0	0	0	0	0	0	0	2	0	0	0	0	Deinococcus-Thermus(100)	Deinococci(100)	Deinococcales(100)	Deinococcaceae(100)	unclassified(100)
Otu1284	0	0	0	0	0	0	0	0	1	0	0	0	0	0	Proteobacteria(100)	Alphaproteobacteria(100)	Sphingomonadales(100)	Sphingomonadaceae(100)	unclassified(100)
Otu1285	0	0	0	0	0	1	0	1	0	0	0	0	0	0	Proteobacteria(100)	Betaproteobacteria(100)	unclassified(100)	unclassified(100)	unclassified(100)
Otu1286	0	0	0	0	0	0	0	0	0	2	0	0	0	0	Proteobacteria(100)	unclassified(100)	unclassified(100)	unclassified(100)	unclassified(100)
Otu1287	0	0	0	0	0	0	0	0	0	1	0	0	0	0	Proteobacteria(100)	unclassified(100)	unclassified(100)	unclassified(100)	unclassified(100)
Otu1288	0	0	0	0	0	0	0	0	0	2	0	0	0	0	Bacteroidetes(100)	Sphingobacteria(100)	Sphingobacteriales(100)	unclassified(100)	unclassified(100)
Otu1289	0	0	0	0	0	0	0	0	0	1	0	0	0	0	Proteobacteria(100)	Betaproteobacteria(100)	Burkholderiales(100)	unclassified(100)	unclassified(100)
Otu1290	0	0	0	0	0	0	0	0	0	0	0	0	0	2	Proteobacteria(100)	Betaproteobacteria(100)	unclassified(100)	unclassified(100)	unclassified(100)
Otu1291	0	0	0	0	0	0	0	0	0	1	0	0	0	0	Proteobacteria(100)	Gammaproteobacteria(100)	Xanthomonadales(100)	Xanthomonadaceae(100)	unclassified(100)
Otu1292	0	0	0	0	0	0	0	0	0	2	0	0	0	0	Bacteroidetes(100)	Sphingobacteria(100)	Sphingobacteriales(100)	Chitinophagaceae(100)	unclassified(100)
Otu1293	0	0	0	0	0	0	0	0	0	1	0	0	0	0	Proteobacteria(100)	Betaproteobacteria(100)	Burkholderiales(100)	Alcaligenaceae(100)	unclassified(100)
Otu1294	0	0	0	0	0	0	0	0	0	1	0	0	0	0	Firmicutes(100)	Bacilli(100)	Bacillales(100)	Paenibacillaceae_1(100)	Paenibacillus(100)
Otu1295	0	1	0	0	0	0	0	0	0	0	0	0	0	0	Firmicutes(100)	Bacilli(100)	Bacillales(100)	Paenibacillaceae_1(100)	Paenibacillus(100)
Otu1296	0	0	0	0	0	0	0	0	0	1	0	0	0	0	Proteobacteria(100)	unclassified(100)	unclassified(100)	unclassified(100)	unclassified(100)
Otu1297	0	0	0	0	0	0	0	0	0	0	0	0	0	1	Proteobacteria(100)	Deltaproteobacteria(100)	Myxococcales(100)	unclassified(100)	unclassified(100)
Otu1298	0	1	0	0	0	0	0	0	0	0	0	0	0	0	Proteobacteria(100)	Betaproteobacteria(100)	Burkholderiales(100)	Burkholderiales_incertae_sedis(100)	unclassified(100)
Otu1299	0	1	0	0	0	0	0	0	0	0	0	0	0	0	Proteobacteria(100)	unclassified(100)	unclassified(100)	unclassified(100)	unclassified(100)
Otu1300	0	0	0	0	0	0	0	1	0	0	0	0	0	0	Proteobacteria(100)	Alphaproteobacteria(100)	Rhodospirillales(100)	unclassified(100)	unclassified(100)
Otu1303	0	1	0	0	0	0	0	0	0	0	0	0	0	0	Actinobacteria(100)	Actinobacteria(100)	Actinomycetales(100)	unclassified(100)	unclassified(100)
Otu1307	0	0	0	0	1	0	0	0	0	0	0	0	0	0	Acidobacteria(100)	Acidobacteria_Gp3(100)	unclassified(100)	unclassified(100)	unclassified(100)
Otu1308	0	0	0	0	0	0	0	0	0	1	0	0	0	0	unclassified(100)	unclassified(100)	unclassified(100)	unclassified(100)	unclassified(100)
Otu1309	0	2	0	0	0	0	0	0	0	0	0	0	0	0	unclassified(100)	unclassified(100)	unclassified(100)	unclassified(100)	unclassified(100)
Otu1311	0	2	0	0	0	0	0	0	0	0	0	0	0	0	unclassified(100)	unclassified(100)	unclassified(100)	unclassified(100)	unclassified(100)
Otu1312	0	1	0	0	0	0	0	0	0	0	0	0	0	0	Proteobacteria(100)	Alphaproteobacteria(100)	unclassified(100)	unclassified(100)	unclassified(100)
Otu1314	0	0	0	0	0	0	0	1	0	0	0	0	0	0	Proteobacteria(100)	Betaproteobacteria(100)	unclassified(100)	unclassified(100)	unclassified(100)
Otu1316	0	0	0	0	0	0	0	0	0	1	0	0	0	0	Proteobacteria(100)	Gammaproteobacteria(100)	Xanthomonadales(100)	Xanthomonadaceae(100)	unclassified(100)
Otu1318	0	1	0	0	0	0	0	0	0	0	0	0	0	0	Proteobacteria(100)	Alphaproteobacteria(100)	Rhizobiales(100)	Hyphomicrobiaceae(100)	Devosia(100)
Otu1319	0	0	0	0	0	0	0	0	2	0	0	0	0	0	Proteobacteria(100)	Deltaproteobacteria(100)	Myxococcales(100)	Cystobacteraceae(100)	unclassified(100)
Otu1321	0	1	0	0	0	0	0	0	0	0	0	0	0	0	unclassified(100)	unclassified(100)	unclassified(100)	unclassified(100)	unclassified(100)
Otu1322	0	1	0	0	0	0	0	0	0	0	0	0	0	0	unclassified(100)	unclassified(100)	unclassified(100)	unclassified(100)	unclassified(100)
Otu1323	0	0	0	0	0	0	0	0	2	0	0	0	0	0	Proteobacteria(100)	unclassified(100)	unclassified(100)	unclassified(100)	unclassified(100)
Otu1325	0	2	0	0	0	0	0	0	0	0	0	0	0	0	unclassified(100)	unclassified(100)	unclassified(100)	unclassified(100)	unclassified(100)
Otu1327	0	0	0	0	0	0	0	0	0	1	0	0	0	0	Actinobacteria(100)	Actinobacteria(100)	Actinomycetales(100)	Nocardioidaceae(100)	Kribbella(100)
Otu1328	0	0	0	0	0	0	0	0	0	0	0	2	0	0	Proteobacteria(100)	Alphaproteobacteria(100)	Rhodospirillales(100)	Rhodospirillaceae(100)	Skermanella(100)
Otu1330	0	1	0	0	0	0	0	0	0	0	0	0	0	0	Proteobacteria(100)	unclassified(100)	unclassified(100)	unclassified(100)	unclassified(100)
Otu1332	0	2	0	0	0	0	0	0	0	0	0	0	0	0	unclassified(100)	unclassified(100)	unclassified(100)	unclassified(100)	unclassified(100)
Otu1334	0	1	0	0	0	0	0	0	0	0	0	0	0	0	unclassified(100)	unclassified(100)	unclassified(100)	unclassified(100)	unclassified(100)
Otu1336	0	0	0	0	0	0	0	0	2	0	0	0	0	0	Proteobacteria(100)	unclassified(100)	unclassified(100)	unclassified(100)	unclassified(100)
Otu1337	0	1	0	0	0	0	0	0	0	0	0	0	0	0	unclassified(100)	unclassified(100)	unclassified(100)	unclassified(100)	unclassified(100)
Otu1338	0	1	0	0	0	0	0	0	0	0	0	0	0	0	unclassified(100)	unclassified(100)	unclassified(100)	unclassified(100)	unclassified(100)
Otu1339	0	0	2	0	0	0	0	0	0	0	0	0	0	0	unclassified(100)	unclassified(100)	unclassified(100)	unclassified(100)	unclassified(100)
Otu1340	0	0	2	0	0	0	0	0	0	0	0	0	0	0	unclassified(100)	unclassified(100)	unclassified(100)	unclassified(100)	unclassified(100)
Otu1341	0	0	0	0	0	0	0	0	0	0	0	1	0	0	Proteobacteria(100)	unclassified(100)	unclassified(100)	unclassified(100)	unclassified(100)
Otu1342	0	0	0	0	0	0	0	0	1	1	0	0	0	0	Proteobacteria(100)	Betaproteobacteria(100)	Burkholderiales(100)	Comamonadaceae(100)	unclassified(100)
Otu1343	0	0	0	0	0	0	0	0	0	0	0	0	2	0	Proteobacteria(100)	unclassified(100)	unclassified(100)	unclassified(100)	unclassified(100)
Otu1344	0	0	0	0	0	0	0	0	0	0	0	0	0	2	Proteobacteria(100)	Betaproteobacteria(100)	unclassified(100)	unclassified(100)	unclassified(100)
Otu1345	0	0	0	0	0	0	0	1	1	0	0	0	0	0	Proteobacteria(100)	Betaproteobacteria(100)	unclassified(100)	unclassified(100)	unclassified(100)
Otu1346	0	0	0	0	0	0	1	0	0	0	0	0	0	0	Proteobacteria(100)	Deltaproteobacteria(100)	Myxococcales(100)	Cystobacteraceae(100)	unclassified(100)
Otu1347	0	0	0	0	0	0	0	0	0	0	0	1	0	0	Proteobacteria(100)	Betaproteobacteria(100)	unclassified(100)	unclassified(100)	unclassified(100)
Otu1348	0	0	0	0	0	0	0	0	0	0	0	2	0	0	Bacteroidetes(100)	Sphingobacteria(100)	Sphingobacteriales(100)	Chitinophagaceae(100)	Terrimonas(100)
Otu1349	0	0	0	1	1	0	0	0	0	0	0	0	0	0	unclassified(100)	unclassified(100)	unclassified(100)	unclassified(100)	unclassified(100)
Otu1351	0	0	0	0	0	0	0	0	0	0	0	1	0	0	unclassified(100)	unclassified(100)	unclassified(100)	unclassified(100)	unclassified(100)
Otu1352	0	0	0	0	0	0	0	0	0	0	0	0	0	2	Proteobacteria(100)	Betaproteobacteria(100)	Burkholderiales(100)	Oxalobacteraceae(100)	unclassified(100)
Otu1353	0	0	2	0	0	0	0	0	0	0	0	0	0	0	unclassified(100)	unclassified(100)	unclassified(100)	unclassified(100)	unclassified(100)
Otu1354	0	0	0	0	0	0	0	0	0	0	0	0	0	2	Proteobacteria(100)	unclassified(100)	unclassified(100)	unclassified(100)	unclassified(100)
Otu1355	0	0	0	0	0	0	0	0	0	0	0	0	1	0	unclassified(100)	unclassified(100)	unclassified(100)	unclassified(100)	unclassified(100)
Otu1356	0	0	1	0	0	0	0	0	0	0	0	0	0	0	Proteobacteria(100)	Alphaproteobacteria(100)	Rhizobiales(100)	unclassified(100)	unclassified(100)
Otu1357	0	0	0	0	0	0	0	0	0	0	0	1	0	0	Proteobacteria(100)	Betaproteobacteria(100)	Burkholderiales(100)	unclassified(100)	unclassified(100)
Otu1358	2	0	0	0	0	0	0	0	0	0	0	0	0	0	Firmicutes(100)	Bacilli(100)	Bacillales(100)	Planococcaceae(100)	Caryophanon(100)
Otu1359	0	0	2	0	0	0	0	0	0	0	0	0	0	0	Proteobacteria(100)	Gammaproteobacteria(100)	Legionellales(100)	Coxiellaceae(100)	Aquicella(100)
Otu1360	0	0	0	0	0	0	0	0	0	0	0	0	0	1	unclassified(100)	unclassified(100)	unclassified(100)	unclassified(100)	unclassified(100)
Otu1361	0	0	0	0	0	0	0	0	0	0	0	0	0	2	unclassified(100)	unclassified(100)	unclassified(100)	unclassified(100)	unclassified(100)
Otu1362	0	0	0	0	0	0	0	0	2	0	0	0	0	0	Proteobacteria(100)	Gammaproteobacteria(100)	Xanthomonadales(100)	Xanthomonadaceae(100)	unclassified
Otu1363	2	0	0	0	0	0	0	0	0	0	0	0	0	0	Proteobacteria(100)	unclassified(100)	unclassified(100)	unclassified(100)	unclassified(100)
Otu1364	2	0	0	0	0	0	0	0	0	0	0	0	0	0	unclassified(100)	unclassified(100)	unclassified(100)	unclassified(100)	unclassified(100)
Otu1365	0	0	0	0	0	0	0	0	1	0	0	0	0	0	Actinobacteria(100)	Actinobacteria(100)	Actinomycetales(100)	unclassified(100)	unclassified(100)
Otu1366	0	0	2	0	0	0	0	0	0	0	0	0	0	0	unclassified(100)	unclassified(100)	unclassified(100)	unclassified(100)	unclassified(100)
Otu1367	0	0	1	0	0	0	0	0	0	0	0	0	0	0	Nitrospira(100)	Nitrospira(100)	Nitrospirales(100)	Nitrospiraceae(100)	Nitrospira(100)
Otu1368	0	0	0	1	0	0	1	0	0	0	0	0	0	0	Firmicutes(100)	Bacilli(100)	Bacillales(100)	Planococcaceae(100)	Solibacillus(100)
Otu1369	0	0	2	0	0	0	0	0	0	0	0	0	0	0	Deinococcus-Thermus(100)	Deinococci(100)	Deinococcales(100)	Deinococcaceae(100)	Deinococcus(100)
Otu1370	0	0	0	0	0	0	1	0	0	0	0	0	0	0	Proteobacteria(100)	Betaproteobacteria(100)	Burkholderiales(100)	Alcaligenaceae(100)	unclassified(100)
Otu1371	0	0	2	0	0	0	0	0	0	0	0	0	0	0	Actinobacteria(100)	Actinobacteria(100)	Solirubrobacterales(100)	Solirubrobacteraceae(100)	Solirubrobacter(100)
Otu1372	0	0	0	0	0	0	0	0	2	0	0	0	0	0	unclassified(100)	unclassified(100)	unclassified(100)	unclassified(100)	unclassified(100)
Otu1373	0	1	0	0	0	0	1	0	0	0	0	0	0	0	Proteobacteria(100)	Gammaproteobacteria(100)	Xanthomonadales(100)	Xanthomonadaceae(100)	unclassified
Otu1374	0	0	0	0	0	0	0	0	0	0	0	0	0	2	unclassified(100)	unclassified(100)	unclassified(100)	unclassified(100)	unclassified(100)
Otu1375	0	0	1	0	0	0	0	0	0	0	0	0	0	0	unclassified(100)	unclassified(100)	unclassified(100)	unclassified(100)	unclassified(100)
Otu1376	0	0	0	0	0	0	0	0	0	0	0	1	0	0	Proteobacteria(100)	Alphaproteobacteria(100)	Rhizobiales(100)	Bradyrhizobiaceae(100)	unclassified(100)
Otu1377	0	0	0	0	0	0	0	0	0	0	0	0	2	0	unclassified(100)	unclassified(100)	unclassified(100)	unclassified(100)	unclassified(100)
Otu1378	0	0	2	0	0	0	0	0	0	0	0	0	0	0	Proteobacteria(100)	Alphaproteobacteria(100)	Rhizobiales(100)	unclassified(100)	unclassified(100)
Otu1379	0	0	2	0	0	0	0	0	0	0	0	0	0	0	Deinococcus-Thermus(100)	Deinococci(100)	Deinococcales(100)	Deinococcaceae(100)	unclassified(100)
Otu1380	0	0	2	0	0	0	0	0	0	0	0	0	0	0	Proteobacteria(100)	unclassified(100)	unclassified(100)	unclassified(100)	unclassified(100)
Otu1381	0	0	2	0	0	0	0	0	0	0	0	0	0	0	unclassified(100)	unclassified(100)	unclassified(100)	unclassified(100)	unclassified(100)
Otu1382	0	0	0	0	0	0	2	0	0	0	0	0	0	0	unclassified(100)	unclassified(100)	unclassified(100)	unclassified(100)	unclassified(100)
Otu1383	0	0	1	0	0	0	0	0	0	0	0	0	0	0	Actinobacteria(100)	Actinobacteria(100)	unclassified(100)	unclassified(100)	unclassified(100)
Otu1384	0	0	2	0	0	0	0	0	0	0	0	0	0	0	unclassified(100)	unclassified(100)	unclassified(100)	unclassified(100)	unclassified(100)
Otu1385	0	0	0	0	0	0	0	0	1	0	0	0	0	0	Firmicutes(100)	Bacilli(100)	Bacillales(100)	unclassified	unclassified
Otu1386	0	0	0	0	0	0	0	1	1	0	0	0	0	0	Proteobacteria(100)	Betaproteobacteria(100)	Burkholderiales(100)	unclassified(100)	unclassified(100)
Otu1387	0	0	0	0	0	0	0	0	0	0	0	0	2	0	Proteobacteria(100)	Gammaproteobacteria(100)	Xanthomonadales(100)	Xanthomonadaceae(100)	unclassified(100)
Otu1388	0	0	0	0	0	0	0	0	0	1	0	0	0	0	unclassified(100)	unclassified(100)	unclassified(100)	unclassified(100)	unclassified(100)
Otu1389	0	0	0	0	0	0	0	0	0	0	0	0	2	0	Bacteroidetes(100)	Sphingobacteria(100)	Sphingobacteriales(100)	unclassified(100)	unclassified(100)
Otu1390	0	0	1	0	0	0	0	0	0	0	0	0	0	0	unclassified(100)	unclassified(100)	unclassified(100)	unclassified(100)	unclassified(100)
Otu1391	0	0	0	0	1	0	0	0	1	0	0	0	0	0	Firmicutes(100)	Bacilli(100)	Bacillales(100)	unclassified(100)	unclassified(100)
Otu1392	0	0	0	0	0	0	0	0	0	0	0	2	0	0	Proteobacteria(100)	Alphaproteobacteria(100)	unclassified(100)	unclassified(100)	unclassified(100)
Otu1394	0	0	0	0	0	0	2	0	0	0	0	0	0	0	unclassified(100)	unclassified(100)	unclassified(100)	unclassified(100)	unclassified(100)
Otu1395	0	0	1	0	0	0	0	0	0	0	0	0	0	0	unclassified(100)	unclassified(100)	unclassified(100)	unclassified(100)	unclassified(100)
Otu1396	0	0	2	0	0	0	0	0	0	0	0	0	0	0	unclassified(100)	unclassified(100)	unclassified(100)	unclassified(100)	unclassified(100)
Otu1397	0	0	0	0	0	0	0	0	0	0	0	0	2	0	Proteobacteria(100)	unclassified(100)	unclassified(100)	unclassified(100)	unclassified(100)
Otu1398	1	0	0	0	0	0	0	0	0	0	0	0	0	0	unclassified(100)	unclassified(100)	unclassified(100)	unclassified(100)	unclassified(100)
Otu1399	0	0	0	0	0	0	0	0	0	1	0	0	0	0	Proteobacteria(100)	Gammaproteobacteria(100)	Enterobacteriales(100)	Enterobacteriaceae(100)	unclassified(100)
Otu1400	0	0	1	0	1	0	0	0	0	0	0	0	0	0	unclassified(100)	unclassified(100)	unclassified(100)	unclassified(100)	unclassified(100)
Otu1401	0	0	1	0	0	0	0	0	0	0	0	0	0	0	unclassified(100)	unclassified(100)	unclassified(100)	unclassified(100)	unclassified(100)
Otu1403	0	0	0	0	0	0	0	0	0	0	0	1	0	0	Actinobacteria(100)	Actinobacteria(100)	Actinomycetales(100)	Micromonosporaceae(100)	unclassified(100)
Otu1404	0	0	0	0	0	0	0	0	0	0	0	0	2	0	Proteobacteria(100)	Betaproteobacteria(100)	Burkholderiales(100)	unclassified(100)	unclassified(100)
Otu1406	0	0	2	0	0	0	0	0	0	0	0	0	0	0	Verrucomicrobia(100)	Subdivision3(100)	Subdivision3_order_incertae_sedis(100)	Subdivision3_family_incertae_sedis(100)	3_genus_incertae_sedis(100)
Otu1408	0	0	2	0	0	0	0	0	0	0	0	0	0	0	Proteobacteria(100)	Betaproteobacteria(100)	unclassified(100)	unclassified(100)	unclassified(100)
Otu1409	0	0	2	0	0	0	0	0	0	0	0	0	0	0	Proteobacteria(100)	Betaproteobacteria(100)	Burkholderiales(100)	unclassified(100)	unclassified(100)
Otu1410	0	0	0	0	0	1	0	0	1	0	0	0	0	0	Proteobacteria(100)	Betaproteobacteria(100)	unclassified	unclassified	unclassified
Otu1411	0	0	2	0	0	0	0	0	0	0	0	0	0	0	Proteobacteria(100)	Alphaproteobacteria(100)	Rhizobiales(100)	unclassified(100)	unclassified(100)
Otu1413	0	0	0	0	0	0	0	0	0	0	0	1	0	0	unclassified(100)	unclassified(100)	unclassified(100)	unclassified(100)	unclassified(100)
Otu1414	2	0	0	0	0	0	0	0	0	0	0	0	0	0	Proteobacteria(100)	unclassified(100)	unclassified(100)	unclassified(100)	unclassified(100)
Otu1415	0	0	0	0	0	0	0	0	0	0	0	0	0	1	Proteobacteria(100)	unclassified(100)	unclassified(100)	unclassified(100)	unclassified(100)
Otu1416	0	0	1	0	0	0	0	0	0	0	0	0	0	0	Proteobacteria(100)	Alphaproteobacteria(100)	unclassified(100)	unclassified(100)	unclassified(100)
Otu1417	0	0	0	0	0	0	0	0	0	0	0	0	2	0	Proteobacteria(100)	Alphaproteobacteria(100)	unclassified(100)	unclassified(100)	unclassified(100)
Otu1418	0	1	0	0	0	0	0	0	0	0	0	0	0	0	Acidobacteria(100)	Acidobacteria_Gp3(100)	unclassified(100)	unclassified(100)	unclassified(100)
Otu1419	0	0	0	0	0	0	0	0	0	0	0	2	0	0	Proteobacteria(100)	Gammaproteobacteria(100)	Xanthomonadales(100)	Xanthomonadaceae(100)	unclassified(100)
Otu1421	0	0	0	0	0	0	0	0	0	0	0	0	1	0	Proteobacteria(100)	Alphaproteobacteria(100)	Rhizobiales(100)	Xanthobacteraceae(100)	Pseudolabrys(100)
Otu1422	1	0	0	0	1	0	0	0	0	0	0	0	0	0	Actinobacteria(100)	Actinobacteria(100)	Actinomycetales(100)	Nocardioidaceae(100)	Nocardioides(100)
Otu1423	2	0	0	0	0	0	0	0	0	0	0	0	0	0	Actinobacteria(100)	Actinobacteria(100)	Actinomycetales(100)	unclassified(100)	unclassified(100)
Otu1424	2	0	0	0	0	0	0	0	0	0	0	0	0	0	Bacteroidetes(100)	unclassified(100)	unclassified(100)	unclassified(100)	unclassified(100)
Otu1425	0	0	0	0	0	0	0	0	0	0	0	1	0	0	Proteobacteria(100)	Betaproteobacteria(100)	unclassified(100)	unclassified(100)	unclassified(100)
Otu1426	0	0	0	0	0	0	0	1	0	0	0	0	0	0	Proteobacteria(100)	Deltaproteobacteria(100)	Myxococcales(100)	Cystobacteraceae(100)	unclassified(100)
Otu1427	0	0	0	0	0	0	0	0	0	0	0	2	0	0	Actinobacteria(100)	Actinobacteria(100)	Actinomycetales(100)	unclassified(100)	unclassified(100)
Otu1428	0	0	0	0	0	0	0	1	0	0	0	0	0	0	Proteobacteria(100)	unclassified(100)	unclassified(100)	unclassified(100)	unclassified(100)
Otu1430	2	0	0	0	0	0	0	0	0	0	0	0	0	0	unclassified(100)	unclassified(100)	unclassified(100)	unclassified(100)	unclassified(100)
Otu1431	2	0	0	0	0	0	0	0	0	0	0	0	0	0	Acidobacteria(100)	Acidobacteria_Gp3(100)	unclassified(100)	unclassified(100)	unclassified(100)
Otu1432	2	0	0	0	0	0	0	0	0	0	0	0	0	0	Firmicutes(100)	Clostridia(100)	Clostridiales(100)	Gracilibacteraceae(100)	unclassified(100)
Otu1435	2	0	0	0	0	0	0	0	0	0	0	0	0	0	Proteobacteria(100)	Betaproteobacteria(100)	unclassified(100)	unclassified(100)	unclassified(100)
Otu1436	0	0	1	0	0	0	0	0	0	0	0	0	0	0	Proteobacteria(100)	unclassified(100)	unclassified(100)	unclassified(100)	unclassified(100)
Otu1437	0	0	0	0	0	0	0	0	0	0	0	0	2	0	Bacteroidetes(100)	Sphingobacteria(100)	Sphingobacteriales(100)	Chitinophagaceae(100)	unclassified(100)
Otu1438	0	0	0	0	0	0	0	0	0	0	0	0	2	0	Proteobacteria(100)	Betaproteobacteria(100)	Burkholderiales(100)	unclassified(100)	unclassified(100)
Otu1439	1	0	0	0	0	0	0	0	0	0	0	0	0	0	Proteobacteria(100)	Alphaproteobacteria(100)	unclassified(100)	unclassified(100)	unclassified(100)
Otu1440	0	1	0	0	0	0	0	0	0	0	0	0	0	0	Proteobacteria(100)	Betaproteobacteria(100)	Burkholderiales(100)	unclassified(100)	unclassified(100)
Otu1441	0	0	1	0	0	0	0	0	0	0	0	0	0	0	Proteobacteria(100)	unclassified(100)	unclassified(100)	unclassified(100)	unclassified(100)
Otu1442	1	0	0	0	1	0	0	0	0	0	0	0	0	0	unclassified(100)	unclassified(100)	unclassified(100)	unclassified(100)	unclassified(100)
Otu1443	0	0	0	0	0	0	0	0	0	0	0	0	2	0	Proteobacteria(100)	Alphaproteobacteria(100)	Rhizobiales(100)	unclassified(100)	unclassified(100)
Otu1444	0	0	2	0	0	0	0	0	0	0	0	0	0	0	Proteobacteria(100)	unclassified(100)	unclassified(100)	unclassified(100)	unclassified(100)
Otu1445	2	0	0	0	0	0	0	0	0	0	0	0	0	0	unclassified(100)	unclassified(100)	unclassified(100)	unclassified(100)	unclassified(100)
Otu1446	0	0	0	0	0	0	0	0	0	0	0	0	0	1	Firmicutes(100)	Clostridia(100)	Clostridiales(100)	Peptococcaceae_1(100)	unclassified(100)
Otu1447	0	0	0	0	0	0	0	0	0	0	0	1	0	0	Proteobacteria(100)	Betaproteobacteria(100)	unclassified(100)	unclassified(100)	unclassified(100)
Otu1448	2	0	0	0	0	0	0	0	0	0	0	0	0	0	unclassified(100)	unclassified(100)	unclassified(100)	unclassified(100)	unclassified(100)
Otu1449	0	0	0	0	0	0	0	0	0	0	0	0	0	1	Proteobacteria(100)	Alphaproteobacteria(100)	Rhizobiales(100)	unclassified(100)	unclassified(100)
Otu1451	0	0	0	0	0	0	0	0	0	0	0	0	2	0	Proteobacteria(100)	Alphaproteobacteria(100)	Rhizobiales(100)	unclassified(100)	unclassified(100)
Otu1454	0	0	0	0	0	0	0	0	0	0	0	0	2	0	Proteobacteria(100)	Betaproteobacteria(100)	unclassified(100)	unclassified(100)	unclassified(100)
Otu1455	2	0	0	0	0	0	0	0	0	0	0	0	0	0	unclassified(100)	unclassified(100)	unclassified(100)	unclassified(100)	unclassified(100)
Otu1457	0	0	2	0	0	0	0	0	0	0	0	0	0	0	Proteobacteria(100)	Alphaproteobacteria(100)	Rhodospirillales(100)	Acetobacteraceae(100)	unclassified(100)
Otu1458	0	0	0	1	0	0	0	0	0	0	0	0	0	0	Actinobacteria(100)	Actinobacteria(100)	unclassified(100)	unclassified(100)	unclassified(100)
Otu1459	0	0	2	0	0	0	0	0	0	0	0	0	0	0	Actinobacteria(100)	Actinobacteria(100)	unclassified(100)	unclassified(100)	unclassified(100)
Otu1460	0	0	0	0	0	0	0	0	0	0	0	1	0	0	Proteobacteria(100)	Gammaproteobacteria(100)	Legionellales(100)	Coxiellaceae(100)	Aquicella(100)
Otu1461	0	0	2	0	0	0	0	0	0	0	0	0	0	0	Proteobacteria(100)	unclassified(100)	unclassified(100)	unclassified(100)	unclassified(100)
Otu1463	0	0	0	0	0	0	0	0	0	0	0	0	0	1	Proteobacteria(100)	Alphaproteobacteria(100)	Rhizobiales(100)	Brucellaceae(100)	Crabtreella(100)
Otu1464	0	0	0	0	0	1	0	0	0	0	0	0	0	0	Proteobacteria(100)	Betaproteobacteria(100)	unclassified(100)	unclassified(100)	unclassified(100)
Otu1465	0	0	0	0	0	0	0	0	0	0	0	0	1	0	Proteobacteria(100)	unclassified(100)	unclassified(100)	unclassified(100)	unclassified(100)
Otu1466	0	0	0	0	0	0	0	0	0	0	0	0	0	1	unclassified(100)	unclassified(100)	unclassified(100)	unclassified(100)	unclassified(100)
Otu1467	0	0	0	0	0	0	0	0	0	0	1	0	0	0	Proteobacteria(100)	Gammaproteobacteria(100)	Xanthomonadales(100)	Xanthomonadaceae(100)	unclassified(100)
Otu1470	0	0	0	0	0	0	0	0	0	1	0	0	0	0	Proteobacteria(100)	unclassified(100)	unclassified(100)	unclassified(100)	unclassified(100)
Otu1472	0	0	0	0	0	0	0	0	0	0	0	0	0	1	unclassified(100)	unclassified(100)	unclassified(100)	unclassified(100)	unclassified(100)
Otu1473	0	0	0	0	0	0	0	0	0	1	0	0	0	0	Actinobacteria(100)	Actinobacteria(100)	Actinomycetales(100)	Streptosporangiaceae(100)	unclassified(100)
Otu1474	0	0	0	0	0	0	0	0	0	0	0	0	0	1	unclassified(100)	unclassified(100)	unclassified(100)	unclassified(100)	unclassified(100)
Otu1476	0	0	0	0	0	0	0	0	0	0	1	0	0	0	Proteobacteria(100)	Alphaproteobacteria(100)	Rhizobiales(100)	unclassified(100)	unclassified(100)
Otu1477	0	0	0	0	0	0	0	0	0	0	0	0	1	0	Proteobacteria(100)	Alphaproteobacteria(100)	Rhizobiales(100)	Rhizobiaceae(100)	Ensifer(100)
Otu1478	0	0	0	0	0	0	0	0	0	0	0	0	1	0	Bacteroidetes(100)	Sphingobacteria(100)	Sphingobacteriales(100)	Chitinophagaceae(100)	Chitinophaga(100)
Otu1480	0	0	0	0	0	0	0	0	0	0	0	0	0	1	Actinobacteria(100)	Actinobacteria(100)	Actinomycetales(100)	Intrasporangiaceae(100)	Terrabacter(100)
Otu1481	0	0	0	1	0	0	0	0	0	0	0	0	0	0	Actinobacteria(100)	Actinobacteria(100)	Solirubrobacterales(100)	Solirubrobacteraceae(100)	Solirubrobacter(100)
Otu1482	0	0	0	0	0	0	0	0	0	1	0	0	0	0	Proteobacteria(100)	Alphaproteobacteria(100)	Rhizobiales(100)	Bradyrhizobiaceae(100)	unclassified(100)
Otu1483	0	0	0	0	0	1	0	0	0	0	0	0	0	0	Proteobacteria(100)	Alphaproteobacteria(100)	Rhodospirillales(100)	Rhodospirillaceae(100)	unclassified(100)
Otu1485	0	0	0	0	0	0	0	0	0	1	0	0	0	0	Proteobacteria(100)	Gammaproteobacteria(100)	Xanthomonadales(100)	Xanthomonadaceae(100)	unclassified(100)
Otu1486	0	0	0	0	0	0	0	0	0	1	0	0	0	0	Proteobacteria(100)	Betaproteobacteria(100)	unclassified(100)	unclassified(100)	unclassified(100)
Otu1487	0	0	0	1	0	0	0	0	0	0	0	0	0	0	Proteobacteria(100)	Alphaproteobacteria(100)	Caulobacterales(100)	Caulobacteraceae(100)	unclassified(100)
Otu1488	0	0	0	0	0	0	0	0	0	1	0	0	0	0	Proteobacteria(100)	Gammaproteobacteria(100)	Xanthomonadales(100)	Xanthomonadaceae(100)	unclassified(100)
Otu1489	0	0	0	0	0	1	0	0	0	0	0	0	0	0	unclassified(100)	unclassified(100)	unclassified(100)	unclassified(100)	unclassified(100)
Otu1490	0	0	0	0	0	1	0	0	0	0	0	0	0	0	Firmicutes(100)	Bacilli(100)	Bacillales(100)	Alicyclobacillaceae(100)	unclassified(100)
Otu1491	0	0	0	0	0	0	0	0	0	0	1	0	0	0	Proteobacteria(100)	Gammaproteobacteria(100)	Xanthomonadales(100)	Xanthomonadaceae(100)	unclassified(100)
Otu1494	0	0	0	0	0	0	0	0	0	1	0	0	0	0	Proteobacteria(100)	Betaproteobacteria(100)	Burkholderiales(100)	unclassified(100)	unclassified(100)
Otu1495	0	0	0	0	0	0	0	0	0	0	0	0	0	1	Proteobacteria(100)	Alphaproteobacteria(100)	Rhizobiales(100)	unclassified(100)	unclassified(100)
Otu1496	0	0	0	0	0	0	0	0	0	0	0	0	0	1	Proteobacteria(100)	unclassified(100)	unclassified(100)	unclassified(100)	unclassified(100)
Otu1497	0	0	0	0	0	1	0	0	0	0	0	0	0	0	Proteobacteria(100)	Alphaproteobacteria(100)	Sphingomonadales(100)	Sphingomonadaceae(100)	unclassified(100)
Otu1498	0	0	0	0	0	0	0	0	0	0	0	0	1	0	Proteobacteria(100)	Gammaproteobacteria(100)	Xanthomonadales(100)	Xanthomonadaceae(100)	unclassified(100)
Otu1501	0	0	0	0	0	1	0	0	0	0	0	0	0	0	unclassified(100)	unclassified(100)	unclassified(100)	unclassified(100)	unclassified(100)
Otu1503	0	0	0	0	0	0	0	0	0	1	0	0	0	0	Proteobacteria(100)	unclassified(100)	unclassified(100)	unclassified(100)	unclassified(100)
Otu1505	0	0	0	0	0	0	0	0	0	0	0	0	1	0	Actinobacteria(100)	Actinobacteria(100)	Actinomycetales(100)	Micromonosporaceae(100)	Dactylosporangium(100)
Otu1508	0	0	0	0	0	1	0	0	0	0	0	0	0	0	unclassified(100)	unclassified(100)	unclassified(100)	unclassified(100)	unclassified(100)
Otu1509	0	0	0	0	0	0	0	0	0	1	0	0	0	0	Firmicutes(100)	Clostridia(100)	Clostridiales(100)	unclassified(100)	unclassified(100)
Otu1510	0	0	0	0	0	0	0	0	0	1	0	0	0	0	Proteobacteria(100)	Alphaproteobacteria(100)	unclassified(100)	unclassified(100)	unclassified(100)
Otu1511	0	0	0	0	0	0	0	0	0	1	0	0	0	0	Proteobacteria(100)	Alphaproteobacteria(100)	Rhizobiales(100)	unclassified(100)	unclassified(100)
Otu1513	0	0	0	0	0	1	0	0	0	0	0	0	0	0	Proteobacteria(100)	unclassified(100)	unclassified(100)	unclassified(100)	unclassified(100)
Otu1516	0	0	0	0	0	0	0	0	0	0	0	0	0	1	unclassified(100)	unclassified(100)	unclassified(100)	unclassified(100)	unclassified(100)
Otu1517	0	0	0	0	0	1	0	0	0	0	0	0	0	0	Proteobacteria(100)	Betaproteobacteria(100)	Burkholderiales(100)	Oxalobacteraceae(100)	unclassified(100)
Otu1520	0	0	0	0	0	1	0	0	0	0	0	0	0	0	Proteobacteria(100)	Alphaproteobacteria(100)	Sphingomonadales(100)	Sphingomonadaceae(100)	unclassified(100)
Otu1521	0	0	0	0	0	0	0	0	0	0	0	0	0	1	Actinobacteria(100)	Actinobacteria(100)	Actinomycetales(100)	Thermomonosporaceae(100)	unclassified(100)
Otu1523	0	0	0	0	0	0	0	0	0	0	0	0	1	0	Proteobacteria(100)	Betaproteobacteria(100)	Burkholderiales(100)	unclassified(100)	unclassified(100)
Otu1524	0	0	0	0	0	0	0	0	0	0	0	0	0	1	Proteobacteria(100)	Betaproteobacteria(100)	Burkholderiales(100)	unclassified(100)	unclassified(100)
Otu1525	0	0	0	0	0	1	0	0	0	0	0	0	0	0	Proteobacteria(100)	Alphaproteobacteria(100)	Rhodospirillales(100)	Acetobacteraceae(100)	unclassified(100)
Otu1527	0	0	0	0	0	1	0	0	0	0	0	0	0	0	Proteobacteria(100)	Gammaproteobacteria(100)	Xanthomonadales(100)	Xanthomonadaceae(100)	unclassified(100)
Otu1531	0	0	0	0	0	0	0	0	0	1	0	0	0	0	unclassified(100)	unclassified(100)	unclassified(100)	unclassified(100)	unclassified(100)
Otu1532	0	0	0	0	0	0	0	0	0	0	0	0	1	0	Proteobacteria(100)	unclassified(100)	unclassified(100)	unclassified(100)	unclassified(100)
Otu1533	0	0	0	0	0	0	0	0	0	0	1	0	0	0	Actinobacteria(100)	Actinobacteria(100)	Actinomycetales(100)	Pseudonocardiaceae(100)	unclassified(100)
Otu1536	0	0	0	0	0	0	0	0	0	0	1	0	0	0	Proteobacteria(100)	Betaproteobacteria(100)	unclassified(100)	unclassified(100)	unclassified(100)
Otu1537	0	0	0	1	0	0	0	0	0	0	0	0	0	0	unclassified(100)	unclassified(100)	unclassified(100)	unclassified(100)	unclassified(100)
Otu1539	0	0	0	0	0	0	0	0	0	1	0	0	0	0	Proteobacteria(100)	Betaproteobacteria(100)	Burkholderiales(100)	Oxalobacteraceae(100)	unclassified(100)
Otu1541	0	0	0	0	0	1	0	0	0	0	0	0	0	0	unclassified(100)	unclassified(100)	unclassified(100)	unclassified(100)	unclassified(100)
Otu1543	0	0	0	0	0	0	0	0	0	0	0	0	0	1	Firmicutes(100)	Clostridia(100)	Clostridiales(100)	Lachnospiraceae(100)	unclassified(100)
Otu1544	0	0	0	0	0	0	0	0	0	0	0	0	0	1	Proteobacteria(100)	Betaproteobacteria(100)	Burkholderiales(100)	unclassified(100)	unclassified(100)
Otu1547	0	0	0	0	0	0	0	0	0	1	0	0	0	0	Proteobacteria(100)	unclassified(100)	unclassified(100)	unclassified(100)	unclassified(100)
Otu1548	0	0	0	0	0	0	0	0	0	1	0	0	0	0	Proteobacteria(100)	Betaproteobacteria(100)	unclassified(100)	unclassified(100)	unclassified(100)
Otu1549	0	0	0	0	0	1	0	0	0	0	0	0	0	0	Proteobacteria(100)	Betaproteobacteria(100)	unclassified(100)	unclassified(100)	unclassified(100)
Otu1551	0	0	0	1	0	0	0	0	0	0	0	0	0	0	Proteobacteria(100)	Alphaproteobacteria(100)	Sphingomonadales(100)	Sphingomonadaceae(100)	unclassified(100)
Otu1556	0	0	0	0	0	0	0	0	0	0	0	0	0	1	Actinobacteria(100)	Actinobacteria(100)	Actinomycetales(100)	Pseudonocardiaceae(100)	unclassified(100)
Otu1557	0	0	0	0	0	1	0	0	0	0	0	0	0	0	unclassified(100)	unclassified(100)	unclassified(100)	unclassified(100)	unclassified(100)
Otu1564	0	0	0	0	1	0	0	0	0	0	0	0	0	0	unclassified(100)	unclassified(100)	unclassified(100)	unclassified(100)	unclassified(100)
Otu1566	0	0	0	0	1	0	0	0	0	0	0	0	0	0	unclassified(100)	unclassified(100)	unclassified(100)	unclassified(100)	unclassified(100)
Otu1571	0	0	0	0	1	0	0	0	0	0	0	0	0	0	Proteobacteria(100)	Alphaproteobacteria(100)	Sphingomonadales(100)	unclassified(100)	unclassified(100)
Otu1578	0	0	0	0	1	0	0	0	0	0	0	0	0	0	unclassified(100)	unclassified(100)	unclassified(100)	unclassified(100)	unclassified(100)
Otu1582	0	0	0	0	1	0	0	0	0	0	0	0	0	0	unclassified(100)	unclassified(100)	unclassified(100)	unclassified(100)	unclassified(100)
Otu1583	0	0	0	0	1	0	0	0	0	0	0	0	0	0	Proteobacteria(100)	Alphaproteobacteria(100)	Rhizobiales(100)	unclassified(100)	unclassified(100)
Otu1584	0	0	0	0	1	0	0	0	0	0	0	0	0	0	Proteobacteria(100)	Alphaproteobacteria(100)	Rhizobiales(100)	unclassified(100)	unclassified(100)
Otu1585	0	0	0	0	1	0	0	0	0	0	0	0	0	0	Proteobacteria(100)	Alphaproteobacteria(100)	unclassified(100)	unclassified(100)	unclassified(100)
Otu1586	0	0	0	0	0	0	0	0	0	0	0	0	1	0	Proteobacteria(100)	Alphaproteobacteria(100)	Sphingomonadales(100)	Sphingomonadaceae(100)	Sphingomonas(100)
Otu1588	0	0	0	0	1	0	0	0	0	0	0	0	0	0	unclassified(100)	unclassified(100)	unclassified(100)	unclassified(100)	unclassified(100)
Otu1589	0	0	0	0	0	0	0	0	0	0	0	0	1	0	Proteobacteria(100)	Alphaproteobacteria(100)	Caulobacterales(100)	Caulobacteraceae(100)	unclassified(100)
Otu1594	0	0	0	0	1	0	0	0	0	0	0	0	0	0	Acidobacteria(100)	Acidobacteria_Gp3(100)	Acidobacteria_Gp3_order_incertae_sedis(100)	Acidobacteria_Gp3_family_incertae_sedis(100)	Gp3(100)
Otu1596	0	0	0	0	0	0	0	0	0	0	0	0	1	0	Proteobacteria(100)	Gammaproteobacteria(100)	Xanthomonadales(100)	Xanthomonadaceae(100)	unclassified(100)
Otu1600	0	0	0	0	1	0	0	0	0	0	0	0	0	0	unclassified(100)	unclassified(100)	unclassified(100)	unclassified(100)	unclassified(100)
Otu1601	0	0	0	0	1	0	0	0	0	0	0	0	0	0	unclassified(100)	unclassified(100)	unclassified(100)	unclassified(100)	unclassified(100)
Otu1609	0	0	0	0	1	0	0	0	0	0	0	0	0	0	Proteobacteria(100)	Betaproteobacteria(100)	unclassified(100)	unclassified(100)	unclassified(100)
Otu1615	0	0	0	0	1	0	0	0	0	0	0	0	0	0	Proteobacteria(100)	Gammaproteobacteria(100)	Xanthomonadales(100)	Xanthomonadaceae(100)	unclassified(100)
Otu1616	0	0	0	0	1	0	0	0	0	0	0	0	0	0	unclassified(100)	unclassified(100)	unclassified(100)	unclassified(100)	unclassified(100)
Otu1618	0	0	0	0	1	0	0	0	0	0	0	0	0	0	Proteobacteria(100)	Alphaproteobacteria(100)	unclassified(100)	unclassified(100)	unclassified(100)
Otu1620	0	0	0	0	1	0	0	0	0	0	0	0	0	0	Proteobacteria(100)	Betaproteobacteria(100)	unclassified(100)	unclassified(100)	unclassified(100)
Otu1621	0	0	0	0	1	0	0	0	0	0	0	0	0	0	Acidobacteria(100)	Acidobacteria_Gp3(100)	Acidobacteria_Gp3_order_incetae_sedis(100)	Acidobacteria_Gp3_family_incetae_sedis(100)	Bryobacter(100)
Otu1623	0	0	0	0	1	0	0	0	0	0	0	0	0	0	unclassified(100)	unclassified(100)	unclassified(100)	unclassified(100)	unclassified(100)
Otu1631	0	0	0	0	1	0	0	0	0	0	0	0	0	0	Proteobacteria(100)	Betaproteobacteria(100)	unclassified(100)	unclassified(100)	unclassified(100)
Otu1633	0	0	0	0	1	0	0	0	0	0	0	0	0	0	Proteobacteria(100)	Gammaproteobacteria(100)	Legionellales(100)	Coxiellaceae(100)	Aquicella(100)
Otu1635	0	0	0	0	1	0	0	0	0	0	0	0	0	0	Proteobacteria(100)	Alphaproteobacteria(100)	Rhizobiales(100)	Bradyrhizobiaceae(100)	Bradyrhizobium(100)
Otu1637	0	0	0	0	1	0	0	0	0	0	0	0	0	0	unclassified(100)	unclassified(100)	unclassified(100)	unclassified(100)	unclassified(100)
Otu1639	0	0	0	0	1	0	0	0	0	0	0	0	0	0	unclassified(100)	unclassified(100)	unclassified(100)	unclassified(100)	unclassified(100)
Otu1640	0	0	0	0	1	0	0	0	0	0	0	0	0	0	Proteobacteria(100)	Alphaproteobacteria(100)	Rhodospirillales(100)	Rhodospirillaceae(100)	unclassified(100)
Otu1643	0	0	0	0	1	0	0	0	0	0	0	0	0	0	Bacteroidetes(100)	Sphingobacteria(100)	Sphingobacteriales(100)	unclassified(100)	unclassified(100)
Otu1644	0	0	0	0	1	0	0	0	0	0	0	0	0	0	Acidobacteria(100)	Acidobacteria_Gp3(100)	Acidobacteria_Gp3_order_incetae_sedis(100)	Acidobacteria_Gp3_family_incetae_sedis(100)	Bryobacter(100)
Otu1647	0	0	0	0	1	0	0	0	0	0	0	0	0	0	Proteobacteria(100)	Alphaproteobacteria(100)	Rhizobiales(100)	unclassified(100)	unclassified(100)
Otu1650	0	0	0	0	1	0	0	0	0	0	0	0	0	0	unclassified(100)	unclassified(100)	unclassified(100)	unclassified(100)	unclassified(100)
Otu1651	0	0	0	0	1	0	0	0	0	0	0	0	0	0	Actinobacteria(100)	Actinobacteria(100)	Actinomycetales(100)	unclassified(100)	unclassified(100)
Otu1652	0	0	0	0	0	0	0	0	0	1	0	0	0	0	Proteobacteria(100)	Betaproteobacteria(100)	Burkholderiales(100)	Alcaligenaceae(100)	unclassified(100)
Otu1653	0	0	0	0	0	0	0	0	0	0	0	0	0	1	Bacteroidetes(100)	Sphingobacteria(100)	Sphingobacteriales(100)	Chitinophagaceae(100)	unclassified(100)
Otu1657	0	0	0	0	0	0	0	0	0	0	0	0	0	1	Proteobacteria(100)	Betaproteobacteria(100)	Burkholderiales(100)	unclassified(100)	unclassified(100)
Otu1658	0	0	0	0	0	0	0	0	0	0	0	0	0	1	Proteobacteria(100)	Deltaproteobacteria(100)	Myxococcales(100)	unclassified(100)	unclassified(100)
Otu1659	0	0	0	0	0	0	0	0	0	1	0	0	0	0	Proteobacteria(100)	Gammaproteobacteria(100)	Xanthomonadales(100)	Xanthomonadaceae(100)	Stenotrophomonas(100)
Otu1660	0	0	0	0	0	0	0	0	0	1	0	0	0	0	Proteobacteria(100)	Betaproteobacteria(100)	Burkholderiales(100)	unclassified(100)	unclassified(100)
Otu1661	0	0	0	0	1	0	0	0	0	0	0	0	0	0	Actinobacteria(100)	Actinobacteria(100)	Solirubrobacterales(100)	Solirubrobacteraceae(100)	Solirubrobacter(100)
Otu1663	0	0	0	0	1	0	0	0	0	0	0	0	0	0	Acidobacteria(100)	Acidobacteria_Gp3(100)	unclassified(100)	unclassified(100)	unclassified(100)
Otu1666	0	0	0	0	1	0	0	0	0	0	0	0	0	0	Proteobacteria(100)	Deltaproteobacteria(100)	Myxococcales(100)	Polyangiaceae(100)	unclassified(100)
Otu1667	0	0	0	0	1	0	0	0	0	0	0	0	0	0	Firmicutes(100)	Bacilli(100)	Bacillales(100)	unclassified(100)	unclassified(100)
Otu1669	0	0	0	0	1	0	0	0	0	0	0	0	0	0	Proteobacteria(100)	Alphaproteobacteria(100)	Rhodospirillales(100)	Acetobacteraceae(100)	unclassified(100)
Otu1670	0	0	0	0	1	0	0	0	0	0	0	0	0	0	unclassified(100)	unclassified(100)	unclassified(100)	unclassified(100)	unclassified(100)
Otu1671	0	0	0	0	1	0	0	0	0	0	0	0	0	0	Proteobacteria(100)	Betaproteobacteria(100)	unclassified(100)	unclassified(100)	unclassified(100)
Otu1673	0	0	0	0	1	0	0	0	0	0	0	0	0	0	unclassified(100)	unclassified(100)	unclassified(100)	unclassified(100)	unclassified(100)
Otu1674	0	0	0	0	0	0	0	0	0	0	1	0	0	0	unclassified(100)	unclassified(100)	unclassified(100)	unclassified(100)	unclassified(100)
Otu1675	0	0	0	0	1	0	0	0	0	0	0	0	0	0	Firmicutes(100)	Bacilli(100)	Bacillales(100)	Paenibacillaceae_1(100)	unclassified(100)
Otu1680	0	0	0	0	0	0	0	0	0	1	0	0	0	0	Proteobacteria(100)	Alphaproteobacteria(100)	unclassified(100)	unclassified(100)	unclassified(100)
Otu1682	0	0	0	0	0	0	0	0	0	1	0	0	0	0	Proteobacteria(100)	unclassified(100)	unclassified(100)	unclassified(100)	unclassified(100)
Otu1683	0	0	0	0	0	0	0	0	0	0	0	0	0	1	Bacteroidetes(100)	Sphingobacteria(100)	Sphingobacteriales(100)	Chitinophagaceae(100)	Ferruginibacter(100)
Otu1684	0	0	0	0	0	0	0	0	0	0	0	0	0	1	Proteobacteria(100)	Gammaproteobacteria(100)	Xanthomonadales(100)	Xanthomonadaceae(100)	unclassified(100)
Otu1685	0	0	0	0	0	0	0	0	0	0	1	0	0	0	Actinobacteria(100)	Actinobacteria(100)	Actinomycetales(100)	unclassified(100)	unclassified(100)
Otu1686	0	0	0	0	0	0	0	0	0	0	0	0	0	1	Proteobacteria(100)	Alphaproteobacteria(100)	Rhizobiales(100)	unclassified(100)	unclassified(100)
Otu1687	0	0	0	0	0	0	0	0	0	0	0	0	0	1	Proteobacteria(100)	Betaproteobacteria(100)	Burkholderiales(100)	Oxalobacteraceae(100)	unclassified(100)
Otu1689	0	0	0	0	0	0	0	0	0	1	0	0	0	0	Proteobacteria(100)	Betaproteobacteria(100)	Burkholderiales(100)	Comamonadaceae(100)	unclassified(100)
Otu1691	0	0	0	0	0	0	0	0	0	0	1	0	0	0	Actinobacteria(100)	Actinobacteria(100)	Actinomycetales(100)	Cryptosporangiaceae(100)	Cryptosporangium(100)
Otu1692	0	0	0	0	0	0	0	0	0	1	0	0	0	0	unclassified(100)	unclassified(100)	unclassified(100)	unclassified(100)	unclassified(100)
Otu1694	0	0	0	0	0	0	0	0	0	0	0	0	0	1	unclassified(100)	unclassified(100)	unclassified(100)	unclassified(100)	unclassified(100)
Otu1696	0	0	0	0	0	0	0	0	0	1	0	0	0	0	Proteobacteria(100)	Alphaproteobacteria(100)	Rhizobiales(100)	Phyllobacteriaceae(100)	Mesorhizobium(100)
Otu1697	0	0	0	0	0	0	0	0	0	0	0	0	0	1	Proteobacteria(100)	Alphaproteobacteria(100)	Rhodospirillales(100)	Rhodospirillaceae(100)	Azospirillum(100)
Otu1698	0	0	0	0	0	0	0	0	0	0	0	0	0	1	unclassified(100)	unclassified(100)	unclassified(100)	unclassified(100)	unclassified(100)
Otu1700	0	0	0	0	1	0	0	0	0	0	0	0	0	0	Proteobacteria(100)	Betaproteobacteria(100)	unclassified(100)	unclassified(100)	unclassified(100)
Otu1701	0	0	0	0	1	0	0	0	0	0	0	0	0	0	Proteobacteria(100)	Alphaproteobacteria(100)	Rhizobiales(100)	Hyphomicrobiaceae(100)	Devosia(100)
Otu1703	0	0	0	0	1	0	0	0	0	0	0	0	0	0	unclassified(100)	unclassified(100)	unclassified(100)	unclassified(100)	unclassified(100)
Otu1708	0	0	0	0	1	0	0	0	0	0	0	0	0	0	Bacteroidetes(100)	Sphingobacteria(100)	Sphingobacteriales(100)	unclassified(100)	unclassified(100)
Otu1709	0	0	0	0	1	0	0	0	0	0	0	0	0	0	unclassified(100)	unclassified(100)	unclassified(100)	unclassified(100)	unclassified(100)
Otu1712	0	0	0	0	1	0	0	0	0	0	0	0	0	0	Firmicutes(100)	Bacilli(100)	Bacillales(100)	Bacillaceae_1(100)	Bacillus(100)
Otu1713	0	0	0	0	1	0	0	0	0	0	0	0	0	0	Actinobacteria(100)	Actinobacteria(100)	Actinomycetales(100)	unclassified(100)	unclassified(100)
Otu1714	0	0	0	0	1	0	0	0	0	0	0	0	0	0	Firmicutes(100)	Bacilli(100)	Bacillales(100)	unclassified(100)	unclassified(100)
Otu1715	0	0	0	0	1	0	0	0	0	0	0	0	0	0	Proteobacteria(100)	Alphaproteobacteria(100)	Rhodospirillales(100)	Acetobacteraceae(100)	unclassified(100)
Otu1719	0	0	0	0	1	0	0	0	0	0	0	0	0	0	Proteobacteria(100)	unclassified(100)	unclassified(100)	unclassified(100)	unclassified(100)
Otu1721	0	0	0	0	1	0	0	0	0	0	0	0	0	0	Proteobacteria(100)	Deltaproteobacteria(100)	Myxococcales(100)	unclassified(100)	unclassified(100)
Otu1722	0	0	0	0	1	0	0	0	0	0	0	0	0	0	Proteobacteria(100)	Gammaproteobacteria(100)	Legionellales(100)	Coxiellaceae(100)	Aquicella(100)
Otu1723	0	0	0	0	1	0	0	0	0	0	0	0	0	0	Actinobacteria(100)	Actinobacteria(100)	Actinomycetales(100)	unclassified(100)	unclassified(100)
Otu1724	0	0	0	0	1	0	0	0	0	0	0	0	0	0	Proteobacteria(100)	Betaproteobacteria(100)	Rhodocyclales(100)	Rhodocyclaceae(100)	unclassified(100)
Otu1725	0	0	0	0	0	0	0	0	0	0	0	0	1	0	unclassified(100)	unclassified(100)	unclassified(100)	unclassified(100)	unclassified(100)
Otu1727	0	0	0	0	0	0	0	0	0	1	0	0	0	0	Proteobacteria(100)	Gammaproteobacteria(100)	unclassified(100)	unclassified(100)	unclassified(100)
Otu1728	0	0	0	0	0	0	0	0	0	1	0	0	0	0	unclassified(100)	unclassified(100)	unclassified(100)	unclassified(100)	unclassified(100)
Otu1732	0	0	0	0	1	0	0	0	0	0	0	0	0	0	unclassified(100)	unclassified(100)	unclassified(100)	unclassified(100)	unclassified(100)
Otu1734	0	0	0	0	0	0	0	0	0	0	0	0	0	1	Actinobacteria(100)	Actinobacteria(100)	Solirubrobacterales(100)	unclassified(100)	unclassified(100)
Otu1735	0	0	0	0	1	0	0	0	0	0	0	0	0	0	Proteobacteria(100)	Betaproteobacteria(100)	unclassified(100)	unclassified(100)	unclassified(100)
Otu1737	0	0	0	0	1	0	0	0	0	0	0	0	0	0	Proteobacteria(100)	Alphaproteobacteria(100)	Sphingomonadales(100)	Sphingomonadaceae(100)	unclassified(100)
Otu1738	0	0	0	0	1	0	0	0	0	0	0	0	0	0	unclassified(100)	unclassified(100)	unclassified(100)	unclassified(100)	unclassified(100)
Otu1739	0	0	0	0	1	0	0	0	0	0	0	0	0	0	Acidobacteria(100)	Acidobacteria_Gp1(100)	Acidobacteria_Gp1_order_incertae_sedis(100)	Acidobacteria_Gp1_family_incertae_sedis(100)	Gp1(100)
Otu1740	0	0	0	0	1	0	0	0	0	0	0	0	0	0	unclassified(100)	unclassified(100)	unclassified(100)	unclassified(100)	unclassified(100)
Otu1741	0	0	0	0	1	0	0	0	0	0	0	0	0	0	unclassified(100)	unclassified(100)	unclassified(100)	unclassified(100)	unclassified(100)
Otu1742	0	0	0	0	1	0	0	0	0	0	0	0	0	0	Actinobacteria(100)	Actinobacteria(100)	Actinomycetales(100)	Micromonosporaceae(100)	Actinoplanes(100)
Otu1743	0	0	0	0	1	0	0	0	0	0	0	0	0	0	Acidobacteria(100)	Acidobacteria_Gp10(100)	Acidobacteria_Gp10_order_incertae_sedis(100)	Acidobacteria_Gp10_family_incertae_sedis(100)	Gp10(100)
Otu1745	0	1	0	0	0	0	0	0	0	0	0	0	0	0	unclassified(100)	unclassified(100)	unclassified(100)	unclassified(100)	unclassified(100)
Otu1746	0	1	0	0	0	0	0	0	0	0	0	0	0	0	unclassified(100)	unclassified(100)	unclassified(100)	unclassified(100)	unclassified(100)
Otu1748	0	0	0	0	0	0	0	1	0	0	0	0	0	0	unclassified(100)	unclassified(100)	unclassified(100)	unclassified(100)	unclassified(100)
Otu1750	0	0	0	0	0	0	0	0	0	0	0	1	0	0	Proteobacteria(100)	Gammaproteobacteria(100)	Xanthomonadales(100)	Xanthomonadaceae(100)	Frateuria(100)
Otu1754	0	1	0	0	0	0	0	0	0	0	0	0	0	0	Proteobacteria(100)	Betaproteobacteria(100)	Burkholderiales(100)	unclassified(100)	unclassified(100)
Otu1755	0	1	0	0	0	0	0	0	0	0	0	0	0	0	unclassified(100)	unclassified(100)	unclassified(100)	unclassified(100)	unclassified(100)
Otu1756	0	1	0	0	0	0	0	0	0	0	0	0	0	0	Actinobacteria(100)	Actinobacteria(100)	Actinomycetales(100)	Cryptosporangiaceae(100)	Cryptosporangium(100)
Otu1759	0	0	0	0	0	0	0	1	0	0	0	0	0	0	Proteobacteria(100)	Betaproteobacteria(100)	Burkholderiales(100)	unclassified(100)	unclassified(100)
Otu1760	0	0	0	0	0	0	0	0	0	0	0	1	0	0	Proteobacteria(100)	Gammaproteobacteria(100)	Xanthomonadales(100)	Xanthomonadaceae(100)	unclassified(100)
Otu1761	0	0	0	0	0	0	0	1	0	0	0	0	0	0	Proteobacteria(100)	unclassified(100)	unclassified(100)	unclassified(100)	unclassified(100)
Otu1762	0	0	0	0	0	0	0	1	0	0	0	0	0	0	Proteobacteria(100)	Betaproteobacteria(100)	Burkholderiales(100)	Oxalobacteraceae(100)	unclassified(100)
Otu1765	0	0	0	0	0	0	0	0	0	0	0	1	0	0	Proteobacteria(100)	unclassified(100)	unclassified(100)	unclassified(100)	unclassified(100)
Otu1769	0	0	0	0	0	0	0	0	0	0	0	1	0	0	Proteobacteria(100)	Betaproteobacteria(100)	unclassified(100)	unclassified(100)	unclassified(100)
Otu1771	0	1	0	0	0	0	0	0	0	0	0	0	0	0	unclassified(100)	unclassified(100)	unclassified(100)	unclassified(100)	unclassified(100)
Otu1774	0	0	0	0	0	0	0	0	0	0	0	1	0	0	Proteobacteria(100)	unclassified(100)	unclassified(100)	unclassified(100)	unclassified(100)
Otu1775	0	0	0	0	0	0	0	1	0	0	0	0	0	0	Proteobacteria(100)	Betaproteobacteria(100)	unclassified(100)	unclassified(100)	unclassified(100)
Otu1777	0	1	0	0	0	0	0	0	0	0	0	0	0	0	unclassified(100)	unclassified(100)	unclassified(100)	unclassified(100)	unclassified(100)
Otu1778	0	0	0	0	0	0	0	1	0	0	0	0	0	0	Proteobacteria(100)	unclassified(100)	unclassified(100)	unclassified(100)	unclassified(100)
Otu1779	0	1	0	0	0	0	0	0	0	0	0	0	0	0	Actinobacteria(100)	Actinobacteria(100)	Actinomycetales(100)	unclassified(100)	unclassified(100)
Otu1780	0	0	0	0	0	0	0	1	0	0	0	0	0	0	Proteobacteria(100)	Gammaproteobacteria(100)	unclassified(100)	unclassified(100)	unclassified(100)
Otu1784	0	0	0	0	0	0	0	0	0	0	0	1	0	0	Actinobacteria(100)	Actinobacteria(100)	Actinomycetales(100)	Streptosporangiaceae(100)	unclassified(100)
Otu1786	0	0	0	0	0	0	0	1	0	0	0	0	0	0	Proteobacteria(100)	Betaproteobacteria(100)	Burkholderiales(100)	unclassified(100)	unclassified(100)
Otu1787	0	1	0	0	0	0	0	0	0	0	0	0	0	0	Acidobacteria(100)	Acidobacteria_Gp1(100)	Acidobacteria_Gp1_order_incertae_sedis(100)	Acidobacteria_Gp1_family_incertae_sedis(100)	Gp1(100)
Otu1788	0	1	0	0	0	0	0	0	0	0	0	0	0	0	Proteobacteria(100)	unclassified(100)	unclassified(100)	unclassified(100)	unclassified(100)
Otu1789	0	0	0	0	0	0	0	1	0	0	0	0	0	0	unclassified(100)	unclassified(100)	unclassified(100)	unclassified(100)	unclassified(100)
Otu1792	0	0	0	0	0	0	0	0	0	0	0	1	0	0	Proteobacteria(100)	Gammaproteobacteria(100)	Xanthomonadales(100)	Xanthomonadaceae(100)	unclassified(100)
Otu1794	0	0	0	0	0	0	0	1	0	0	0	0	0	0	Proteobacteria(100)	Betaproteobacteria(100)	Burkholderiales(100)	Oxalobacteraceae(100)	Massilia(100)
Otu1797	0	0	0	0	0	0	0	1	0	0	0	0	0	0	Proteobacteria(100)	Betaproteobacteria(100)	Burkholderiales(100)	unclassified(100)	unclassified(100)
Otu1798	0	0	0	0	0	0	0	1	0	0	0	0	0	0	Firmicutes(100)	Bacilli(100)	Bacillales(100)	Paenibacillaceae_1(100)	Paenibacillus(100)
Otu1800	0	0	0	0	0	0	0	1	0	0	0	0	0	0	Proteobacteria(100)	Betaproteobacteria(100)	Burkholderiales(100)	unclassified(100)	unclassified(100)
Otu1802	0	0	0	0	0	0	0	0	0	0	0	1	0	0	unclassified(100)	unclassified(100)	unclassified(100)	unclassified(100)	unclassified(100)
Otu1803	0	0	0	0	0	0	0	0	0	0	0	1	0	0	Actinobacteria(100)	Actinobacteria(100)	unclassified(100)	unclassified(100)	unclassified(100)
Otu1805	0	0	0	0	0	0	0	1	0	0	0	0	0	0	Proteobacteria(100)	unclassified(100)	unclassified(100)	unclassified(100)	unclassified(100)
Otu1806	0	0	0	0	0	0	0	1	0	0	0	0	0	0	Proteobacteria(100)	Alphaproteobacteria(100)	Sphingomonadales(100)	Sphingomonadaceae(100)	unclassified(100)
Otu1808	0	0	0	0	0	0	0	1	0	0	0	0	0	0	unclassified(100)	unclassified(100)	unclassified(100)	unclassified(100)	unclassified(100)
Otu1813	0	0	0	0	0	0	0	1	0	0	0	0	0	0	Proteobacteria(100)	Alphaproteobacteria(100)	Rhizobiales(100)	Bradyrhizobiaceae(100)	Bosea(100)
Otu1814	0	0	0	0	0	0	0	0	0	0	0	1	0	0	Bacteroidetes(100)	Sphingobacteria(100)	Sphingobacteriales(100)	unclassified(100)	unclassified(100)
Otu1816	0	0	0	0	0	0	0	1	0	0	0	0	0	0	Proteobacteria(100)	Betaproteobacteria(100)	Burkholderiales(100)	Oxalobacteraceae(100)	unclassified(100)
Otu1818	0	0	0	0	0	0	0	1	0	0	0	0	0	0	unclassified(100)	unclassified(100)	unclassified(100)	unclassified(100)	unclassified(100)
Otu1821	0	0	0	0	0	0	0	1	0	0	0	0	0	0	Proteobacteria(100)	unclassified(100)	unclassified(100)	unclassified(100)	unclassified(100)
Otu1822	0	1	0	0	0	0	0	0	0	0	0	0	0	0	unclassified(100)	unclassified(100)	unclassified(100)	unclassified(100)	unclassified(100)
Otu1823	0	0	0	0	0	0	0	1	0	0	0	0	0	0	Proteobacteria(100)	unclassified(100)	unclassified(100)	unclassified(100)	unclassified(100)
Otu1825	0	0	0	0	0	0	0	1	0	0	0	0	0	0	Proteobacteria(100)	Betaproteobacteria(100)	Burkholderiales(100)	Oxalobacteraceae(100)	unclassified(100)
Otu1827	0	0	0	0	0	0	0	1	0	0	0	0	0	0	Proteobacteria(100)	Betaproteobacteria(100)	Burkholderiales(100)	Oxalobacteraceae(100)	Telluria(100)
Otu1830	0	0	0	0	0	0	0	0	0	0	0	1	0	0	Proteobacteria(100)	Alphaproteobacteria(100)	Rhizobiales(100)	unclassified(100)	unclassified(100)
Otu1835	0	1	0	0	0	0	0	0	0	0	0	0	0	0	Proteobacteria(100)	Alphaproteobacteria(100)	Rhizobiales(100)	Hyphomicrobiaceae(100)	unclassified(100)
Otu1837	0	1	0	0	0	0	0	0	0	0	0	0	0	0	Firmicutes(100)	Bacilli(100)	unclassified(100)	unclassified(100)	unclassified(100)
Otu1839	0	1	0	0	0	0	0	0	0	0	0	0	0	0	Proteobacteria(100)	Alphaproteobacteria(100)	unclassified(100)	unclassified(100)	unclassified(100)
Otu1840	0	1	0	0	0	0	0	0	0	0	0	0	0	0	Proteobacteria(100)	Alphaproteobacteria(100)	Sphingomonadales(100)	Sphingomonadaceae(100)	unclassified(100)
Otu1841	0	1	0	0	0	0	0	0	0	0	0	0	0	0	Proteobacteria(100)	Betaproteobacteria(100)	unclassified(100)	unclassified(100)	unclassified(100)
Otu1843	0	1	0	0	0	0	0	0	0	0	0	0	0	0	unclassified(100)	unclassified(100)	unclassified(100)	unclassified(100)	unclassified(100)
Otu1844	0	1	0	0	0	0	0	0	0	0	0	0	0	0	Proteobacteria(100)	Alphaproteobacteria(100)	Rhodobacterales(100)	Rhodobacteraceae(100)	unclassified(100)
Otu1847	0	1	0	0	0	0	0	0	0	0	0	0	0	0	Proteobacteria(100)	Alphaproteobacteria(100)	Sphingomonadales(100)	Sphingomonadaceae(100)	unclassified(100)
Otu1851	0	1	0	0	0	0	0	0	0	0	0	0	0	0	Acidobacteria(100)	Acidobacteria_Gp1(100)	Acidobacteria_Gp1_order_incertae_sedis(100)	Acidobacteria_Gp1_family_incertae_sedis(100)	Gp1(100)
Otu1852	0	1	0	0	0	0	0	0	0	0	0	0	0	0	Proteobacteria(100)	Gammaproteobacteria(100)	Xanthomonadales(100)	Xanthomonadaceae(100)	unclassified(100)
Otu1854	0	1	0	0	0	0	0	0	0	0	0	0	0	0	Proteobacteria(100)	Betaproteobacteria(100)	unclassified(100)	unclassified(100)	unclassified(100)
Otu1856	0	0	0	0	0	0	1	0	0	0	0	0	0	0	Bacteroidetes(100)	Sphingobacteria(100)	Sphingobacteriales(100)	Chitinophagaceae(100)	unclassified(100)
Otu1857	0	0	0	0	0	0	1	0	0	0	0	0	0	0	Proteobacteria(100)	Gammaproteobacteria(100)	Legionellales(100)	Coxiellaceae(100)	Aquicella(100)
Otu1858	0	0	0	0	0	0	1	0	0	0	0	0	0	0	Proteobacteria(100)	Betaproteobacteria(100)	Burkholderiales(100)	unclassified(100)	unclassified(100)
Otu1860	0	0	0	0	0	0	1	0	0	0	0	0	0	0	Proteobacteria(100)	Alphaproteobacteria(100)	Sphingomonadales(100)	Sphingomonadaceae(100)	Sphingomonas(100)
Otu1861	0	0	0	0	0	0	1	0	0	0	0	0	0	0	Proteobacteria(100)	Alphaproteobacteria(100)	Sphingomonadales(100)	unclassified(100)	unclassified(100)
Otu1862	0	1	0	0	0	0	0	0	0	0	0	0	0	0	Proteobacteria(100)	Gammaproteobacteria(100)	unclassified(100)	unclassified(100)	unclassified(100)
Otu1863	0	1	0	0	0	0	0	0	0	0	0	0	0	0	unclassified(100)	unclassified(100)	unclassified(100)	unclassified(100)	unclassified(100)
Otu1864	0	1	0	0	0	0	0	0	0	0	0	0	0	0	Bacteroidetes(100)	Sphingobacteria(100)	Sphingobacteriales(100)	Chitinophagaceae(100)	unclassified(100)
Otu1865	0	1	0	0	0	0	0	0	0	0	0	0	0	0	Proteobacteria(100)	Deltaproteobacteria(100)	Myxococcales(100)	Cystobacteraceae(100)	unclassified(100)
Otu1866	0	1	0	0	0	0	0	0	0	0	0	0	0	0	Proteobacteria(100)	Alphaproteobacteria(100)	Rhodospirillales(100)	unclassified(100)	unclassified(100)
Otu1867	0	1	0	0	0	0	0	0	0	0	0	0	0	0	unclassified(100)	unclassified(100)	unclassified(100)	unclassified(100)	unclassified(100)
Otu1868	0	1	0	0	0	0	0	0	0	0	0	0	0	0	Proteobacteria(100)	Alphaproteobacteria(100)	Rhodospirillales(100)	Acetobacteraceae(100)	unclassified(100)
Otu1869	0	1	0	0	0	0	0	0	0	0	0	0	0	0	Proteobacteria(100)	Betaproteobacteria(100)	unclassified(100)	unclassified(100)	unclassified(100)
Otu1871	0	1	0	0	0	0	0	0	0	0	0	0	0	0	Proteobacteria(100)	Alphaproteobacteria(100)	Rhodospirillales(100)	unclassified(100)	unclassified(100)
Otu1874	0	1	0	0	0	0	0	0	0	0	0	0	0	0	unclassified(100)	unclassified(100)	unclassified(100)	unclassified(100)	unclassified(100)
Otu1875	0	1	0	0	0	0	0	0	0	0	0	0	0	0	unclassified(100)	unclassified(100)	unclassified(100)	unclassified(100)	unclassified(100)
Otu1876	0	1	0	0	0	0	0	0	0	0	0	0	0	0	unclassified(100)	unclassified(100)	unclassified(100)	unclassified(100)	unclassified(100)
Otu1877	0	1	0	0	0	0	0	0	0	0	0	0	0	0	unclassified(100)	unclassified(100)	unclassified(100)	unclassified(100)	unclassified(100)
Otu1879	0	1	0	0	0	0	0	0	0	0	0	0	0	0	Bacteroidetes(100)	unclassified(100)	unclassified(100)	unclassified(100)	unclassified(100)
Otu1880	0	1	0	0	0	0	0	0	0	0	0	0	0	0	Bacteroidetes(100)	Sphingobacteria(100)	Sphingobacteriales(100)	Cytophagaceae(100)	Rhodocytophaga(100)
Otu1883	0	1	0	0	0	0	0	0	0	0	0	0	0	0	unclassified(100)	unclassified(100)	unclassified(100)	unclassified(100)	unclassified(100)
Otu1884	0	0	0	0	0	0	0	0	0	0	0	1	0	0	Proteobacteria(100)	Betaproteobacteria(100)	Methylophilales(100)	Methylophilaceae(100)	Methylotenera(100)
Otu1885	0	1	0	0	0	0	0	0	0	0	0	0	0	0	unclassified(100)	unclassified(100)	unclassified(100)	unclassified(100)	unclassified(100)
Otu1887	0	0	0	0	0	0	0	0	0	0	0	1	0	0	unclassified(100)	unclassified(100)	unclassified(100)	unclassified(100)	unclassified(100)
Otu1888	0	1	0	0	0	0	0	0	0	0	0	0	0	0	unclassified(100)	unclassified(100)	unclassified(100)	unclassified(100)	unclassified(100)
Otu1889	0	0	0	0	0	0	0	1	0	0	0	0	0	0	Proteobacteria(100)	Betaproteobacteria(100)	Burkholderiales(100)	Oxalobacteraceae(100)	unclassified(100)
Otu1892	0	1	0	0	0	0	0	0	0	0	0	0	0	0	unclassified(100)	unclassified(100)	unclassified(100)	unclassified(100)	unclassified(100)
Otu1893	0	1	0	0	0	0	0	0	0	0	0	0	0	0	unclassified(100)	unclassified(100)	unclassified(100)	unclassified(100)	unclassified(100)
Otu1895	0	0	0	0	0	0	0	1	0	0	0	0	0	0	Proteobacteria(100)	Alphaproteobacteria(100)	Sphingomonadales(100)	Erythrobacteraceae(100)	unclassified(100)
Otu1896	0	0	0	0	0	0	0	1	0	0	0	0	0	0	Proteobacteria(100)	Alphaproteobacteria(100)	Rhizobiales(100)	unclassified(100)	unclassified(100)
Otu1898	0	0	0	0	0	0	0	0	0	0	0	1	0	0	Bacteroidetes(100)	Sphingobacteria(100)	Sphingobacteriales(100)	Chitinophagaceae(100)	Ferruginibacter(100)
Otu1899	0	1	0	0	0	0	0	0	0	0	0	0	0	0	Proteobacteria(100)	Alphaproteobacteria(100)	unclassified(100)	unclassified(100)	unclassified(100)
Otu1900	0	1	0	0	0	0	0	0	0	0	0	0	0	0	Acidobacteria(100)	Acidobacteria_Gp3(100)	unclassified(100)	unclassified(100)	unclassified(100)
Otu1901	0	1	0	0	0	0	0	0	0	0	0	0	0	0	unclassified(100)	unclassified(100)	unclassified(100)	unclassified(100)	unclassified(100)
Otu1903	0	1	0	0	0	0	0	0	0	0	0	0	0	0	unclassified(100)	unclassified(100)	unclassified(100)	unclassified(100)	unclassified(100)
Otu1904	0	1	0	0	0	0	0	0	0	0	0	0	0	0	Acidobacteria(100)	unclassified(100)	unclassified(100)	unclassified(100)	unclassified(100)
Otu1908	0	1	0	0	0	0	0	0	0	0	0	0	0	0	unclassified(100)	unclassified(100)	unclassified(100)	unclassified(100)	unclassified(100)
Otu1910	0	0	0	0	0	0	0	1	0	0	0	0	0	0	Proteobacteria(100)	unclassified(100)	unclassified(100)	unclassified(100)	unclassified(100)
Otu1911	0	1	0	0	0	0	0	0	0	0	0	0	0	0	unclassified(100)	unclassified(100)	unclassified(100)	unclassified(100)	unclassified(100)
Otu1913	0	1	0	0	0	0	0	0	0	0	0	0	0	0	unclassified(100)	unclassified(100)	unclassified(100)	unclassified(100)	unclassified(100)
Otu1914	0	1	0	0	0	0	0	0	0	0	0	0	0	0	unclassified(100)	unclassified(100)	unclassified(100)	unclassified(100)	unclassified(100)
Otu1915	0	1	0	0	0	0	0	0	0	0	0	0	0	0	Actinobacteria(100)	Actinobacteria(100)	Actinomycetales(100)	unclassified(100)	unclassified(100)
Otu1917	0	1	0	0	0	0	0	0	0	0	0	0	0	0	Proteobacteria(100)	Betaproteobacteria(100)	Burkholderiales(100)	Comamonadaceae(100)	unclassified(100)
Otu1918	0	0	0	0	0	0	0	0	0	0	0	1	0	0	Actinobacteria(100)	Actinobacteria(100)	Actinomycetales(100)	unclassified(100)	unclassified(100)
Otu1920	0	0	0	0	0	0	0	0	0	0	0	1	0	0	Bacteroidetes(100)	Sphingobacteria(100)	Sphingobacteriales(100)	unclassified(100)	unclassified(100)
Otu1921	1	0	0	0	0	0	0	0	0	0	0	0	0	0	Proteobacteria(100)	unclassified(100)	unclassified(100)	unclassified(100)	unclassified(100)
Otu1922	0	0	0	0	0	0	0	0	1	0	0	0	0	0	unclassified(100)	unclassified(100)	unclassified(100)	unclassified(100)	unclassified(100)
Otu1923	0	0	0	0	0	0	0	0	0	0	0	1	0	0	Firmicutes(100)	Clostridia(100)	Clostridiales(100)	unclassified(100)	unclassified(100)
Otu1924	1	0	0	0	0	0	0	0	0	0	0	0	0	0	unclassified(100)	unclassified(100)	unclassified(100)	unclassified(100)	unclassified(100)
Otu1925	0	0	0	0	0	0	0	0	1	0	0	0	0	0	Chlamydiae(100)	Chlamydiae(100)	Chlamydiales(100)	Parachlamydiaceae(100)	unclassified(100)
Otu1926	0	0	0	0	0	0	0	0	1	0	0	0	0	0	unclassified(100)	unclassified(100)	unclassified(100)	unclassified(100)	unclassified(100)
Otu1928	0	0	0	0	0	0	0	0	0	0	0	1	0	0	unclassified(100)	unclassified(100)	unclassified(100)	unclassified(100)	unclassified(100)
Otu1930	1	0	0	0	0	0	0	0	0	0	0	0	0	0	unclassified(100)	unclassified(100)	unclassified(100)	unclassified(100)	unclassified(100)
Otu1931	0	0	0	0	0	0	0	0	1	0	0	0	0	0	Bacteroidetes(100)	Sphingobacteria(100)	Sphingobacteriales(100)	unclassified(100)	unclassified(100)
Otu1932	1	0	0	0	0	0	0	0	0	0	0	0	0	0	Actinobacteria(100)	Actinobacteria(100)	Actinomycetales(100)	Intrasporangiaceae(100)	Phycicoccus(100)
Otu1933	0	0	0	0	0	0	0	0	0	0	0	1	0	0	Proteobacteria(100)	Betaproteobacteria(100)	Burkholderiales(100)	unclassified(100)	unclassified(100)
Otu1934	0	0	0	0	0	0	0	0	1	0	0	0	0	0	Proteobacteria(100)	unclassified(100)	unclassified(100)	unclassified(100)	unclassified(100)
Otu1935	0	0	0	0	0	0	0	0	1	0	0	0	0	0	Proteobacteria(100)	Alphaproteobacteria(100)	Sphingomonadales(100)	unclassified(100)	unclassified(100)
Otu1936	1	0	0	0	0	0	0	0	0	0	0	0	0	0	unclassified(100)	unclassified(100)	unclassified(100)	unclassified(100)	unclassified(100)
Otu1937	1	0	0	0	0	0	0	0	0	0	0	0	0	0	Proteobacteria(100)	Alphaproteobacteria(100)	unclassified(100)	unclassified(100)	unclassified(100)
Otu1938	0	0	0	0	0	0	0	0	1	0	0	0	0	0	unclassified(100)	unclassified(100)	unclassified(100)	unclassified(100)	unclassified(100)
Otu1939	0	0	0	0	0	0	0	0	1	0	0	0	0	0	Proteobacteria(100)	Betaproteobacteria(100)	Burkholderiales(100)	Burkholderiaceae(100)	unclassified(100)
Otu1941	0	0	0	0	0	0	0	0	1	0	0	0	0	0	Proteobacteria(100)	Alphaproteobacteria(100)	unclassified(100)	unclassified(100)	unclassified(100)
Otu1942	0	0	0	0	0	0	0	0	1	0	0	0	0	0	Proteobacteria(100)	unclassified(100)	unclassified(100)	unclassified(100)	unclassified(100)
Otu1943	1	0	0	0	0	0	0	0	0	0	0	0	0	0	Proteobacteria(100)	Alphaproteobacteria(100)	unclassified(100)	unclassified(100)	unclassified(100)
Otu1944	0	0	0	0	0	0	0	0	0	0	0	1	0	0	unclassified(100)	unclassified(100)	unclassified(100)	unclassified(100)	unclassified(100)
Otu1945	1	0	0	0	0	0	0	0	0	0	0	0	0	0	Proteobacteria(100)	Alphaproteobacteria(100)	Rhodospirillales(100)	Rhodospirillaceae(100)	Oceanibaculum(100)
Otu1946	0	0	0	0	0	0	0	0	0	0	0	1	0	0	Bacteroidetes(100)	Sphingobacteria(100)	Sphingobacteriales(100)	Chitinophagaceae(100)	unclassified(100)
Otu1947	1	0	0	0	0	0	0	0	0	0	0	0	0	0	unclassified(100)	unclassified(100)	unclassified(100)	unclassified(100)	unclassified(100)
Otu1948	1	0	0	0	0	0	0	0	0	0	0	0	0	0	Proteobacteria(100)	Betaproteobacteria(100)	unclassified(100)	unclassified(100)	unclassified(100)
Otu1949	1	0	0	0	0	0	0	0	0	0	0	0	0	0	unclassified(100)	unclassified(100)	unclassified(100)	unclassified(100)	unclassified(100)
Otu1950	1	0	0	0	0	0	0	0	0	0	0	0	0	0	unclassified(100)	unclassified(100)	unclassified(100)	unclassified(100)	unclassified(100)
Otu1951	0	0	0	0	0	0	0	0	1	0	0	0	0	0	Acidobacteria(100)	Acidobacteria_Gp1(100)	Acidobacteria_Gp1_order_incertae_sedis(100)	Acidobacteria_Gp1_family_incertae_sedis(100)	Gp1(100)
Otu1952	0	0	0	0	0	0	0	0	1	0	0	0	0	0	Proteobacteria(100)	Alphaproteobacteria(100)	unclassified(100)	unclassified(100)	unclassified(100)
Otu1953	1	0	0	0	0	0	0	0	0	0	0	0	0	0	Proteobacteria(100)	Alphaproteobacteria(100)	unclassified(100)	unclassified(100)	unclassified(100)
Otu1954	0	0	0	0	0	0	0	0	1	0	0	0	0	0	Proteobacteria(100)	Betaproteobacteria(100)	Burkholderiales(100)	unclassified(100)	unclassified(100)
Otu1955	0	0	0	0	0	0	0	0	1	0	0	0	0	0	Proteobacteria(100)	Betaproteobacteria(100)	unclassified(100)	unclassified(100)	unclassified(100)
Otu1956	0	0	0	0	0	0	0	0	1	0	0	0	0	0	unclassified(100)	unclassified(100)	unclassified(100)	unclassified(100)	unclassified(100)
Otu1957	0	0	0	0	0	0	0	0	1	0	0	0	0	0	unclassified(100)	unclassified(100)	unclassified(100)	unclassified(100)	unclassified(100)
Otu1958	0	0	0	0	0	0	0	0	1	0	0	0	0	0	Proteobacteria(100)	Deltaproteobacteria(100)	Bdellovibrionales(100)	Bacteriovoracaceae(100)	Peredibacter(100)
Otu1959	1	0	0	0	0	0	0	0	0	0	0	0	0	0	unclassified(100)	unclassified(100)	unclassified(100)	unclassified(100)	unclassified(100)
Otu1960	0	0	0	0	0	0	0	0	1	0	0	0	0	0	Proteobacteria(100)	Alphaproteobacteria(100)	unclassified(100)	unclassified(100)	unclassified(100)
Otu1961	1	0	0	0	0	0	0	0	0	0	0	0	0	0	Proteobacteria(100)	Alphaproteobacteria(100)	Caulobacterales(100)	Caulobacteraceae(100)	Brevundimonas(100)
Otu1962	1	0	0	0	0	0	0	0	0	0	0	0	0	0	unclassified(100)	unclassified(100)	unclassified(100)	unclassified(100)	unclassified(100)
Otu1963	0	0	0	0	0	0	0	0	0	0	0	1	0	0	Bacteroidetes(100)	Sphingobacteria(100)	Sphingobacteriales(100)	Chitinophagaceae(100)	Segetibacter(100)
Otu1964	1	0	0	0	0	0	0	0	0	0	0	0	0	0	Actinobacteria(100)	Actinobacteria(100)	Actinomycetales(100)	Micrococcaceae(100)	Arthrobacter(100)
Otu1965	0	0	0	0	0	0	0	0	1	0	0	0	0	0	Proteobacteria(100)	Gammaproteobacteria(100)	Xanthomonadales(100)	Xanthomonadaceae(100)	unclassified(100)
Otu1967	0	0	0	0	0	0	0	0	1	0	0	0	0	0	unclassified(100)	unclassified(100)	unclassified(100)	unclassified(100)	unclassified(100)
Otu1968	0	0	0	0	0	0	0	0	1	0	0	0	0	0	Proteobacteria(100)	Alphaproteobacteria(100)	Rhizobiales(100)	Hyphomicrobiaceae(100)	Devosia(100)
Otu1969	0	0	0	0	0	0	0	0	1	0	0	0	0	0	Bacteroidetes(100)	Bacteroidetes_incertae_sedis_class_incertae_sedis(100)	Bacteroidetes_incertae_sedis_order_incertae_sedis(100)	Bacteroidetes_incertae_sedis_family_incertae_sedis(100)	Ohtaekwangia(100)
Otu1970	0	0	0	0	0	0	0	0	1	0	0	0	0	0	unclassified(100)	unclassified(100)	unclassified(100)	unclassified(100)	unclassified(100)
Otu1971	0	0	0	0	0	0	0	0	1	0	0	0	0	0	Proteobacteria(100)	Betaproteobacteria(100)	Burkholderiales(100)	Comamonadaceae(100)	Ramlibacter(100)
Otu1972	0	0	0	0	0	0	0	0	0	0	0	1	0	0	Proteobacteria(100)	Alphaproteobacteria(100)	unclassified(100)	unclassified(100)	unclassified(100)
Otu1973	0	0	0	0	0	0	0	0	1	0	0	0	0	0	Proteobacteria(100)	unclassified(100)	unclassified(100)	unclassified(100)	unclassified(100)
Otu1974	0	0	0	0	0	0	0	0	1	0	0	0	0	0	Proteobacteria(100)	Alphaproteobacteria(100)	Sphingomonadales(100)	Sphingomonadaceae(100)	unclassified(100)
Otu1975	0	0	0	0	0	0	0	0	1	0	0	0	0	0	unclassified(100)	unclassified(100)	unclassified(100)	unclassified(100)	unclassified(100)
Otu1978	0	0	0	0	0	0	0	0	0	0	0	1	0	0	Bacteroidetes(100)	Sphingobacteria(100)	Sphingobacteriales(100)	Chitinophagaceae(100)	unclassified(100)
Otu1979	0	0	0	0	0	0	0	0	0	0	0	1	0	0	Proteobacteria(100)	Alphaproteobacteria(100)	unclassified(100)	unclassified(100)	unclassified(100)
Otu1980	0	0	0	0	0	0	0	0	1	0	0	0	0	0	Proteobacteria(100)	Betaproteobacteria(100)	Burkholderiales(100)	Oxalobacteraceae(100)	unclassified(100)
Otu1981	0	0	0	0	0	0	0	0	1	0	0	0	0	0	Proteobacteria(100)	Betaproteobacteria(100)	unclassified(100)	unclassified(100)	unclassified(100)
Otu1982	0	0	0	0	0	0	0	0	1	0	0	0	0	0	Proteobacteria(100)	Betaproteobacteria(100)	unclassified(100)	unclassified(100)	unclassified(100)
Otu1983	0	0	0	0	0	0	0	0	1	0	0	0	0	0	Proteobacteria(100)	Alphaproteobacteria(100)	unclassified(100)	unclassified(100)	unclassified(100)
Otu1984	0	0	0	0	0	0	0	0	1	0	0	0	0	0	Proteobacteria(100)	Betaproteobacteria(100)	unclassified(100)	unclassified(100)	unclassified(100)
Otu1985	0	0	0	0	0	0	0	0	1	0	0	0	0	0	Proteobacteria(100)	Betaproteobacteria(100)	Burkholderiales(100)	unclassified(100)	unclassified(100)
Otu1986	0	0	0	0	0	0	0	0	1	0	0	0	0	0	Proteobacteria(100)	unclassified(100)	unclassified(100)	unclassified(100)	unclassified(100)
Otu1987	0	0	0	0	0	0	0	0	1	0	0	0	0	0	Proteobacteria(100)	Alphaproteobacteria(100)	Rhodospirillales(100)	Acetobacteraceae(100)	unclassified(100)
Otu1988	0	0	0	0	0	0	0	0	1	0	0	0	0	0	unclassified(100)	unclassified(100)	unclassified(100)	unclassified(100)	unclassified(100)
Otu1989	0	0	0	0	0	0	0	0	1	0	0	0	0	0	unclassified(100)	unclassified(100)	unclassified(100)	unclassified(100)	unclassified(100)
Otu1990	0	0	0	0	0	0	0	0	1	0	0	0	0	0	unclassified(100)	unclassified(100)	unclassified(100)	unclassified(100)	unclassified(100)
Otu1991	0	0	0	0	0	0	0	0	1	0	0	0	0	0	Proteobacteria(100)	Alphaproteobacteria(100)	Rhizobiales(100)	unclassified(100)	unclassified(100)
Otu1992	0	0	0	0	0	0	0	0	1	0	0	0	0	0	Proteobacteria(100)	Betaproteobacteria(100)	unclassified(100)	unclassified(100)	unclassified(100)
Otu1994	0	0	0	0	0	0	0	0	1	0	0	0	0	0	Proteobacteria(100)	Betaproteobacteria(100)	Burkholderiales(100)	unclassified(100)	unclassified(100)
Otu1996	0	0	0	0	0	0	0	0	1	0	0	0	0	0	Proteobacteria(100)	Alphaproteobacteria(100)	unclassified(100)	unclassified(100)	unclassified(100)
Otu1997	0	0	0	0	0	0	0	0	1	0	0	0	0	0	Proteobacteria(100)	Betaproteobacteria(100)	Burkholderiales(100)	unclassified(100)	unclassified(100)
Otu1998	1	0	0	0	0	0	0	0	0	0	0	0	0	0	Proteobacteria(100)	Betaproteobacteria(100)	unclassified(100)	unclassified(100)	unclassified(100)
Otu1999	0	0	0	0	0	0	0	0	1	0	0	0	0	0	Proteobacteria(100)	unclassified(100)	unclassified(100)	unclassified(100)	unclassified(100)
Otu2000	0	0	0	0	0	0	0	0	1	0	0	0	0	0	unclassified(100)	unclassified(100)	unclassified(100)	unclassified(100)	unclassified(100)
Otu2001	0	0	0	0	0	0	0	0	1	0	0	0	0	0	Proteobacteria(100)	unclassified(100)	unclassified(100)	unclassified(100)	unclassified(100)
Otu2002	0	0	0	0	0	0	0	0	1	0	0	0	0	0	Proteobacteria(100)	Alphaproteobacteria(100)	Sphingomonadales(100)	Sphingomonadaceae(100)	unclassified(100)
Otu2003	0	0	0	0	0	0	0	0	1	0	0	0	0	0	Proteobacteria(100)	Alphaproteobacteria(100)	Rhizobiales(100)	unclassified(100)	unclassified(100)
Otu2004	0	0	0	0	0	0	0	0	1	0	0	0	0	0	unclassified(100)	unclassified(100)	unclassified(100)	unclassified(100)	unclassified(100)
Otu2005	0	0	0	0	0	0	0	0	1	0	0	0	0	0	Gemmatimonadetes(100)	Gemmatimonadetes(100)	Gemmatimonadales(100)	Gemmatimonadaceae(100)	Gemmatimonas(100)
Otu2006	0	0	0	0	0	0	0	0	1	0	0	0	0	0	Proteobacteria(100)	Betaproteobacteria(100)	unclassified(100)	unclassified(100)	unclassified(100)
Otu2007	0	0	0	0	0	0	0	0	0	0	0	1	0	0	unclassified(100)	unclassified(100)	unclassified(100)	unclassified(100)	unclassified(100)
Otu2008	0	0	0	0	0	0	0	0	0	0	0	1	0	0	Actinobacteria(100)	Actinobacteria(100)	Actinomycetales(100)	Micromonosporaceae(100)	unclassified(100)
Otu2009	0	0	0	0	0	0	0	1	0	0	0	0	0	0	Proteobacteria(100)	Betaproteobacteria(100)	unclassified(100)	unclassified(100)	unclassified(100)
Otu2012	0	0	0	0	0	0	0	0	0	0	0	1	0	0	unclassified(100)	unclassified(100)	unclassified(100)	unclassified(100)	unclassified(100)
Otu2013	0	0	0	0	0	0	0	0	0	0	0	1	0	0	Bacteroidetes(100)	Sphingobacteria(100)	Sphingobacteriales(100)	Chitinophagaceae(100)	unclassified(100)
Otu2017	0	0	0	0	0	0	0	0	0	0	0	1	0	0	Actinobacteria(100)	Actinobacteria(100)	Actinomycetales(100)	Pseudonocardiaceae(100)	Lentzea(100)
Otu2019	0	0	0	0	0	0	0	1	0	0	0	0	0	0	unclassified(100)	unclassified(100)	unclassified(100)	unclassified(100)	unclassified(100)
Otu2020	0	0	0	0	0	0	0	1	0	0	0	0	0	0	Proteobacteria(100)	Betaproteobacteria(100)	unclassified(100)	unclassified(100)	unclassified(100)
Otu2022	1	0	0	0	0	0	0	0	0	0	0	0	0	0	Bacteroidetes(100)	Sphingobacteria(100)	Sphingobacteriales(100)	unclassified(100)	unclassified(100)
Otu2023	1	0	0	0	0	0	0	0	0	0	0	0	0	0	Proteobacteria(100)	Betaproteobacteria(100)	unclassified(100)	unclassified(100)	unclassified(100)
Otu2024	0	0	0	0	0	0	0	1	0	0	0	0	0	0	Proteobacteria(100)	Alphaproteobacteria(100)	Rhizobiales(100)	unclassified(100)	unclassified(100)
Otu2026	1	0	0	0	0	0	0	0	0	0	0	0	0	0	unclassified(100)	unclassified(100)	unclassified(100)	unclassified(100)	unclassified(100)
Otu2027	0	0	0	0	0	0	0	1	0	0	0	0	0	0	Proteobacteria(100)	Betaproteobacteria(100)	Hydrogenophilales(100)	Hydrogenophilaceae(100)	Sulfuricella(100)
Otu2028	1	0	0	0	0	0	0	0	0	0	0	0	0	0	unclassified(100)	unclassified(100)	unclassified(100)	unclassified(100)	unclassified(100)
Otu2029	0	0	0	0	0	0	0	1	0	0	0	0	0	0	Proteobacteria(100)	Betaproteobacteria(100)	unclassified(100)	unclassified(100)	unclassified(100)
Otu2034	0	0	0	0	0	0	0	1	0	0	0	0	0	0	Firmicutes(100)	unclassified(100)	unclassified(100)	unclassified(100)	unclassified(100)
Otu2036	0	0	0	0	0	0	0	1	0	0	0	0	0	0	Proteobacteria(100)	Betaproteobacteria(100)	unclassified(100)	unclassified(100)	unclassified(100)
Otu2038	0	0	0	0	0	0	0	1	0	0	0	0	0	0	Proteobacteria(100)	Alphaproteobacteria(100)	Rhizobiales(100)	unclassified(100)	unclassified(100)
Otu2039	0	0	0	0	0	0	0	0	0	0	0	1	0	0	Proteobacteria(100)	Alphaproteobacteria(100)	Rhizobiales(100)	Hyphomicrobiaceae(100)	Devosia(100)
Otu2040	0	0	0	0	0	0	0	1	0	0	0	0	0	0	Acidobacteria(100)	Acidobacteria_Gp3(100)	Acidobacteria_Gp3_order_incertae_sedis(100)	Acidobacteria_Gp3_family_incertae_sedis(100)	Gp3(100)
Otu2042	1	0	0	0	0	0	0	0	0	0	0	0	0	0	unclassified(100)	unclassified(100)	unclassified(100)	unclassified(100)	unclassified(100)
Otu2043	0	0	0	0	0	0	0	0	0	0	0	1	0	0	Proteobacteria(100)	Alphaproteobacteria(100)	Caulobacterales(100)	Caulobacteraceae(100)	Caulobacter(100)
Otu2048	0	0	0	0	0	0	0	0	0	0	0	1	0	0	unclassified(100)	unclassified(100)	unclassified(100)	unclassified(100)	unclassified(100)
Otu2049	0	0	0	0	0	0	0	0	0	0	0	1	0	0	unclassified(100)	unclassified(100)	unclassified(100)	unclassified(100)	unclassified(100)
Otu2051	0	0	0	0	0	0	0	0	0	0	0	1	0	0	Bacteroidetes(100)	Sphingobacteria(100)	Sphingobacteriales(100)	Chitinophagaceae(100)	unclassified(100)
Otu2053	1	0	0	0	0	0	0	0	0	0	0	0	0	0	unclassified(100)	unclassified(100)	unclassified(100)	unclassified(100)	unclassified(100)
Otu2055	1	0	0	0	0	0	0	0	0	0	0	0	0	0	Proteobacteria(100)	Alphaproteobacteria(100)	Rhizobiales(100)	unclassified(100)	unclassified(100)
Otu2056	0	0	0	0	0	0	0	0	0	0	0	1	0	0	unclassified(100)	unclassified(100)	unclassified(100)	unclassified(100)	unclassified(100)
Otu2057	1	0	0	0	0	0	0	0	0	0	0	0	0	0	unclassified(100)	unclassified(100)	unclassified(100)	unclassified(100)	unclassified(100)
Otu2058	0	0	0	0	0	0	0	0	0	0	0	1	0	0	Proteobacteria(100)	unclassified(100)	unclassified(100)	unclassified(100)	unclassified(100)
Otu2059	1	0	0	0	0	0	0	0	0	0	0	0	0	0	unclassified(100)	unclassified(100)	unclassified(100)	unclassified(100)	unclassified(100)
Otu2061	1	0	0	0	0	0	0	0	0	0	0	0	0	0	unclassified(100)	unclassified(100)	unclassified(100)	unclassified(100)	unclassified(100)
Otu2062	1	0	0	0	0	0	0	0	0	0	0	0	0	0	Proteobacteria(100)	Deltaproteobacteria(100)	Myxococcales(100)	unclassified(100)	unclassified(100)
Otu2063	1	0	0	0	0	0	0	0	0	0	0	0	0	0	Firmicutes(100)	unclassified(100)	unclassified(100)	unclassified(100)	unclassified(100)
Otu2064	1	0	0	0	0	0	0	0	0	0	0	0	0	0	Proteobacteria(100)	Alphaproteobacteria(100)	Rhizobiales(100)	unclassified(100)	unclassified(100)
Otu2066	1	0	0	0	0	0	0	0	0	0	0	0	0	0	unclassified(100)	unclassified(100)	unclassified(100)	unclassified(100)	unclassified(100)
Otu2067	1	0	0	0	0	0	0	0	0	0	0	0	0	0	Proteobacteria(100)	Betaproteobacteria(100)	Rhodocyclales(100)	Rhodocyclaceae(100)	unclassified(100)
Otu2068	1	0	0	0	0	0	0	0	0	0	0	0	0	0	unclassified(100)	unclassified(100)	unclassified(100)	unclassified(100)	unclassified(100)
Otu2069	1	0	0	0	0	0	0	0	0	0	0	0	0	0	unclassified(100)	unclassified(100)	unclassified(100)	unclassified(100)	unclassified(100)
Otu2071	1	0	0	0	0	0	0	0	0	0	0	0	0	0	Proteobacteria(100)	Deltaproteobacteria(100)	unclassified(100)	unclassified(100)	unclassified(100)
Otu2072	1	0	0	0	0	0	0	0	0	0	0	0	0	0	Proteobacteria(100)	Gammaproteobacteria(100)	unclassified(100)	unclassified(100)	unclassified(100)
Otu2073	1	0	0	0	0	0	0	0	0	0	0	0	0	0	unclassified(100)	unclassified(100)	unclassified(100)	unclassified(100)	unclassified(100)
Otu2074	1	0	0	0	0	0	0	0	0	0	0	0	0	0	Proteobacteria(100)	unclassified(100)	unclassified(100)	unclassified(100)	unclassified(100)
Otu2075	1	0	0	0	0	0	0	0	0	0	0	0	0	0	Actinobacteria(100)	Actinobacteria(100)	Actinomycetales(100)	Micrococcaceae(100)	Arthrobacter(100)
Otu2076	1	0	0	0	0	0	0	0	0	0	0	0	0	0	unclassified(100)	unclassified(100)	unclassified(100)	unclassified(100)	unclassified(100)
Otu2079	1	0	0	0	0	0	0	0	0	0	0	0	0	0	Proteobacteria(100)	Alphaproteobacteria(100)	Sphingomonadales(100)	Sphingomonadaceae(100)	Sphingomonas(100)
Otu2080	1	0	0	0	0	0	0	0	0	0	0	0	0	0	unclassified(100)	unclassified(100)	unclassified(100)	unclassified(100)	unclassified(100)
Otu2083	1	0	0	0	0	0	0	0	0	0	0	0	0	0	Armatimonadetes(100)	Armatimonadia(100)	Armatimonadales(100)	Armatimonadaceae(100)	Armatimonas_Armatimonadetes_gp1(100)
Otu2085	1	0	0	0	0	0	0	0	0	0	0	0	0	0	Actinobacteria(100)	Actinobacteria(100)	unclassified(100)	unclassified(100)	unclassified(100)
Otu2086	0	0	0	0	0	1	0	0	0	0	0	0	0	0	Proteobacteria(100)	unclassified(100)	unclassified(100)	unclassified(100)	unclassified(100)
Otu2087	1	0	0	0	0	0	0	0	0	0	0	0	0	0	Proteobacteria(100)	unclassified(100)	unclassified(100)	unclassified(100)	unclassified(100)
Otu2088	1	0	0	0	0	0	0	0	0	0	0	0	0	0	Proteobacteria(100)	Deltaproteobacteria(100)	Myxococcales(100)	unclassified(100)	unclassified(100)
Otu2090	1	0	0	0	0	0	0	0	0	0	0	0	0	0	Proteobacteria(100)	Alphaproteobacteria(100)	Rhodobacterales(100)	Rhodobacteraceae(100)	Rubellimicrobium(100)
Otu2092	0	0	0	0	0	0	0	0	0	0	0	1	0	0	Proteobacteria(100)	Gammaproteobacteria(100)	Xanthomonadales(100)	Xanthomonadaceae(100)	unclassified(100)
Otu2093	1	0	0	0	0	0	0	0	0	0	0	0	0	0	unclassified(100)	unclassified(100)	unclassified(100)	unclassified(100)	unclassified(100)
Otu2094	1	0	0	0	0	0	0	0	0	0	0	0	0	0	unclassified(100)	unclassified(100)	unclassified(100)	unclassified(100)	unclassified(100)
Otu2095	1	0	0	0	0	0	0	0	0	0	0	0	0	0	unclassified(100)	unclassified(100)	unclassified(100)	unclassified(100)	unclassified(100)
Otu2097	0	0	0	1	0	0	0	0	0	0	0	0	0	0	Proteobacteria(100)	Alphaproteobacteria(100)	Rhizobiales(100)	Rhizobiaceae(100)	Rhizobium(100)
Otu2098	0	0	0	0	0	0	0	0	0	0	1	0	0	0	Proteobacteria(100)	unclassified(100)	unclassified(100)	unclassified(100)	unclassified(100)
Otu2099	0	0	0	1	0	0	0	0	0	0	0	0	0	0	unclassified(100)	unclassified(100)	unclassified(100)	unclassified(100)	unclassified(100)
Otu2100	0	0	0	0	0	0	0	0	0	0	1	0	0	0	unclassified(100)	unclassified(100)	unclassified(100)	unclassified(100)	unclassified(100)
Otu2101	0	0	0	1	0	0	0	0	0	0	0	0	0	0	Acidobacteria(100)	Acidobacteria_Gp3(100)	Acidobacteria_Gp3_order_incetae_sedis(100)	Acidobacteria_Gp3_family_incetae_sedis(100)	Bryobacter(100)
Otu2102	0	0	0	1	0	0	0	0	0	0	0	0	0	0	unclassified(100)	unclassified(100)	unclassified(100)	unclassified(100)	unclassified(100)
Otu2103	0	0	0	1	0	0	0	0	0	0	0	0	0	0	unclassified(100)	unclassified(100)	unclassified(100)	unclassified(100)	unclassified(100)
Otu2104	0	0	0	1	0	0	0	0	0	0	0	0	0	0	unclassified(100)	unclassified(100)	unclassified(100)	unclassified(100)	unclassified(100)
Otu2105	0	0	0	1	0	0	0	0	0	0	0	0	0	0	unclassified(100)	unclassified(100)	unclassified(100)	unclassified(100)	unclassified(100)
Otu2106	0	0	0	0	0	0	0	0	0	0	1	0	0	0	unclassified(100)	unclassified(100)	unclassified(100)	unclassified(100)	unclassified(100)
Otu2107	0	0	0	1	0	0	0	0	0	0	0	0	0	0	Proteobacteria(100)	Alphaproteobacteria(100)	Sphingomonadales(100)	unclassified(100)	unclassified(100)
Otu2108	0	0	0	1	0	0	0	0	0	0	0	0	0	0	Actinobacteria(100)	Actinobacteria(100)	Solirubrobacterales(100)	unclassified(100)	unclassified(100)
Otu2109	0	0	0	1	0	0	0	0	0	0	0	0	0	0	Actinobacteria(100)	Actinobacteria(100)	unclassified(100)	unclassified(100)	unclassified(100)
Otu2110	0	0	0	1	0	0	0	0	0	0	0	0	0	0	unclassified(100)	unclassified(100)	unclassified(100)	unclassified(100)	unclassified(100)
Otu2111	0	0	0	1	0	0	0	0	0	0	0	0	0	0	unclassified(100)	unclassified(100)	unclassified(100)	unclassified(100)	unclassified(100)
Otu2113	0	0	0	0	0	0	0	0	0	0	0	0	1	0	Proteobacteria(100)	Betaproteobacteria(100)	Nitrosomonadales(100)	Nitrosomonadaceae(100)	Nitrosospira(100)
Otu2114	0	0	0	0	0	0	1	0	0	0	0	0	0	0	unclassified(100)	unclassified(100)	unclassified(100)	unclassified(100)	unclassified(100)
Otu2115	0	0	0	0	0	0	0	0	0	0	0	0	1	0	Firmicutes(100)	Bacilli(100)	Bacillales(100)	unclassified(100)	unclassified(100)
Otu2116	0	0	0	0	0	1	0	0	0	0	0	0	0	0	unclassified(100)	unclassified(100)	unclassified(100)	unclassified(100)	unclassified(100)
Otu2117	0	0	0	1	0	0	0	0	0	0	0	0	0	0	unclassified(100)	unclassified(100)	unclassified(100)	unclassified(100)	unclassified(100)
Otu2118	0	0	0	0	0	1	0	0	0	0	0	0	0	0	Proteobacteria(100)	unclassified(100)	unclassified(100)	unclassified(100)	unclassified(100)
Otu2119	0	0	0	1	0	0	0	0	0	0	0	0	0	0	Firmicutes(100)	Bacilli(100)	Bacillales(100)	Bacillaceae_2(100)	unclassified(100)
Otu2120	0	0	0	0	0	1	0	0	0	0	0	0	0	0	Proteobacteria(100)	Deltaproteobacteria(100)	Syntrophobacterales(100)	Syntrophobacteraceae(100)	unclassified(100)
Otu2121	0	0	0	0	0	1	0	0	0	0	0	0	0	0	Proteobacteria(100)	unclassified(100)	unclassified(100)	unclassified(100)	unclassified(100)
Otu2122	0	0	0	1	0	0	0	0	0	0	0	0	0	0	Proteobacteria(100)	Alphaproteobacteria(100)	Rhizobiales(100)	unclassified(100)	unclassified(100)
Otu2123	0	0	0	1	0	0	0	0	0	0	0	0	0	0	Proteobacteria(100)	Alphaproteobacteria(100)	Sphingomonadales(100)	Sphingomonadaceae(100)	Sphingomonas(100)
Otu2125	0	0	0	1	0	0	0	0	0	0	0	0	0	0	unclassified(100)	unclassified(100)	unclassified(100)	unclassified(100)	unclassified(100)
Otu2126	0	0	1	0	0	0	0	0	0	0	0	0	0	0	unclassified(100)	unclassified(100)	unclassified(100)	unclassified(100)	unclassified(100)
Otu2127	0	0	0	0	0	0	0	0	0	0	0	0	1	0	Bacteroidetes(100)	Sphingobacteria(100)	Sphingobacteriales(100)	Chitinophagaceae(100)	Niastella(100)
Otu2128	0	0	0	1	0	0	0	0	0	0	0	0	0	0	Proteobacteria(100)	Alphaproteobacteria(100)	Rhodospirillales(100)	unclassified(100)	unclassified(100)
Otu2129	0	0	0	0	0	0	0	0	0	0	0	0	1	0	Proteobacteria(100)	Alphaproteobacteria(100)	Rhizobiales(100)	unclassified(100)	unclassified(100)
Otu2130	0	0	0	0	0	0	0	0	0	0	1	0	0	0	unclassified(100)	unclassified(100)	unclassified(100)	unclassified(100)	unclassified(100)
Otu2131	0	0	0	1	0	0	0	0	0	0	0	0	0	0	unclassified(100)	unclassified(100)	unclassified(100)	unclassified(100)	unclassified(100)
Otu2133	0	0	0	1	0	0	0	0	0	0	0	0	0	0	Proteobacteria(100)	Alphaproteobacteria(100)	Caulobacterales(100)	Caulobacteraceae(100)	unclassified(100)
Otu2134	0	0	0	1	0	0	0	0	0	0	0	0	0	0	unclassified(100)	unclassified(100)	unclassified(100)	unclassified(100)	unclassified(100)
Otu2135	0	0	1	0	0	0	0	0	0	0	0	0	0	0	unclassified(100)	unclassified(100)	unclassified(100)	unclassified(100)	unclassified(100)
Otu2136	0	0	0	0	0	0	0	0	0	0	0	0	1	0	Proteobacteria(100)	Alphaproteobacteria(100)	Sphingomonadales(100)	Sphingomonadaceae(100)	Sphingomonas(100)
Otu2137	0	0	1	0	0	0	0	0	0	0	0	0	0	0	unclassified(100)	unclassified(100)	unclassified(100)	unclassified(100)	unclassified(100)
Otu2138	0	0	1	0	0	0	0	0	0	0	0	0	0	0	Proteobacteria(100)	Betaproteobacteria(100)	Burkholderiales(100)	unclassified(100)	unclassified(100)
Otu2139	0	0	1	0	0	0	0	0	0	0	0	0	0	0	Proteobacteria(100)	Alphaproteobacteria(100)	Rhodobacterales(100)	Rhodobacteraceae(100)	Amaricoccus(100)
Otu2140	0	0	1	0	0	0	0	0	0	0	0	0	0	0	Actinobacteria(100)	Actinobacteria(100)	Actinomycetales(100)	unclassified(100)	unclassified(100)
Otu2142	0	0	1	0	0	0	0	0	0	0	0	0	0	0	Actinobacteria(100)	Actinobacteria(100)	Actinomycetales(100)	unclassified(100)	unclassified(100)
Otu2143	0	0	0	0	0	0	1	0	0	0	0	0	0	0	Proteobacteria(100)	Betaproteobacteria(100)	Burkholderiales(100)	unclassified(100)	unclassified(100)
Otu2144	0	0	0	0	0	0	1	0	0	0	0	0	0	0	Proteobacteria(100)	unclassified(100)	unclassified(100)	unclassified(100)	unclassified(100)
Otu2145	0	0	1	0	0	0	0	0	0	0	0	0	0	0	unclassified(100)	unclassified(100)	unclassified(100)	unclassified(100)	unclassified(100)
Otu2146	0	0	0	0	0	0	0	0	0	0	0	0	1	0	Bacteroidetes(100)	Sphingobacteria(100)	Sphingobacteriales(100)	unclassified(100)	unclassified(100)
Otu2147	0	0	0	0	0	0	0	0	0	0	0	0	1	0	Proteobacteria(100)	unclassified(100)	unclassified(100)	unclassified(100)	unclassified(100)
Otu2148	0	0	0	0	0	0	1	0	0	0	0	0	0	0	Proteobacteria(100)	Betaproteobacteria(100)	Burkholderiales(100)	Oxalobacteraceae(100)	unclassified(100)
Otu2149	0	0	1	0	0	0	0	0	0	0	0	0	0	0	Proteobacteria(100)	unclassified(100)	unclassified(100)	unclassified(100)	unclassified(100)
Otu2150	0	0	0	0	0	0	1	0	0	0	0	0	0	0	Proteobacteria(100)	Alphaproteobacteria(100)	Sphingomonadales(100)	Erythrobacteraceae(100)	unclassified(100)
Otu2151	0	0	1	0	0	0	0	0	0	0	0	0	0	0	Proteobacteria(100)	Betaproteobacteria(100)	Rhodocyclales(100)	Rhodocyclaceae(100)	unclassified(100)
Otu2152	0	0	0	0	0	0	1	0	0	0	0	0	0	0	Proteobacteria(100)	Alphaproteobacteria(100)	Rhodospirillales(100)	Acetobacteraceae(100)	unclassified(100)
Otu2153	0	0	1	0	0	0	0	0	0	0	0	0	0	0	unclassified(100)	unclassified(100)	unclassified(100)	unclassified(100)	unclassified(100)
Otu2154	0	0	1	0	0	0	0	0	0	0	0	0	0	0	unclassified(100)	unclassified(100)	unclassified(100)	unclassified(100)	unclassified(100)
Otu2155	0	0	1	0	0	0	0	0	0	0	0	0	0	0	unclassified(100)	unclassified(100)	unclassified(100)	unclassified(100)	unclassified(100)
Otu2156	0	0	0	0	0	0	0	0	0	0	0	0	1	0	unclassified(100)	unclassified(100)	unclassified(100)	unclassified(100)	unclassified(100)
Otu2157	0	0	1	0	0	0	0	0	0	0	0	0	0	0	Proteobacteria(100)	Betaproteobacteria(100)	unclassified(100)	unclassified(100)	unclassified(100)
Otu2158	0	0	1	0	0	0	0	0	0	0	0	0	0	0	Proteobacteria(100)	unclassified(100)	unclassified(100)	unclassified(100)	unclassified(100)
Otu2159	0	0	1	0	0	0	0	0	0	0	0	0	0	0	unclassified(100)	unclassified(100)	unclassified(100)	unclassified(100)	unclassified(100)
Otu2160	0	0	1	0	0	0	0	0	0	0	0	0	0	0	unclassified(100)	unclassified(100)	unclassified(100)	unclassified(100)	unclassified(100)
Otu2161	0	0	1	0	0	0	0	0	0	0	0	0	0	0	Proteobacteria(100)	Alphaproteobacteria(100)	Rhodospirillales(100)	Acetobacteraceae(100)	unclassified(100)
Otu2162	0	0	1	0	0	0	0	0	0	0	0	0	0	0	unclassified(100)	unclassified(100)	unclassified(100)	unclassified(100)	unclassified(100)
Otu2163	0	0	1	0	0	0	0	0	0	0	0	0	0	0	Proteobacteria(100)	unclassified(100)	unclassified(100)	unclassified(100)	unclassified(100)
Otu2165	0	0	1	0	0	0	0	0	0	0	0	0	0	0	Actinobacteria(100)	Actinobacteria(100)	Solirubrobacterales(100)	unclassified(100)	unclassified(100)
Otu2166	0	0	1	0	0	0	0	0	0	0	0	0	0	0	unclassified(100)	unclassified(100)	unclassified(100)	unclassified(100)	unclassified(100)
Otu2167	0	0	1	0	0	0	0	0	0	0	0	0	0	0	unclassified(100)	unclassified(100)	unclassified(100)	unclassified(100)	unclassified(100)
Otu2168	0	0	1	0	0	0	0	0	0	0	0	0	0	0	Proteobacteria(100)	Alphaproteobacteria(100)	Rhizobiales(100)	unclassified(100)	unclassified(100)
Otu2170	0	0	0	0	0	0	1	0	0	0	0	0	0	0	Proteobacteria(100)	Betaproteobacteria(100)	Burkholderiales(100)	unclassified(100)	unclassified(100)
Otu2171	0	0	1	0	0	0	0	0	0	0	0	0	0	0	Actinobacteria(100)	Actinobacteria(100)	Actinomycetales(100)	unclassified(100)	unclassified(100)
Otu2173	0	0	0	1	0	0	0	0	0	0	0	0	0	0	unclassified(100)	unclassified(100)	unclassified(100)	unclassified(100)	unclassified(100)
Otu2174	0	0	0	1	0	0	0	0	0	0	0	0	0	0	Proteobacteria(100)	Gammaproteobacteria(100)	unclassified(100)	unclassified(100)	unclassified(100)
Otu2175	0	0	0	0	0	0	0	0	0	0	1	0	0	0	Proteobacteria(100)	Betaproteobacteria(100)	Burkholderiales(100)	Comamonadaceae(100)	unclassified(100)
Otu2177	0	0	0	0	0	1	0	0	0	0	0	0	0	0	Proteobacteria(100)	Alphaproteobacteria(100)	Sphingomonadales(100)	unclassified(100)	unclassified(100)
Otu2178	0	0	0	0	0	1	0	0	0	0	0	0	0	0	unclassified(100)	unclassified(100)	unclassified(100)	unclassified(100)	unclassified(100)
Otu2179	0	0	0	0	0	0	0	0	0	0	1	0	0	0	Proteobacteria(100)	unclassified(100)	unclassified(100)	unclassified(100)	unclassified(100)
Otu2181	0	0	0	0	0	1	0	0	0	0	0	0	0	0	Proteobacteria(100)	Gammaproteobacteria(100)	unclassified(100)	unclassified(100)	unclassified(100)
Otu2182	0	0	0	0	0	1	0	0	0	0	0	0	0	0	Verrucomicrobia(100)	Subdivision3(100)	Subdivision3_order_incertae_sedis(100)	Subdivision3_family_incertae_sedis(100)	3_genus_incertae_sedis(100)
Otu2183	0	0	0	1	0	0	0	0	0	0	0	0	0	0	unclassified(100)	unclassified(100)	unclassified(100)	unclassified(100)	unclassified(100)
Otu2184	0	0	0	0	0	1	0	0	0	0	0	0	0	0	Proteobacteria(100)	Betaproteobacteria(100)	Burkholderiales(100)	unclassified(100)	unclassified(100)
Otu2185	0	0	0	0	0	0	0	0	0	0	1	0	0	0	Proteobacteria(100)	Alphaproteobacteria(100)	Rhizobiales(100)	unclassified(100)	unclassified(100)
Otu2186	0	0	0	0	0	0	0	0	0	0	1	0	0	0	unclassified(100)	unclassified(100)	unclassified(100)	unclassified(100)	unclassified(100)
Otu2187	0	0	0	0	0	0	0	0	0	0	1	0	0	0	Proteobacteria(100)	unclassified(100)	unclassified(100)	unclassified(100)	unclassified(100)
Otu2188	0	0	0	0	0	0	0	0	0	0	1	0	0	0	Proteobacteria(100)	Betaproteobacteria(100)	Burkholderiales(100)	unclassified(100)	unclassified(100)
Otu2189	0	0	0	0	0	1	0	0	0	0	0	0	0	0	Proteobacteria(100)	Betaproteobacteria(100)	unclassified(100)	unclassified(100)	unclassified(100)
Otu2190	0	0	0	1	0	0	0	0	0	0	0	0	0	0	Actinobacteria(100)	Actinobacteria(100)	Actinomycetales(100)	unclassified(100)	unclassified(100)
Otu2191	0	0	0	1	0	0	0	0	0	0	0	0	0	0	unclassified(100)	unclassified(100)	unclassified(100)	unclassified(100)	unclassified(100)
Otu2192	0	0	0	1	0	0	0	0	0	0	0	0	0	0	unclassified(100)	unclassified(100)	unclassified(100)	unclassified(100)	unclassified(100)
Otu2193	0	0	0	0	0	1	0	0	0	0	0	0	0	0	Acidobacteria(100)	Acidobacteria_Gp1(100)	Acidobacteria_Gp1_order_incertae_sedis(100)	Acidobacteria_Gp1_family_incertae_sedis(100)	Gp1(100)
Otu2194	0	0	0	1	0	0	0	0	0	0	0	0	0	0	unclassified(100)	unclassified(100)	unclassified(100)	unclassified(100)	unclassified(100)
Otu2195	0	0	0	0	0	1	0	0	0	0	0	0	0	0	Proteobacteria(100)	Alphaproteobacteria(100)	unclassified(100)	unclassified(100)	unclassified(100)
Otu2197	0	0	0	1	0	0	0	0	0	0	0	0	0	0	Bacteroidetes(100)	Sphingobacteria(100)	Sphingobacteriales(100)	Chitinophagaceae(100)	unclassified(100)
Otu2198	0	0	0	0	0	0	0	0	0	0	0	0	1	0	Proteobacteria(100)	Alphaproteobacteria(100)	Sphingomonadales(100)	Sphingomonadaceae(100)	unclassified(100)
Otu2199	0	0	0	0	0	0	0	0	0	0	1	0	0	0	Proteobacteria(100)	Betaproteobacteria(100)	unclassified(100)	unclassified(100)	unclassified(100)
Otu2200	0	0	0	0	0	0	0	0	0	0	0	0	1	0	unclassified(100)	unclassified(100)	unclassified(100)	unclassified(100)	unclassified(100)
Otu2201	0	0	0	0	0	1	0	0	0	0	0	0	0	0	Proteobacteria(100)	Alphaproteobacteria(100)	Sphingomonadales(100)	unclassified(100)	unclassified(100)
Otu2204	0	0	0	1	0	0	0	0	0	0	0	0	0	0	Deinococcus-Thermus(100)	Deinococci(100)	Deinococcales(100)	Deinococcaceae(100)	Deinococcus(100)
Otu2205	0	0	0	1	0	0	0	0	0	0	0	0	0	0	unclassified(100)	unclassified(100)	unclassified(100)	unclassified(100)	unclassified(100)
Otu2206	0	0	0	0	0	0	0	0	0	0	1	0	0	0	unclassified(100)	unclassified(100)	unclassified(100)	unclassified(100)	unclassified(100)
Otu2207	0	0	0	1	0	0	0	0	0	0	0	0	0	0	unclassified(100)	unclassified(100)	unclassified(100)	unclassified(100)	unclassified(100)
Otu2208	0	0	0	1	0	0	0	0	0	0	0	0	0	0	Proteobacteria(100)	Betaproteobacteria(100)	unclassified(100)	unclassified(100)	unclassified(100)
Otu2209	0	0	0	0	0	1	0	0	0	0	0	0	0	0	Proteobacteria(100)	Gammaproteobacteria(100)	Xanthomonadales(100)	Xanthomonadaceae(100)	unclassified(100)
Otu2210	0	0	0	0	0	0	0	0	0	0	0	0	1	0	Proteobacteria(100)	Betaproteobacteria(100)	Burkholderiales(100)	Oxalobacteraceae(100)	Telluria(100)
Otu2211	0	0	0	0	0	1	0	0	0	0	0	0	0	0	Proteobacteria(100)	Betaproteobacteria(100)	Burkholderiales(100)	Oxalobacteraceae(100)	unclassified(100)
Otu2212	0	0	0	1	0	0	0	0	0	0	0	0	0	0	Firmicutes(100)	Clostridia(100)	Clostridiales(100)	Clostridiaceae_1(100)	unclassified(100)
Otu2213	0	0	0	1	0	0	0	0	0	0	0	0	0	0	Proteobacteria(100)	Alphaproteobacteria(100)	Rhodospirillales(100)	Acetobacteraceae(100)	unclassified(100)
Otu2214	0	0	0	0	0	0	0	0	0	0	0	0	1	0	Proteobacteria(100)	Betaproteobacteria(100)	Burkholderiales(100)	Burkholderiales_incertae_sedis(100)	unclassified(100)
Otu2216	0	0	0	1	0	0	0	0	0	0	0	0	0	0	Proteobacteria(100)	Alphaproteobacteria(100)	Rhodospirillales(100)	Rhodospirillaceae(100)	unclassified(100)
Otu2217	0	0	0	1	0	0	0	0	0	0	0	0	0	0	unclassified(100)	unclassified(100)	unclassified(100)	unclassified(100)	unclassified(100)
Otu2218	0	0	0	0	0	0	0	0	0	0	1	0	0	0	Proteobacteria(100)	unclassified(100)	unclassified(100)	unclassified(100)	unclassified(100)
Otu2219	0	0	0	1	0	0	0	0	0	0	0	0	0	0	Proteobacteria(100)	Alphaproteobacteria(100)	Rhizobiales(100)	unclassified(100)	unclassified(100)
Otu2220	0	0	0	0	0	1	0	0	0	0	0	0	0	0	Proteobacteria(100)	Betaproteobacteria(100)	unclassified(100)	unclassified(100)	unclassified(100)
Otu2221	0	0	0	0	0	1	0	0	0	0	0	0	0	0	unclassified(100)	unclassified(100)	unclassified(100)	unclassified(100)	unclassified(100)
Otu2222	0	0	0	1	0	0	0	0	0	0	0	0	0	0	unclassified(100)	unclassified(100)	unclassified(100)	unclassified(100)	unclassified(100)
Otu2223	0	0	0	1	0	0	0	0	0	0	0	0	0	0	Proteobacteria(100)	Alphaproteobacteria(100)	unclassified(100)	unclassified(100)	unclassified(100)
Otu2224	0	0	0	0	0	1	0	0	0	0	0	0	0	0	Bacteroidetes(100)	unclassified(100)	unclassified(100)	unclassified(100)	unclassified(100)
Otu2226	0	0	0	0	0	1	0	0	0	0	0	0	0	0	Proteobacteria(100)	unclassified(100)	unclassified(100)	unclassified(100)	unclassified(100)
Otu2227	0	0	0	0	0	1	0	0	0	0	0	0	0	0	Acidobacteria(100)	Acidobacteria_Gp1(100)	Acidobacteria_Gp1_order_incertae_sedis(100)	Acidobacteria_Gp1_family_incertae_sedis(100)	Gp1(100)
Otu2228	0	0	0	1	0	0	0	0	0	0	0	0	0	0	Proteobacteria(100)	Betaproteobacteria(100)	unclassified(100)	unclassified(100)	unclassified(100)
Otu2229	0	0	0	1	0	0	0	0	0	0	0	0	0	0	unclassified(100)	unclassified(100)	unclassified(100)	unclassified(100)	unclassified(100)
Otu2230	0	0	0	1	0	0	0	0	0	0	0	0	0	0	Proteobacteria(100)	Alphaproteobacteria(100)	unclassified(100)	unclassified(100)	unclassified(100)
Otu2231	0	0	0	1	0	0	0	0	0	0	0	0	0	0	unclassified(100)	unclassified(100)	unclassified(100)	unclassified(100)	unclassified(100)
Otu2232	0	0	0	0	0	0	0	0	0	0	0	0	1	0	Proteobacteria(100)	Deltaproteobacteria(100)	unclassified(100)	unclassified(100)	unclassified(100)
Otu2234	0	0	0	0	0	0	0	0	0	0	1	0	0	0	Proteobacteria(100)	Betaproteobacteria(100)	unclassified(100)	unclassified(100)	unclassified(100)
Otu2235	0	0	0	1	0	0	0	0	0	0	0	0	0	0	unclassified(100)	unclassified(100)	unclassified(100)	unclassified(100)	unclassified(100)
Otu2236	0	0	0	1	0	0	0	0	0	0	0	0	0	0	Proteobacteria(100)	Betaproteobacteria(100)	unclassified(100)	unclassified(100)	unclassified(100)
Otu2237	0	0	0	0	0	0	0	0	0	0	1	0	0	0	Proteobacteria(100)	Betaproteobacteria(100)	Burkholderiales(100)	Oxalobacteraceae(100)	unclassified(100)
Otu2238	0	0	0	0	0	1	0	0	0	0	0	0	0	0	unclassified(100)	unclassified(100)	unclassified(100)	unclassified(100)	unclassified(100)
Otu2239	0	0	0	0	0	0	0	0	0	0	1	0	0	0	Proteobacteria(100)	Betaproteobacteria(100)	Burkholderiales(100)	unclassified(100)	unclassified(100)
Otu2240	0	0	0	0	0	0	0	0	0	0	0	0	1	0	Proteobacteria(100)	Alphaproteobacteria(100)	Rhizobiales(100)	Bradyrhizobiaceae(100)	Bosea(100)
Otu2241	0	0	0	1	0	0	0	0	0	0	0	0	0	0	Proteobacteria(100)	Alphaproteobacteria(100)	unclassified(100)	unclassified(100)	unclassified(100)
Otu2242	0	0	0	1	0	0	0	0	0	0	0	0	0	0	unclassified(100)	unclassified(100)	unclassified(100)	unclassified(100)	unclassified(100)
Otu2243	0	0	0	0	0	1	0	0	0	0	0	0	0	0	unclassified(100)	unclassified(100)	unclassified(100)	unclassified(100)	unclassified(100)
Otu2245	0	0	0	1	0	0	0	0	0	0	0	0	0	0	Proteobacteria(100)	Alphaproteobacteria(100)	Rhizobiales(100)	unclassified(100)	unclassified(100)
Otu2246	0	0	0	0	0	1	0	0	0	0	0	0	0	0	Proteobacteria(100)	unclassified(100)	unclassified(100)	unclassified(100)	unclassified(100)
Otu2247	0	0	0	0	0	1	0	0	0	0	0	0	0	0	unclassified(100)	unclassified(100)	unclassified(100)	unclassified(100)	unclassified(100)
Otu2248	0	0	0	0	0	1	0	0	0	0	0	0	0	0	Proteobacteria(100)	unclassified(100)	unclassified(100)	unclassified(100)	unclassified(100)
Otu2249	0	0	0	0	0	0	0	0	0	0	0	0	1	0	Proteobacteria(100)	Alphaproteobacteria(100)	Sphingomonadales(100)	Sphingomonadaceae(100)	Sphingomonas(100)
Otu2251	0	0	1	0	0	0	0	0	0	0	0	0	0	0	unclassified(100)	unclassified(100)	unclassified(100)	unclassified(100)	unclassified(100)
Otu2252	0	0	0	0	0	0	1	0	0	0	0	0	0	0	unclassified(100)	unclassified(100)	unclassified(100)	unclassified(100)	unclassified(100)
Otu2253	0	0	1	0	0	0	0	0	0	0	0	0	0	0	Proteobacteria(100)	Alphaproteobacteria(100)	Rhizobiales(100)	unclassified(100)	unclassified(100)
Otu2254	0	0	0	0	0	0	1	0	0	0	0	0	0	0	unclassified(100)	unclassified(100)	unclassified(100)	unclassified(100)	unclassified(100)
Otu2255	0	0	1	0	0	0	0	0	0	0	0	0	0	0	unclassified(100)	unclassified(100)	unclassified(100)	unclassified(100)	unclassified(100)
Otu2256	0	0	1	0	0	0	0	0	0	0	0	0	0	0	unclassified(100)	unclassified(100)	unclassified(100)	unclassified(100)	unclassified(100)
Otu2257	0	0	1	0	0	0	0	0	0	0	0	0	0	0	unclassified(100)	unclassified(100)	unclassified(100)	unclassified(100)	unclassified(100)
Otu2258	0	0	1	0	0	0	0	0	0	0	0	0	0	0	Proteobacteria(100)	unclassified(100)	unclassified(100)	unclassified(100)	unclassified(100)
Otu2259	0	0	1	0	0	0	0	0	0	0	0	0	0	0	unclassified(100)	unclassified(100)	unclassified(100)	unclassified(100)	unclassified(100)
Otu2260	0	0	0	0	0	0	1	0	0	0	0	0	0	0	Proteobacteria(100)	Alphaproteobacteria(100)	unclassified(100)	unclassified(100)	unclassified(100)
Otu2261	0	0	1	0	0	0	0	0	0	0	0	0	0	0	Proteobacteria(100)	Alphaproteobacteria(100)	unclassified(100)	unclassified(100)	unclassified(100)
Otu2262	0	0	1	0	0	0	0	0	0	0	0	0	0	0	Proteobacteria(100)	Betaproteobacteria(100)	unclassified(100)	unclassified(100)	unclassified(100)
Otu2264	0	0	0	0	0	0	1	0	0	0	0	0	0	0	Proteobacteria(100)	Alphaproteobacteria(100)	Rhodospirillales(100)	Rhodospirillaceae(100)	Skermanella(100)
Otu2266	0	0	0	0	0	0	1	0	0	0	0	0	0	0	Gemmatimonadetes(100)	Gemmatimonadetes(100)	Gemmatimonadales(100)	Gemmatimonadaceae(100)	Gemmatimonas(100)
Otu2267	0	0	1	0	0	0	0	0	0	0	0	0	0	0	Proteobacteria(100)	Alphaproteobacteria(100)	Caulobacterales(100)	Caulobacteraceae(100)	unclassified(100)
Otu2268	0	0	1	0	0	0	0	0	0	0	0	0	0	0	Acidobacteria(100)	Acidobacteria_Gp3(100)	unclassified(100)	unclassified(100)	unclassified(100)
Otu2269	0	0	1	0	0	0	0	0	0	0	0	0	0	0	Proteobacteria(100)	Alphaproteobacteria(100)	unclassified(100)	unclassified(100)	unclassified(100)
Otu2270	0	0	1	0	0	0	0	0	0	0	0	0	0	0	unclassified(100)	unclassified(100)	unclassified(100)	unclassified(100)	unclassified(100)
Otu2271	0	0	1	0	0	0	0	0	0	0	0	0	0	0	unclassified(100)	unclassified(100)	unclassified(100)	unclassified(100)	unclassified(100)
Otu2272	0	0	0	0	0	0	1	0	0	0	0	0	0	0	unclassified(100)	unclassified(100)	unclassified(100)	unclassified(100)	unclassified(100)
Otu2273	0	0	1	0	0	0	0	0	0	0	0	0	0	0	unclassified(100)	unclassified(100)	unclassified(100)	unclassified(100)	unclassified(100)
Otu2274	0	0	1	0	0	0	0	0	0	0	0	0	0	0	Actinobacteria(100)	Actinobacteria(100)	Actinomycetales(100)	unclassified(100)	unclassified(100)
Otu2277	0	0	1	0	0	0	0	0	0	0	0	0	0	0	Proteobacteria(100)	Alphaproteobacteria(100)	Sphingomonadales(100)	Erythrobacteraceae(100)	Croceicoccus(100)
Otu2279	0	0	0	0	0	0	1	0	0	0	0	0	0	0	Bacteroidetes(100)	Sphingobacteria(100)	Sphingobacteriales(100)	Chitinophagaceae(100)	unclassified(100)
Otu2280	0	0	0	0	0	0	1	0	0	0	0	0	0	0	Proteobacteria(100)	Betaproteobacteria(100)	Burkholderiales(100)	Oxalobacteraceae(100)	Oxalicibacterium(100)
Otu2284	0	0	0	0	0	0	1	0	0	0	0	0	0	0	Proteobacteria(100)	Alphaproteobacteria(100)	Rhizobiales(100)	Hyphomicrobiaceae(100)	Devosia(100)
Otu2285	0	0	0	0	0	0	1	0	0	0	0	0	0	0	Proteobacteria(100)	Alphaproteobacteria(100)	unclassified(100)	unclassified(100)	unclassified(100)
Otu2287	0	0	0	0	0	0	1	0	0	0	0	0	0	0	Bacteroidetes(100)	Bacteroidetes_incertae_sedis_class_incertae_sedis(100)	Bacteroidetes_incertae_sedis_order_incertae_sedis(100)	Bacteroidetes_incertae_sedis_family_incertae_sedis(100)	Ohtaekwangia(100)
Otu2288	0	0	0	0	0	0	1	0	0	0	0	0	0	0	unclassified(100)	unclassified(100)	unclassified(100)	unclassified(100)	unclassified(100)
Otu2290	0	0	0	0	0	0	1	0	0	0	0	0	0	0	Proteobacteria(100)	Gammaproteobacteria(100)	Legionellales(100)	Coxiellaceae(100)	Aquicella(100)
Otu2291	0	0	0	0	0	0	1	0	0	0	0	0	0	0	Proteobacteria(100)	Alphaproteobacteria(100)	unclassified(100)	unclassified(100)	unclassified(100)
Otu2293	0	0	1	0	0	0	0	0	0	0	0	0	0	0	unclassified(100)	unclassified(100)	unclassified(100)	unclassified(100)	unclassified(100)
Otu2294	0	0	1	0	0	0	0	0	0	0	0	0	0	0	unclassified(100)	unclassified(100)	unclassified(100)	unclassified(100)	unclassified(100)
Otu2295	0	0	1	0	0	0	0	0	0	0	0	0	0	0	unclassified(100)	unclassified(100)	unclassified(100)	unclassified(100)	unclassified(100)
Otu2296	0	0	1	0	0	0	0	0	0	0	0	0	0	0	unclassified(100)	unclassified(100)	unclassified(100)	unclassified(100)	unclassified(100)
Otu2297	0	0	0	0	0	0	1	0	0	0	0	0	0	0	Proteobacteria(100)	Betaproteobacteria(100)	Burkholderiales(100)	Oxalobacteraceae(100)	unclassified(100)
Otu2298	0	0	1	0	0	0	0	0	0	0	0	0	0	0	Proteobacteria(100)	unclassified(100)	unclassified(100)	unclassified(100)	unclassified(100)
Otu2299	0	0	1	0	0	0	0	0	0	0	0	0	0	0	unclassified(100)	unclassified(100)	unclassified(100)	unclassified(100)	unclassified(100)
Otu2300	0	0	1	0	0	0	0	0	0	0	0	0	0	0	unclassified(100)	unclassified(100)	unclassified(100)	unclassified(100)	unclassified(100)
Otu2301	0	0	1	0	0	0	0	0	0	0	0	0	0	0	unclassified(100)	unclassified(100)	unclassified(100)	unclassified(100)	unclassified(100)
Otu2302	0	0	0	0	0	0	1	0	0	0	0	0	0	0	unclassified(100)	unclassified(100)	unclassified(100)	unclassified(100)	unclassified(100)
Otu2303	0	0	0	0	0	0	1	0	0	0	0	0	0	0	Proteobacteria(100)	Alphaproteobacteria(100)	Sphingomonadales(100)	Sphingomonadaceae(100)	unclassified(100)
Otu2304	0	0	1	0	0	0	0	0	0	0	0	0	0	0	unclassified(100)	unclassified(100)	unclassified(100)	unclassified(100)	unclassified(100)
Otu2305	0	0	1	0	0	0	0	0	0	0	0	0	0	0	Proteobacteria(100)	Alphaproteobacteria(100)	unclassified(100)	unclassified(100)	unclassified(100)
Otu2307	0	0	1	0	0	0	0	0	0	0	0	0	0	0	unclassified(100)	unclassified(100)	unclassified(100)	unclassified(100)	unclassified(100)
Otu2308	0	0	1	0	0	0	0	0	0	0	0	0	0	0	Firmicutes(100)	Bacilli(100)	Bacillales(100)	Alicyclobacillaceae(100)	unclassified(100)
Otu2309	0	0	1	0	0	0	0	0	0	0	0	0	0	0	Firmicutes(100)	Bacilli(100)	Bacillales(100)	Paenibacillaceae_1(100)	unclassified(100)
Otu2310	0	0	1	0	0	0	0	0	0	0	0	0	0	0	unclassified(100)	unclassified(100)	unclassified(100)	unclassified(100)	unclassified(100)
Otu2311	0	0	0	0	0	0	1	0	0	0	0	0	0	0	unclassified(100)	unclassified(100)	unclassified(100)	unclassified(100)	unclassified(100)
Otu2313	0	0	1	0	0	0	0	0	0	0	0	0	0	0	unclassified(100)	unclassified(100)	unclassified(100)	unclassified(100)	unclassified(100)
Otu2314	0	0	1	0	0	0	0	0	0	0	0	0	0	0	Firmicutes(100)	Bacilli(100)	Bacillales(100)	unclassified(100)	unclassified(100)
Otu2315	0	0	1	0	0	0	0	0	0	0	0	0	0	0	unclassified(100)	unclassified(100)	unclassified(100)	unclassified(100)	unclassified(100)
Otu2316	0	0	1	0	0	0	0	0	0	0	0	0	0	0	Proteobacteria(100)	Alphaproteobacteria(100)	Alphaproteobacteria_order_incertae_sedis(100)	Alphaproteobacteria_family_incertae_sedis(100)	Geminicoccus(100)
Otu2317	0	0	1	0	0	0	0	0	0	0	0	0	0	0	unclassified(100)	unclassified(100)	unclassified(100)	unclassified(100)	unclassified(100)
Otu2318	0	0	1	0	0	0	0	0	0	0	0	0	0	0	unclassified(100)	unclassified(100)	unclassified(100)	unclassified(100)	unclassified(100)
Otu2320	0	0	1	0	0	0	0	0	0	0	0	0	0	0	unclassified(100)	unclassified(100)	unclassified(100)	unclassified(100)	unclassified(100)
Otu2321	0	0	0	0	0	0	1	0	0	0	0	0	0	0	Firmicutes(100)	Bacilli(100)	Bacillales(100)	unclassified(100)	unclassified(100)
Otu2322	0	0	1	0	0	0	0	0	0	0	0	0	0	0	unclassified(100)	unclassified(100)	unclassified(100)	unclassified(100)	unclassified(100)
Otu2323	0	0	0	0	0	0	1	0	0	0	0	0	0	0	Proteobacteria(100)	Betaproteobacteria(100)	Burkholderiales(100)	unclassified(100)	unclassified(100)
Otu2324	0	0	0	0	0	0	0	0	0	0	0	0	1	0	unclassified(100)	unclassified(100)	unclassified(100)	unclassified(100)	unclassified(100)
Otu2325	0	0	1	0	0	0	0	0	0	0	0	0	0	0	unclassified(100)	unclassified(100)	unclassified(100)	unclassified(100)	unclassified(100)
